# Supplementary material for: BCl3‐Induced Annulative Oxo‐ and Thioboration for the Formation of C3‐Borylated Benzofurans and Benzothiophenes
Source: PubMed Central journal article supplement (PMC5396270; doi:10.1002/anie.201610014), 2016-11-29
Supplement: ANIE-56-354-s001.pdf [file ANIE-56-354-s001.pdf]

Supporting Information

**BCl<sub>3</sub>-Induced Annulative Oxo- and Thioboration for the Formation of C3-Borylated Benzofurans and Benzothiophenes**

*Andrew J. Warner, Anna Churn, John S. McGough, and Michael J. Ingleson\**

anie\_201610014\_sm\_miscellaneous\_information.pdf

## **Supporting Information**

- 1. General Considerations***
- 2. N-Directed Trans-haloboration***
- 3. Synthesis of Alkynes***
- 4. Cyclisation of 2-alkynylanisoles***
- 5. O-Directed Trans-haloboration***
- 6. External Additive Screening***
- 7. Double Borylative Cyclisation***
- 8. In-situ Cross-coupling***
- 9. Cyclisation of 2-alkynylthioanisoles***
- 10. In-situ NMR spectra***
- 11. Spectral Data on isolated compounds***
- 12. Crystal Data***
- 13. References***

## **1. General Considerations**

All manipulations of air and moisture sensitive species were performed under an atmosphere of argon or nitrogen using standard Schlenk and glovebox techniques unless otherwise stated. Glassware was dried in a hot oven overnight and heated under vacuum before use. Triethylamine was dried over calcium hydride and distilled under vacuum. Pentane and dichloromethane were dried by passing through an alumina drying column incorporated into an MBraun SPS800 solvent purification system. Tetrahydrofuran was dried by refluxing over potassium metal. All solvents were degassed and stored over molecular sieves (3Å) under inert atmosphere. All other materials were purchased from commercial vendors and used as received. NMR spectra were recorded with a Bruker AV-400 spectrometer (400 MHz  $^1\text{H}$ ; 100 MHz  $^{13}\text{C}$ ; 128 MHz  $^{11}\text{B}$ ; 376.50 MHz  $^{19}\text{F}$ ; 104 MHz  $^{27}\text{Al}$ ).  $^1\text{H}$  NMR chemical shifts are reported in ppm relative to protio impurities in the deuterated solvents and  $^{13}\text{C}$  NMR using the solvent resonances unless otherwise stated.  $^{11}\text{B}$  NMR spectra were referenced to external  $\text{BF}_3\cdot\text{Et}_2\text{O}$ ,  $^{27}\text{Al}$  to  $\text{Al}(\text{NO}_3)_3$  in  $\text{D}_2\text{O}$  ( $\text{Al}(\text{D}_2\text{O})_6^{3+}$ ) and  $^{19}\text{F}$  to external  $\text{C}_6\text{F}_6$ . *Resonances for the carbon directly bonded to boron are not observed in the  $^{13}\text{C}\{^1\text{H}\}$  NMR spectra due to quadrupolar relaxation effects. Some carbon signals in compounds **4a**, **4b**, **4h** and **8** are not observed due to coincident peaks.* The ionisation mode used in GC-MS was electron ionisation. All small scale cyclization reactions were carried out in J. Young NMR tubes to facilitate in-situ reaction monitoring. A number of samples are analysed in-situ in protio solvent with a capillary insert containing wet deuterated  $\text{d}_6$ -DMSO, this leads to a residual  $\text{H}_2\text{O}$  resonance being observed at 3.95 ppm in the  $^1\text{H}$  NMR spectra.

## **2. N-Directed Transhaloboration**

## Nitrogen Directed (2)

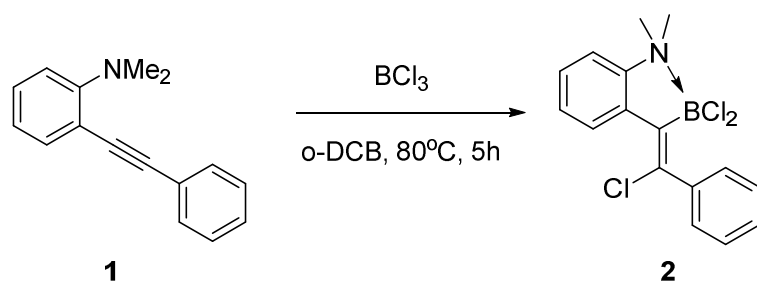

In a Schlenk fitted with J. Young's valve, alkyne **1** (50 mg, 0.226 mmol, 1 eq.) was dissolved in *o*-dichlorobenzene (2 mL) and  $\text{BCl}_3$  (1M in heptane) (0.29 mL, 0.290 mmol, 1.3 eq.) was added. The reaction was heated at  $80^\circ\text{C}$  for 5 hours then allowed to cool to  $20^\circ\text{C}$ . The solution was layered with hexane and stored in the freezer for a week. A colourless crystalline solid deposited on the walls of the ampoule and was collected. Upon analysis, the solid was found to be the desired *trans*-haloboration product **2** (51 mg, 67%).  $^1\text{H}$  NMR (400 MHz,  $\text{CD}_2\text{Cl}_2$ ):  $\delta$  3.02 (6H, s,  $\text{NMe}_2$ ); 7.35-7.41 (4H, m, Ar-H); 7.44 (1H, t,  $J = 7.6$  Hz, Ar-H); 7.50 (1H, t,  $J = 7.6$  Hz, Ar-H); 7.63-7.70 (2H, m, Ar-H); 8.47 (1H, d,  $J = 7.8$  Hz, Ar-H);  $^{13}\text{C}\{^1\text{H}\}$  NMR (100.6 MHz,  $\text{CD}_2\text{Cl}_2$ ):  $\delta$  49.5, 117.0, 127.4, 128.1, 128.7, 128.9, 129.0, 129.5, 130.5, 136.0, 140.5, 149.1;  $^{11}\text{B}$  NMR (128.6 MHz,  $\text{CD}_2\text{Cl}_2$ ):  $\delta$  10.5 (s) [GC-MS]  $m/z$  calculated for  $\text{C}_{16}\text{H}_{15}\text{BCl}_3\text{N}$ , 337.0; found 337.0. GC-MS retention times of analytes: 14.30 minutes: N-directed *trans*-haloboration product; [Acc. Mass] Calculated  $[\text{M}]^+$  337.0363  $\text{g mol}^{-1}$ , Observed  $[\text{M}]^+$  337.0352  $\text{g mol}^{-1}$ ; [Elem. Analysis] Calc: C (56.78%); H (4.47%); N (4.14%); Found: C (56.79%); H (4.56%); N (4.11%)

## 3. Synthesis of Alkynes

### General Procedure A<sup>1</sup>

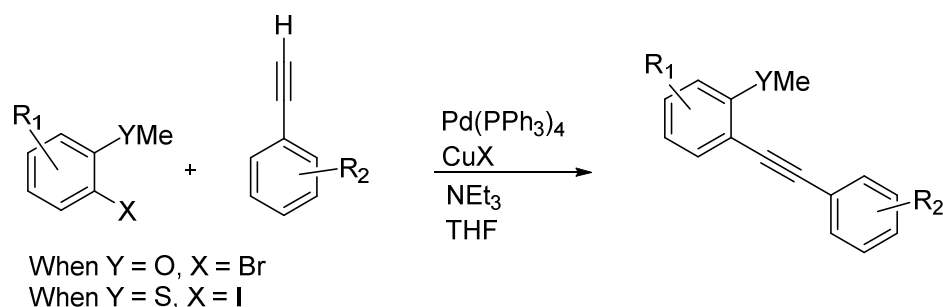

A Schlenk fitted with a J. Young's valve was charged with *tetrakis*-(triphenylphosphine)palladium(0) (0.02 eq.) and copper(I) halide (0.04 eq.). Tetrahydrofuran was added and the suspension was stirred for five minutes, followed by the addition of the aryl bromide (1 eq.) and triethylamine. After five minutes more stirring, the alkyne (1.1 eq.) was added and the solution was stirred and refluxed in the sealed vessel for 12 h. The solution was cooled to room temperature, filtered through a layer of celite on top of silica and eluted with diethyl ether (3 x 10 mL). The solvent was removed *in vacuo* and the crude material was purified via column chromatography to yield the corresponding alkyne.

### General Procedure B<sup>1</sup>

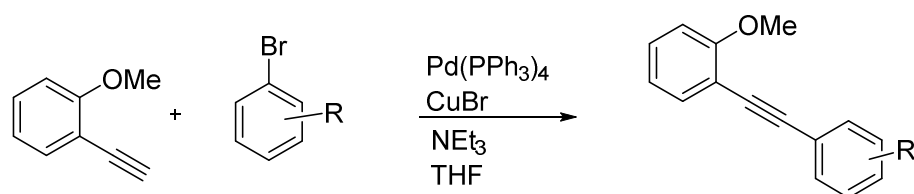

A Schlenk fitted with a J. Young's valve was charged with *tetrakis*-(triphenylphosphine)palladium(0) (0.02 eq.) and copper(I) bromide (0.04 eq.). Tetrahydrofuran was added and the suspension was stirred for five minutes, followed by the addition of the aryl bromide (1 eq.) and triethylamine. After five minutes more stirring, the alkyne (1.1 eq.) was added and the solution was stirred and refluxed in the sealed vessel for 12 h. The solution was cooled to room temperature, filtered through a layer of celite on top of silica and eluted with diethyl ether (3 x 10 mL). The solvent was removed *in vacuo* and the crude material was purified via column chromatography to yield the corresponding alkyne.

### N,N-dimethyl-2-(phenylethynyl)aniline (1)

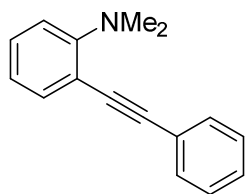

**Prepared according to general procedure A.** 2-bromo-N,N-dimethylaniline (0.8 g, 4.00mmol, 1 eq.), phenylacetylene (0.66 mL, 6.00 mmol, 1.5 eq), Pd(PPh<sub>3</sub>)<sub>4</sub> (139 mg, 0.120 mmol, 0.03 eq.), copper(I) bromide (34 mg, 0.240 mmol, 0.06 eq.), triethylamine (8 mL) and THF (10 mL). *Column chromatography eluent: 20% DCM in 40-60 petroleum ether.* **1** (0.42 g, 47%) obtained as an orange oil. Data is in accordance with the literature.<sup>2</sup>

### 1-methoxy-2-(phenylethynyl)benzene (3a)

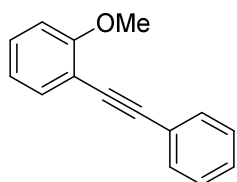

**Prepared according to general procedure A.** 2-bromoanisole (0.67 mL, 5.35 mmol, 1 eq.), phenylacetylene (0.70 mL, 6.42 mmol, 1.2 eq.), Pd(PPh<sub>3</sub>)<sub>4</sub> (124 mg, 0.107 mmol, 0.02 eq.), copper(I) bromide (31 mg, 0.214 mmol, 0.04 eq.), triethylamine (8 mL) and THF (10 mL). *Column chromatography eluent: 20% DCM in 40-60 petroleum ether.* **3a** (0.93 g, 84%) obtained as a dark orange oil. The data was in accordance with the literature<sup>3</sup>

### 1-methoxy-4-methyl-2-(phenylethynyl)benzene (3b)

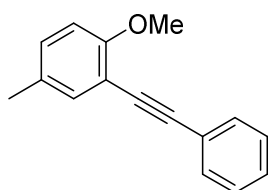

**Prepared according to general procedure A.** 2-bromo-1-methoxy-4-methylbenzene (1.08 mL, 7.46 mmol, 1 eq.), phenylacetylene (1.00 mL, 8.95 mmol, 1.2 eq.), Pd(PPh<sub>3</sub>)<sub>4</sub> (172 mg, 0.150 mmol, 0.02 eq.), copper(I) bromide (43 mg, 0.300 mmol, 0.04 eq.), triethylamine (8 mL) and THF (10 mL). *Column chromatography eluent: 20% DCM in 40-60 petroleum ether.* **3b** (1.28 g, 77%) obtained as an orange oil. The data was in accordance with the literature<sup>4</sup>

### 4-chloro-1-methoxy-2-(phenylethynyl)benzene (3c)

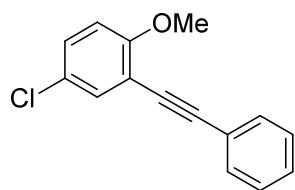

**Prepared according to general procedure A.** 2-bromo-1-methoxy-4-chlorobenzene (0.92 mL, 6.77 mmol, 1 eq.), phenylacetylene (0.90 mL, 8.13 mmol, 1.2 eq.), Pd(PPh<sub>3</sub>)<sub>4</sub> (156 mg, 0.135 mmol, 0.02 eq.), copper(I) bromide (39 mg, 0.271 mmol, 0.04 eq.), triethylamine (8 mL) and THF (10 mL). *Column chromatography eluent: 20% DCM in 40-60 petroleum ether.* **3c** (1.62 g, 98%) obtained as an orange oil. <sup>1</sup>H NMR (400 MHz, CDCl<sub>3</sub>): δ 3.91 (3H, s, OCH<sub>3</sub>); 6.83 (1H, d, J = 9.1 Hz, Ar-H); 7.26 (1H, dd, J = 8.8 Hz, 2.5 Hz, Ar-H); 7.33-7.39 (3H, m, Ar-H); 7.48 (1H, d, J = 2.5 Hz, Ar-H); 7.54-7.58 (2H, m, Ar-H); <sup>13</sup>C{<sup>1</sup>H} NMR (100.6 MHz, CDCl<sub>3</sub>): δ 56.2, 84.4, 94.5, 111.8, 114.1, 123.1, 125.2, 128.3, 128.5, 129.5, 131.7, 132.9, 158.6; [GC-MS] *m/z* calculated for C<sub>15</sub>H<sub>11</sub>ClO, 242.1; found 242.1. GC-MS retention times of analytes: 11.96 minutes: 4-chloro-1-methoxy-2-(phenylethynyl)benzene; [Acc. Mass] Calculated [M+H]<sup>+</sup>: 243.0571 gmol<sup>-1</sup>, Observed: [M+H]<sup>+</sup> 243.0571 gmol<sup>-1</sup>.

### 1-(phenylethynyl)-2-methoxy-3-fluorobenzene (3d)

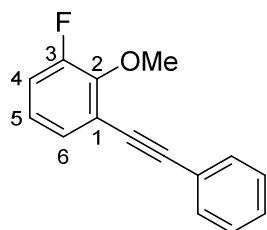

**Prepared according to general procedure A.** 1-bromo-2-methoxy-3-fluorobenzene (0.65 mL, 4.88 mmol, 1 eq.), phenylacetylene (0.54 mL, 4.88 mmol, 1.2 eq.), Pd(PPh<sub>3</sub>)<sub>4</sub> (113 mg, 0.098 mmol, 0.02 eq.), copper(I) bromide (28 mg, 0.196 mmol, 0.04 eq.), triethylamine (8 mL) and THF (10 mL). *Column chromatography eluent: 25% DCM in 40-60 petroleum ether.* **3d** (0.77 g, 71%) obtained as a brown solid. <sup>1</sup>H NMR (400 MHz, CDCl<sub>3</sub>): δ 4.09 (3H, s, OCH<sub>3</sub>); 6.96-7.03 (1H, m, Ar-H); 7.05-7.12 (1H, m, Ar-H); 7.28 (1H, dt, J = 7.8 Hz, 1.5 Hz, Ar-H); 7.34-7.41 (3H, m, Ar-H); 7.54-7.60 (2H, m, Ar-H); <sup>13</sup>C{<sup>1</sup>H} NMR (100.6 MHz, CDCl<sub>3</sub>): δ 61.6 (d, <sup>4</sup>J<sub>CF</sub> = 4.4 Hz, OMe); 84.6 (d, <sup>4</sup>J<sub>CF</sub> = 5.2 Hz, C<sub>1</sub>-C≡C); 94.3 (C<sub>1</sub>-C≡C); 117.2 (d, <sup>2</sup>J<sub>CF</sub> = 19.2 Hz, C<sub>4</sub>);

118.7 (d,  $^3J_{CF} = 3.7$  Hz,  $C_1$ ); 123.1, 123.4 (d,  $^2J_{CF} = 19.2$  Hz,  $C_4$ ); 128.4, 128.56, 128.62 (d,  $^4J_{CF} = 3.7$  Hz,  $C_6$ ); 131.7, 148.6 (d,  $^2J_{CF} = 11.8$  Hz,  $C_2$ ); 155.4 (d,  $^1J_{CF} = 247.0$  Hz,  $C_3$ );  $^{19}F$  NMR (376.50 MHz,  $CDCl_3$ ):  $\delta$  -130.79 (1F, Ar-F); [GC-MS]  $m/z$  calculated for  $C_{15}H_{11}FO$ , 226.1; found 226.1. GC-MS retention times of analytes: 10.92 minutes: 1-(phenylethynyl)-2-methoxy-3-fluorobenzene; [Acc. Mass] Calculated  $[M+H]^+$ : 227.0867  $g\text{mol}^{-1}$ , Observed:  $[M+H]^+$  227.0867  $g\text{mol}^{-1}$ .

### 1-methoxy-3-methyl-2-(phenylethynyl)benzene (3e)

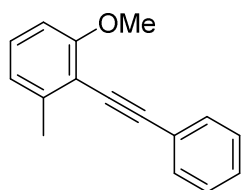

**Prepared according to general procedure A.** 2-bromo-1-methoxy-3-methylbenzene (1 g, 4.97 mmol, 1 eq.), phenylacetylene (0.55 mL, 4.97 mmol, 1 eq.),  $Pd(PPh_3)_4$  (115 mg, 0.099 mmol, 0.02 eq.), copper(I) bromide (28 mg, 0.198 mmol, 0.04 eq.), triethylamine (8 mL) and THF (10 mL). *Column chromatography eluent: 30% DCM in 40-60 petroleum ether.* **3e** (0.22 g, 19%) obtained as a brown oil. Data is in accordance with the literature.<sup>6</sup>

### 1-methoxy-2-(3-phenylprop-1-yn-1-yl)benzene (3f)

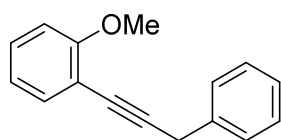

A Young's ampoule was charged with *tetrakis*-(triphenylphosphine)palladium(0) (247 mg, 0.214 mmol, 0.02 eq.) and copper(I) bromide (61 mg, 0.428 mmol, 0.04 eq.). Tetrahydrofuran (10 mL) was added and the suspension was stirred for five minutes, followed by the addition of 2-bromoanisole (1.33 mL, 10.69 mmol, 1 eq.) and triethylamine (7 mL). After five minutes more stirring, 3-phenylprop-1-yne (1.6 mL, 12.83 mmol, 1.2 eq.) was added and the solution was stirred and refluxed in the sealed vessel for 12 h. The solution was cooled to room temperature, filtered through a layer of celite on top of silica and eluted with diethyl ether (3 x 10 mL). The solvent was removed *in vacuo* and the crude material was purified via column chromatography (15% DCM in 40-60 petroleum ether) to yield **3f** (0.93 g, 39%) as a brown oil.  $^1H$  NMR (400 MHz,  $CDCl_3$ ):  $\delta$  3.91 (3H, s,  $OCH_3$ ); 3.93



(2H, s,  $CH_2Ph$ ); 6.88-6.94 (2H, m, Ar-H); 7.23-7.32 (2H, m, Ar-H); 7.36 (2H, t,  $J = 7.6$  Hz, Ar-H); 7.42-7.51 (3H, m, Ar-H);  $^{13}C\{^1H\}$  NMR (100.6 MHz,  $CDCl_3$ ):  $\delta$  26.1, 55.8, 78.9, 91.7, 110.5, 112.7, 120.4, 126.6, 128.0, 128.5, 129.3, 133.7, 136.9, 160.0; [GC-MS]  $m/z$  calculated for  $C_{15}H_{11}O$ , 207.1; found 207.1. GC-MS retention times of analytes: 10.81 minutes: 1-methoxy-2-(3-phenylprop-1-yn-1-yl)benzene; [Acc. Mass] Calculated  $[M]^+$ : 222.1045  $gmol^{-1}$ , Observed:  $[M]^+$  222.1045  $gmol^{-1}$ .

### 1-methoxy-2-(prop-1-yn-1-yl)benzene (3g)

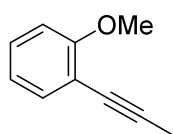

In a Young's ampoule, 2-ethynylanisole (0.98 mL, 7.57 mmol, 1 eq.) was dissolved in tetrahydrofuran and stirred at  $-78^\circ C$  over 20 minutes.  $^nBuLi$  (5.7 mL, 9.08 mmol, 1.2 eq.) was added dropwise and stirred at  $-78^\circ C$  for a further 20 minutes. After this time, iodomethane (0.94 mL, 15.133 mmol, 2 eq.) was added dropwise and the solution was warmed to  $20^\circ C$  and stirred for 5 hours before being quenched with  $NH_4Cl$  (100 mL). The desired compound was extracted into DCM (4 x 25 mL), dried over  $MgSO_4$  and the solvent was removed *in vacuo* to give **3g** (985 mg, 89%) as an orange oil, with no further purification necessary. Data is in accordance with the literature.<sup>5</sup>

### Ethyl 4-((2-methoxyphenyl)ethynyl)benzoate (3h)

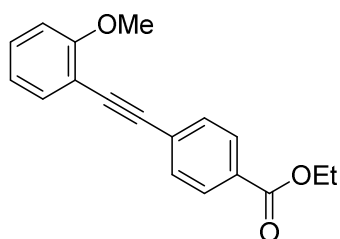

**Prepared according to general procedure B.** 2-ethynylanisole (0.98 mL, 7.57 mmol, 1.2 eq.), ethyl-4-bromobenzoate (1.03 mL, 6.31 mmol, 1 eq.),  $Pd(PPh_3)_4$  (146 mg, 0.126 mmol, 0.02 eq.), copper(I) bromide (36 mg, 0.252 mmol, 0.04 eq.), triethylamine (8 mL) and THF (10

mL). Column chromatography eluent: 30% DCM in 40-60 petroleum ether. **3h** (1.33 g, 75%) obtained as an orange oil. Data is in accordance with the literature.<sup>3</sup>

2-methoxy-4-nitro-1-(phenylethynyl)benzene (**3i**)

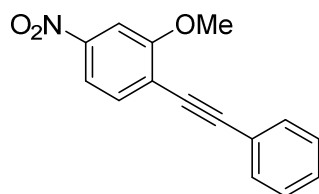

**Prepared according to general procedure A.** A Schlenk fitted with a J. Young's valve was charged with *tetrakis*-(triphenylphosphine)palladium(0) (122 mg, 0.106 mmol, 0.02 eq.) and copper(I) bromide (30 mg, 0.212 mmol, 0.04 eq.). Tetrahydrofuran (10 mL) was added and the suspension was stirred for five minutes, followed by the addition of 2-bromo-5-nitroanisole (1.23 g, 5.3 mmol, 1 eq.) and triethylamine (7 mL). After five minutes more stirring, phenylacetylene (0.7 mL, 6.36 mmol, 1.2 eq.) was added and the solution was stirred and refluxed in the sealed vessel for 12 h. The solution was cooled to room temperature, filtered through a layer of celite on top of silica and eluted with diethyl ether (3 x 10 mL). The solvent was removed *in vacuo* and the crude material was purified via column chromatography (50% DCM in 40-60 petroleum ether) to yield **3i** (0.91 g, 68%) as a yellow solid. Data is in accordance with the literature.<sup>7</sup>

1-((2-methoxyphenyl)ethynyl)naphthalene (3j)

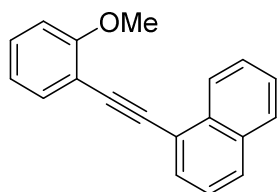

**Prepared according to general procedure A.** A Schlenk fitted with a J. Young's valve was charged with *tetrakis*-(triphenylphosphine)palladium(0) (124 mg, 0.107 mmol, 0.02 eq.) and copper(I) bromide (31 mg, 0.214 mmol, 0.04 eq.). Tetrahydrofuran (10 mL) was added and the suspension was stirred for five minutes, followed by the addition of 2-bromoanisole (0.67 mL, 5.35 mmol, 1 eq.) and triethylamine (7 mL). After five minutes more stirring, 1-ethynynaphthalene (0.91 mL, 6.42 mmol, 1.2 eq.) was added and the solution was stirred and refluxed in the sealed vessel for 12 h. The solution was cooled to room temperature, filtered through a layer of celite on top of silica and eluted with diethyl ether (3 x 10 mL). The solvent was removed *in vacuo* and the crude material was purified via column chromatography (50% DCM in 40-60 petroleum ether) to yield **3j** (0.88 g, 63%) as a brown oil. Data is in accordance with the literature.<sup>8</sup>

((2,5-dimethoxy-1,4-phenylene)bis(ethyne-2,1-diyl))dibenzene (6)

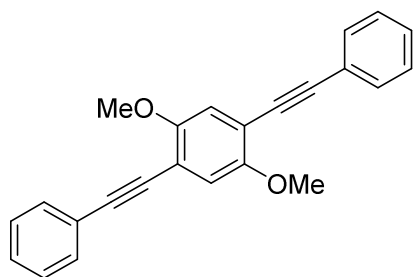

**Prepared according to general procedure A.** 1,4-dibromo-2,5-dimethoxybenzene (2 g, 6.76 mmol, 1 eq.), phenylacetylene (1.71 mL, 15.55 mmol, 2.3 eq), Pd(PPh<sub>3</sub>)<sub>4</sub> (312 mg, 0.270mmol, 0.04 eq.), copper(I) bromide (78 mg, 0.541 mmol, 0.08 eq.), triethylamine (10 mL) and THF (15 mL). *Column chromatography eluent: 50% DCM in 40-60 petroleum ether.* **1i** (1.196 g, 52%) obtained as an orange oil. Data is in accordance with the literature.<sup>9</sup>

### Methyl(2-(phenylethynyl)phenyl)sulfane (9a)

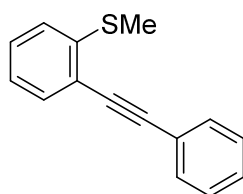

**Prepared according to general procedure B.** 2-iodothioanisole (1 g, 4.00mmol, 1 eq.), phenylacetylene (0.66 mL, 6.00 mmol, 1.5 eq.), Pd(PPh<sub>3</sub>)<sub>4</sub> (138 mg, 0.120 mmol, 0.03 eq.), copper(I) iodide (46 mg, 0.24 mmol, 0.06 eq.), triethylamine (8 mL) and THF (10 mL). *Column chromatography eluent: 10% DCM in 40-60 petroleum ether.* **9a** (0.24 g, 27%) obtained as a dark orange oil. Data is in accordance with the literature.<sup>10</sup>

### Methyl(2-(naphthalen-1-ylethynyl)phenyl)sulfane (9b)

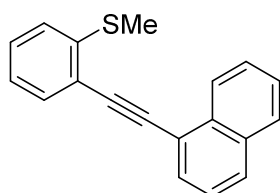

**Prepared according to general procedure B.** 2-iodothioanisole (1 g, 4.00mmol, 1 eq.), 1-ethynyl-naphthalene (0.85 mL, 6.00 mmol, 1.5 eq.), Pd(PPh<sub>3</sub>)<sub>4</sub> (138 mg, 0.120 mmol, 0.03 eq.), copper(I) iodide (46 mg, 0.24 mmol, 0.06 eq.), triethylamine (8 mL) and THF (10 mL). *Column chromatography eluent: DCM on base-treated silica (run through 5% NEt<sub>3</sub> in hexane before adding compound to column).* **9b** (543 mg, 50%) as a yellow oil. <sup>1</sup>H NMR (400 MHz, CDCl<sub>3</sub>): δ 2.58 (3H, s, SCH<sub>3</sub>); 7.18 (1H, td, *J* = 7.5 Hz, 1.1 Hz, Ar-*H*); 7.22-7.26 (1H, m, Ar-*H*); 7.33-7.39 (1H, m, Ar-*H*); 7.48 (1H, dd, *J* = 8.3 Hz, 7.3 Hz, Ar-*H*); 7.52 - 7.58 (1H, m, Ar-*H*); 7.60-7.67 (2H, m, Ar-*H*); 7.83 (1H, dd, *J* = 7.2 Hz, 1.1 Hz); 7.84 - 7.91 (2H, m, Ar-*H*); 8.63 (1H, d, *J* = 8.3 Hz, Ar-*H*); <sup>13</sup>C{<sup>1</sup>H} NMR (100.6 MHz, CDCl<sub>3</sub>): δ 15.3, 91.7, 94.1, 120.9, 121.6, 124.3, 124.4, 125.3, 126.5, 126.6, 126.9, 128.2, 128.87, 128.92, 130.6, 132.5, 133.2, 133.3, 141.7 [GC-MS] *m/z* calculated for C<sub>19</sub>H<sub>14</sub>S, 274.1; found 274.1. GC-MS retention times of analytes: 14.23 minutes: Methyl(2-(naphthalen-1-ylethynyl)phenyl)sulfane; [Acc. Mass] Calculated [M+H]<sup>+</sup>: 275.0889 gmol<sup>-1</sup>, Observed: [M+H]<sup>+</sup> 275.0892 gmol<sup>-1</sup>.

(2-(mesitylethynyl)phenyl)(methyl)sulfane (9c)

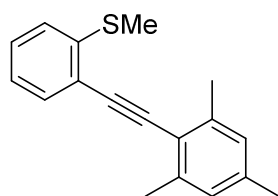

**Prepared according to general procedure A.** 2-iodothioanisole (1.6 g, 6.30 mmol, 1 eq.), 2-ethynylmesitylene (1 g, 6.93 mmol, 1.1 eq), Pd(PPh<sub>3</sub>)<sub>4</sub> (146 mg, 0.126 mmol, 0.02 eq.), copper(I) iodide (48 mg, 0.252 mmol, 0.04 eq.), triethylamine (8 mL) and THF (10 mL). *Column chromatography eluent: 15% DCM in 40-60 petroleum ether.* **9c** (1.59 g, 95%) obtained as an orange solid. <sup>1</sup>H NMR (400 MHz, CDCl<sub>3</sub>): δ 2.34 (3H, s, SCH<sub>3</sub>); 2.54 (3H, s, Mes(*p*-CH<sub>3</sub>)); 2.58 (6H, s, C≡C-Mes(*o*-CH<sub>3</sub>)<sub>2</sub>); 6.94 (2H, s, Mes-*H*); 7.15 (1H, t, J = 7.6 Hz, Ar-*H*); 7.21 (1H, d, J = 7.8 Hz, Ar-*H*); 7.30-7.40 (1H, m, Ar-*H*); 7.54(1H, d, J = 7.8 Hz, Ar-*H*); <sup>13</sup>C{<sup>1</sup>H} NMR (100.6 MHz, CDCl<sub>3</sub>): δ 15.1, 21.3, 21.5, 94.0, 94.4, 120.0, 121.9, 123.8, 124.2, 127.7, 128.5, 132.3, 138.0, 140.4, 141.1; [GC-MS] *m/z* calculated for C<sub>18</sub>H<sub>18</sub>S, 266.1; found 266.1. GC-MS retention times of analytes: 12.98 minutes: (2-(mesitylethynyl)phenyl)(methyl)sulfane; [Acc. Mass] Calculated [M+H]<sup>+</sup>: 267.1202 gmol<sup>-1</sup>, Observed [M+H]<sup>+</sup>: 267.1198 gmol<sup>-1</sup>.

### 3-((2-(methylthio)phenyl)ethynyl)thiophene (9d)

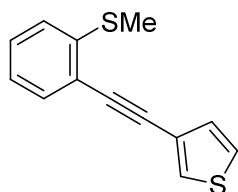

**Prepared according to general procedure A.** 2-iodothioanisole (1 g, 4.00mmol, 1 eq.), 3-ethynylthiophene (0.47 mL, 4.80 mmol, 1.2 eq), Pd(PPh<sub>3</sub>)<sub>4</sub> (139 mg, 0.120 mmol, 0.02 eq.), copper(I) iodide (46 mg, 0.240 mmol, 0.04 eq.), triethylamine (8 mL) and THF (10 mL). *Column chromatography eluent: 20% DCM in 40-60 petroleum ether.* **9d** (0.62 g, 68%) obtained as an orange oil. <sup>1</sup>H NMR (400 MHz, CDCl<sub>3</sub>): δ 2.52 (3H, s, SCH<sub>3</sub>); 7.12 (1H, td, J = 7.6 Hz, 1.3 Hz, Ar-H); 7.18 (1H, d, J = 8.1 Hz, Ar-H); 7.25 (1H, dd, J = 5.0 Hz, 1.3 Hz, Ar-H); 7.29-7.34 (2H, m, Ar-H); 7.48 (1H, dd, J = 7.6 Hz, 1.3 Hz, Ar-H); 7.58 (1H, dd, J = 3.0 Hz, 1.3 Hz, Ar-H); <sup>13</sup>C{<sup>1</sup>H} NMR (100.6 MHz, CDCl<sub>3</sub>): δ 15.1, 86.3, 91.0, 121.3, 122.2, 124.1, 124.3, 125.4, 128.7, 128.8, 129.9, 132.2, 141.6; [GC-MS] *m/z* calculated for C<sub>13</sub>H<sub>10</sub>S<sub>2</sub>, 230.0; found 230.0. GC-MS retention times of analytes: 12.08 minutes: 3-((2-(methylthio)phenyl)ethynyl)thiophene; [Acc. Mass] Calculated [M+H]<sup>+</sup>: 231.0296 gmol<sup>-1</sup>, Observed: [M+H]<sup>+</sup> 231.0306 gmol<sup>-1</sup>.

## 4. Cyclisation of 2-alkynylanisoles

### General Procedure

Due to the variable molarity of commercial  $\text{BCl}_3$  solutions an excess of  $\text{BCl}_3$  was formally used. All commercial  $\text{BCl}_3$  solutions from various vendors labelled as 1M in DCM were actually found to be lower than 1M by varying amounts (by NMR titration experiments with  $\text{PPh}_3$ ). Therefore between 1.1 – 1.4 equivalents of “1M”  $\text{BCl}_3$  are used, which really approximates to a 1:1 ratio between alkyne and  $\text{BCl}_3$ . To minimize the gradual decrease in molarity of  $\text{BCl}_3$  solutions over time due to the high volatility of  $\text{BCl}_3$  the  $\text{BCl}_3$  solutions are transferred to ampoules sealed with J. Youngs valves after first use. An excess of  $\text{BCl}_3$  can be used rather than determining the molarity of  $\text{BCl}_3$ , with removal of solvent *in vacuo* also removing any excess of  $\text{BCl}_3$ .

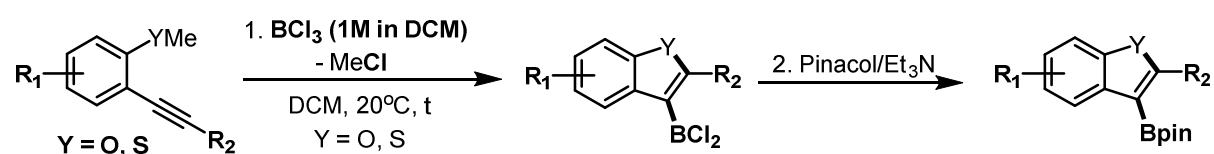

The alkyne (1 eq.) was dissolved in DCM and boron trichloride (“1M” in DCM, 1.1-1.4 eq) was added. The reaction was stirred (or rotated at 10 revolutions per minute if performed in a J. Youngs NMR tube) at room temperature for the specified time until reaction completion and the solvent was removed *in vacuo* (also removing any unreacted  $\text{BCl}_3$ ). The resulting oil was then re-dissolved in DCM, and transferred via cannula to a  $0-5^\circ\text{C}$  solution of pinacol (1.1 eq.) and  $\text{NEt}_3$  (approx. 15 eq.) in DCM (**Caution: the esterification is highly exothermic!**). All subsequent steps were performed under air with non-purified solvents. The solvent was removed *in vacuo* and the product was extracted into pentane and filtered. The filtrate was collected and the solvent removed *in vacuo*. If necessary the resulting material was purified further via column chromatography to yield the corresponding boronate ester. It should be noted the majority of boronate esters did not require column chromatography, with a simple filtration through a plug of silica sufficient to yield pure material.

4,4,5,5-tetramethyl-2-(2-phenylbenzofuran-3-yl)-1,3,2-dioxaborolane (**4a**)

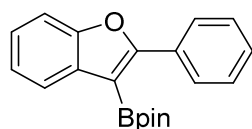

Prepared according to the general procedure. Alkyne **3a** (130 mg, 0.630 mmol, 1 eq.),  $\text{BCl}_3$  (0.75 mL, 0.750 mmol, 1.2 eq.), DCM (0.5 mL),  $\text{NEt}_3$  (1.5 mL) and pinacol (78 mg, 0.660 mmol, 1.05 eq.). Filtered through silica with pentane for purification. **4a** (112 mg, 56%) obtained as an orange film.  $^1\text{H}$  NMR (400 MHz,  $\text{CDCl}_3$ ):  $\delta$  1.40 (12H, s, *Bpin*); 7.21-7.33 (2H, m, *Ar-H*); 7.37-7.47 (3H, m, *Ar-H*); 7.49-7.53 (1H, m, *Ar-H*); 8.00-8.03 (1H, m, *Ar-H*); 8.13-8.19 (2H, m, *Ar-H*);  $^{13}\text{C}\{^1\text{H}\}$  NMR (100.6 MHz,  $\text{CDCl}_3$ ):  $\delta$  23.9, 82.6, 109.5, 121.9, 122.1, 123.2, 127.1, 128.1, 130.3, 132.3, 153.6, 161.9;  $^{11}\text{B}$  NMR (128.6MHz,  $\text{CDCl}_3$ );  $\delta$  30.6 (s); [GC-MS]  $m/z$  calculated for  $\text{C}_{20}\text{H}_{21}\text{BO}_3$ , 320.2; found 320.2. GC-MS retention times of analytes: 16.31 minutes: 4,4,5,5-tetramethyl-2-(2-phenylbenzofuran-3-yl)-1,3,2-dioxaborolane; [Acc. Mass] Calculated  $[\text{M}+\text{H}]^+$ :  $321.1657 \text{ gmol}^{-1}$ , Observed  $[\text{M}+\text{H}]^+$ :  $321.1655 \text{ gmol}^{-1}$ .

4,4,5,5-tetramethyl-2-(5-methyl-2-phenylbenzofuran-3-yl)-1,3,2-dioxaborolane (**4b**)

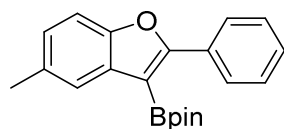

Prepared according to the general procedure. Alkyne **3b** (44 mg, 0.198 mmol, 1 eq.),  $\text{BCl}_3$  (0.24 mL, 0.240 mmol, 1.2 eq.), DCM (0.5 mL),  $\text{NEt}_3$  (0.5 mL) and pinacol (28 mg, 0.240 mmol, 1.2 eq.). Filtered through silica with pentane for purification. **4b** (59 mg, 89%) obtained as a colourless film.  $^1\text{H}$  NMR (400 MHz,  $\text{CDCl}_3$ ):  $\delta$  1.43 (12H, s, *Bpin*); 2.50 (3H, s, *Ar-CH}\_3*); 7.11 (1H, dd,  $J = 8.3 \text{ Hz}, 1.8 \text{ Hz}$ , *Ar-H*); 7.38-7.49 (4H, m, *Ar-H*); 7.76-7.79 (1H, m, *Ar-H*); 8.14-8.18 (2H, m, *Ar-H*);  $^{13}\text{C}\{^1\text{H}\}$  NMR (100.6 MHz,  $\text{CDCl}_3$ ):  $\delta$  21.6, 25.0, 83.6, 110.1, 122.8, 125.5, 128.1, 129.0, 131.4, 132.4, 133.3, 153.1, 163.1;  $^{11}\text{B}$  NMR (128.6MHz,  $\text{CDCl}_3$ );  $\delta$  30.5 (s); [GC-MS]  $m/z$  calculated for  $\text{C}_{21}\text{H}_{23}\text{BO}_3$ : 334.2; found 334.2. GC-MS retention times of analytes: 13.44 minutes: 4,4,5,5-tetramethyl-2-(5-methyl-2-phenylbenzofuran-3-yl)-1,3,2-dioxaborolane; [Acc. Mass] Calculated  $[\text{M}]^+$ :  $334.1740 \text{ gmol}^{-1}$ , Observed  $[\text{M}]^+$ :  $334.1733 \text{ gmol}^{-1}$ .



### 2-(5-chloro-2-phenylbenzofuran-3-yl)-4,4,5,5-tetramethyl-1,3,2-dioxaborolane (**4c**)

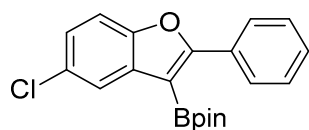

Prepared according to the general procedure. Alkyne **3c** (44 mg, 0.181 mmol, 1 eq.), BCl<sub>3</sub> (0.22 mL, 0.220 mmol, 1.2 eq.), DCM (0.5 mL), NEt<sub>3</sub> (0.5 mL) and pinacol (26 mg, 0.220 mmol, 1.2 eq.). Filtered through silica with pentane for purification. **4c** (46 mg, 72%) obtained as a colourless film. <sup>1</sup>H NMR (400 MHz, CDCl<sub>3</sub>): δ 1.42 (12H, s, Bpin); 7.25 (1H, dd, J = 8.6 Hz, 2.3 Hz, Ar-H); 7.40-7.49 (4H, m, Ar-H); 7.98 (1H, dd, J = 2.3 Hz, 0.5 Hz, Ar-H); 8.14-8.18 (2H, m, Ar-H); <sup>13</sup>C{<sup>1</sup>H} NMR (100.6 MHz, CDCl<sub>3</sub>): δ 24.9, 83.8, 111.5, 122.7, 124.4, 128.2, 128.3, 128.5, 129.5, 130.8, 134.8, 153.0, 164.4; <sup>11</sup>B NMR (128.6 MHz, CDCl<sub>3</sub>): δ 30.4 (s); [GC-MS] *m/z* calculated for C<sub>20</sub>H<sub>20</sub>BClO<sub>3</sub>: 354.2; found 354.2. GC-MS retention times of analytes: 13.80 minutes: 2-(5-chloro-2-phenylbenzofuran-3-yl)-4,4,5,5-tetramethyl-1,3,2-dioxaborolane; [Acc. Mass] [M]<sup>+</sup> 354.1189 gmol<sup>-1</sup> [Acc. Mass] Calculated [M]<sup>+</sup>: 354.1194 gmol<sup>-1</sup>, Observed [M]<sup>+</sup>: 354.1189 gmol<sup>-1</sup>.

### 2-(7-fluoro-2-phenylbenzofuran-3-yl)-4,4,5,5-tetramethyl-1,3,2-dioxaborolane (**4d**)

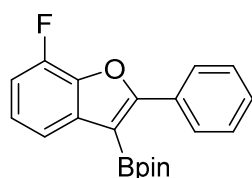

Prepared according to the general procedure. Alkyne **3d** (91 mg, 0.402 mmol, 1 eq.), BCl<sub>3</sub> (0.53 mL, 0.52 mmol, 1.3 eq.), DCM (0.5 mL), NEt<sub>3</sub> (1 mL) and pinacol (65 mg, 0.550 mmol, 1.4 eq.). Filtered through silica with pentane for purification. **4d** (107 mg, 79%) obtained as a colourless film. <sup>1</sup>H NMR (400 MHz, CDCl<sub>3</sub>): δ 1.45 (12H, s, Bpin); 7.06 (1H, ddd, J = 10.6 Hz, 8.1 Hz, 1.0 Hz, Ar-H); 7.21 (1H, td, J = 8.1 Hz, 4.5 Hz, Ar-H); 7.43-7.53 (3H, m, Ar-H); 7.82 (1H, dd, J = 7.8 Hz, 1.0 Hz, Ar-H); 8.21-8.25 (2H, m, Ar-H); <sup>13</sup>C{<sup>1</sup>H} NMR (100.6 MHz, CDCl<sub>3</sub>): δ 24.9 ((CH<sub>3</sub>CO)<sub>2</sub>B), 83.8 ((CH<sub>3</sub>CO)<sub>2</sub>B), 110.5 (d, J = 15.5 Hz); 118.7 (d, 3.7 Hz); 123.4 (d, J = 5.9 Hz); 128.3 (d, J = 8.9 Hz); 128.9 (d, J = 13.2 Hz); 129.5, 130.7, 136.9 (d, J = 3.0 Hz); 141.6 (d, J = 11.1 Hz); 142.6 (d, J = 248.4 Hz); 163.8; <sup>11</sup>B NMR (128.6 MHz, CDCl<sub>3</sub>): δ 30.5 (s); <sup>19</sup>F NMR (376.50 MHz, CDCl<sub>3</sub>): δ -137.66; [GC-MS] *m/z* calculated for C<sub>20</sub>H<sub>20</sub>BFO<sub>3</sub>: 338.2; found 338.2.

GC-MS retention times of analytes: 16.19 minutes: 2-(7-fluoro-2-phenylbenzofuran-3-yl)-4,4,5,5-tetramethyl-1,3,2-dioxaborolane; [Acc. Mass] Calculated  $[M]^+$ : 338.1490  $\text{g mol}^{-1}$ , Observed  $[M]^+$ : 338.1486  $\text{g mol}^{-1}$ .

4,4,5,5-tetramethyl-2-(4-methyl-2-phenylbenzofuran-3-yl)-1,3,2-dioxaborolane (**4e**)

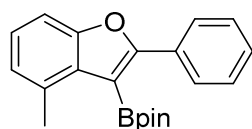

In a J. Young's NMR tube, Alkyne **3e** (32 mg, 0.144 mmol, 1 eq.) and 2,4,6-tri-*tert*-butylpyridine (TBP) (36 mg, 0.144 mmol, 1 eq.) were dissolved in DCM (0.5 mL).  $\text{BCl}_3$  (0.53 mL, 0.52 mmol, 1.3 eq.) was added and the mixture was left for 12 hours at 20°C. After this time, the mixture was layered with  $\text{NEt}_3$  (1 mL) and pinacol (18 mg, 0.152 mmol, 1.25 eq.) was added. The tube was inverted to mix, and the crude compound was immediately generated. This was purified via preparative TLC (Eluent: 15% DCM in 40-60 petroleum ether) to give **4e** (16 mg, 33%) as a white solid.  $^1\text{H}$  NMR (400 MHz,  $\text{CDCl}_3$ ):  $\delta$  1.41 (12H, s, Bpin); 2.66 (3H, m, Ar- $\text{CH}_3$ ); 7.02 (1H, dt,  $J = 7.3$  Hz, 0.7 Hz, Ar- $H$ ); 7.18 (1H, t,  $J = 7.8$  Hz, Ar- $H$ ); 7.34-7.47 (4H, m, Ar- $H$ ); 7.91-7.95 (2H, m, Ar- $H$ );  $^{13}\text{C}\{^1\text{H}\}$  NMR (100.6 MHz,  $\text{CDCl}_3$ ):  $\delta$  20.7, 25.1, 84.3, 108.4, 123.9, 124.2, 127.8, 128.2, 128.8, 131.4, 131.7, 132.4, 155.1;  $^{11}\text{B}$  NMR (128.6 MHz,  $\text{CDCl}_3$ ):  $\delta$  31.7 (s); [GC-MS]  $m/z$  calculated for  $\text{C}_{21}\text{H}_{23}\text{BO}_3$ : 334.2; found 334.2. GC-MS retention times of analytes: 13.49 minutes: 4,4,5,5-tetramethyl-2-(4-methyl-2-phenylbenzofuran-3-yl)-1,3,2-dioxaborolane; [Acc. Mass] Calculated  $[M+H]^+$ : 335.1813  $\text{g mol}^{-1}$ , Observed  $[M+H]^+$ : 335.1811  $\text{g mol}^{-1}$

TBP was added to this reaction mixture as trace hydrolysis of  $\text{BCl}_3$  generates HCl which can lead to alkyl migration as previously observed.<sup>11</sup> Indeed on addition of TBP a small quantity of protonated TBP was observed.

2-(2-benzylbenzofuran-3-yl)-4,4,5,5-tetramethyl-1,3,2-dioxaborolane (**4f**)

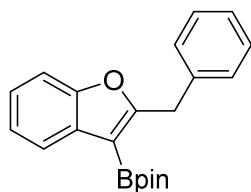

Prepared according to the general procedure. Alkyne **3f** (30 mg, 0.135 mmol, 1 eq.), BCl<sub>3</sub> (0.16 mL, 0.160 mmol, 1.2 eq.), DCM (0.5 mL), NEt<sub>3</sub> (0.5 mL) and pinacol (19 mg, 0.160 mmol, 1.2 eq.). Filtered through silica with pentane for purification. **4f** (26 mg, 57%) obtained as a colourless film. <sup>1</sup>H NMR (400 MHz, CDCl<sub>3</sub>): δ 1.42 (12H, s, Bpin); 4.40 (2H, s, PhCH<sub>2</sub>); 7.20-7.27 (3H, m, Ar-H); 7.32 (2H, t, J = 7.6 Hz); 7.38-7.43 (3H, m, Ar-H); 7.89-7.93 (1H, m, Ar-H); <sup>13</sup>C{<sup>1</sup>H} NMR (100.6 MHz, CDCl<sub>3</sub>): δ 25.0, 34.8, 83.3, 110.6, 122.5, 122.7, 123.5, 126.5, 128.5, 128.9, 131.8, 138.2, 155.1, 167.1; <sup>11</sup>B NMR (128.6MHz, CDCl<sub>3</sub>): δ 30.4 (s); [GC-MS] *m/z* calculated for C<sub>21</sub>H<sub>23</sub>BO<sub>3</sub>: 334.2; found 334.2. GC-MS retention times of analytes: 13.00 minutes: 2-(2-benzylbenzofuran-3-yl)-4,4,5,5-tetramethyl-1,3,2-dioxaborolane; [Acc. Mass] Calculated [M+H]<sup>+</sup>: 335.1813 gmol<sup>-1</sup>, Observed [M+H]<sup>+</sup>: 335.1824 gmol<sup>-1</sup>

4,4,5,5-tetramethyl-2-(2-methylbenzofuran-3-yl)-1,3,2-dioxaborolane (**4g**)

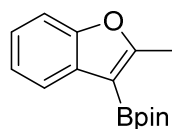

*Small scale:* Prepared according to the general procedure using a J. Young's NMR tube. Alkyne **3g** (31 mg, 0.212 mmol, 1 eq.), BCl<sub>3</sub> (0.23 mL, 0.230 mmol, 1.1 eq.), DCM (0.5 mL), NEt<sub>3</sub> (0.5 mL) and pinacol (27 mg, 0.230 mmol, 1.1 eq.). Filtered through silica with pentane for purification. **4g** (48 mg, 89%) obtained as a white solid.

*Larger scale:* Prepared according to the general procedure. Alkyne **3g** (867 mg, 5.931 mmol, 1 eq.), BCl<sub>3</sub> (7.7 mL, 7.71 mmol, 1.3 eq.), DCM (5 mL), NEt<sub>3</sub> (5 mL) and pinacol (940 mg, 7.95 mmol, 1.3 eq.). Filtered through silica with pentane for purification. **4g** (1.16 g, 76%) obtained as a white solid.

*Non-purified solvents under ambient conditions:* In a 100 mL round-bottomed flask open to the atmosphere, alkyne **3g** (51mg, 0.345mmol, 1 eq.), BCl<sub>3</sub> (0.41 mL, 0.410 mmol, 1.1 eq.), non-purified DCM (0.5 mL) were added. The mixture was stirred for five minutes before non-purified NEt<sub>3</sub> (1 mL) and pinacol (49 mg, 0.41 mmol, 1.1 eq.) were added. The crude mixture was extracted and filtered through silica using pentane to give **4g** (72 mg, 81%) as a white solid.

<sup>1</sup>H NMR (400 MHz, CDCl<sub>3</sub>): δ 1.38 (12H, s, Bpin); 2.65 (3H, s, Ar-CH<sub>3</sub>); 7.18-7.25 (2H, m, Ar-H); 7.38-7.44 (1H, m, Ar-H); 7.82-7.88 (1H, m, Ar-H); <sup>13</sup>C{<sup>1</sup>H} NMR (100.6 MHz, CDCl<sub>3</sub>): δ 14.5, 25.0, 83.1, 110.2, 122.1, 122.7, 123.2, 132.1, 154.8, 165.8; <sup>11</sup>B NMR (128.6MHz, CDCl<sub>3</sub>); δ 30.3 (s); [GC-MS] *m/z* calculated for C<sub>15</sub>H<sub>19</sub>BO<sub>3</sub>, 258.1; found 258.1. GC-MS retention times of analytes: 10.73 minutes: 2-(2,5-dimethylbenzofuran-3-yl)-4,4,5,5-tetramethyl-1,3,2-dioxaborolane; [Acc. Mass] Calculated [M+H]<sup>+</sup>: 259.1500 gmol<sup>-1</sup>, Observed [M+H]<sup>+</sup>: 259.1499 gmol<sup>-1</sup>

Ethyl 4-(3-(4,4,5,5-tetramethyl-1,3,2-dioxaborolan-2-yl)benzofuran-2-yl)benzoate (**4h**)

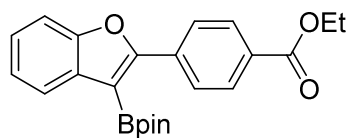

In a J. Young's NMR tube, alkyne **3h** (20 mg, 0.071 mmol, 1 eq.) and TBP (20 mg, 0.071 mmol, 1 eq.) were dissolved in DCM (0.5 mL).  $\text{BCl}_3$  (0.24 mL, 0.240 mmol, 3.3 eq.) was added and the mixture was left for 12 hours at 20°C. After this time, the mixture was layered with  $\text{NEt}_3$  (1 mL) and pinacol (29 mg, 0.245 mmol, 3.5 eq.) was added. The tube was inverted to mix, and the crude compound was immediately generated. This was purified via preparative TLC (Eluent: 20% DCM in 40-60 petroleum ether) to give **4h** (13 mg, 46%) as a white solid.  $^1\text{H}$  NMR (400 MHz,  $\text{CDCl}_3$ ):  $\delta$  1.43 (12H, s, Bpin); 1.44 (3H, t,  $J = 7.1$  Hz,  $\text{COOCH}_2\text{CH}_3$ ); 4.42 (2H, q,  $J = 7.1$  Hz,  $\text{COOCH}_2\text{CH}_3$ ); 7.25-7.36 (2H, m Ar-H); 7.52-7.55 (1H, m, Ar-H); 8.04 (1H, m, Ar-H); 8.12 (2H, dt,  $J = 8.4$  Hz, 1.7 Hz, Ar-H); 8.28 (2H, dt,  $J = 8.4$  Hz, 1.7 Hz, Ar-H);  $^{13}\text{C}\{^1\text{H}\}$  NMR (100.6 MHz,  $\text{CDCl}_3$ ):  $\delta$  14.4, 25.0, 61.1, 83.9, 110.7, 123.2, 123.4, 124.9, 127.8, 129.4, 130.4, 133.1, 135.4, 154.8, 161.4, 166.4;  $^{11}\text{B}$  NMR (128.6 MHz,  $\text{CDCl}_3$ ):  $\delta$  30.4 (s); [GC-MS]  $m/z$  calculated for  $\text{C}_{23}\text{H}_{25}\text{BO}_5$ : 392.2; found 392.2. GC-MS retention times of analytes: 15.33 minutes: Ethyl 4-(3-(4,4,5,5-tetramethyl-1,3,2-dioxaborolan-2-yl)benzofuran-2-yl)benzoate; [Acc. Mass] Calculated  $[\text{M}+\text{H}]^+$ : 393.1868  $\text{g mol}^{-1}$ , Observed  $[\text{M}+\text{H}]^+$ : 393.1868  $\text{g mol}^{-1}$

Excess  $\text{BCl}_3$  was utilised in this case as one equivalent of  $\text{BCl}_3$  coordinates to the ester moiety.

## 5. O-Directed Transhaloboration

### Oxygen Directed (5)

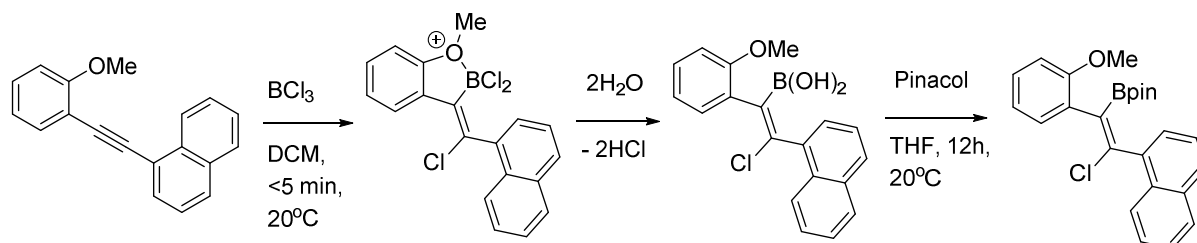

In a Young's NMR tube, alkyne **3j** (35 mg, 0.135 mmol, 1 eq.) was dissolved in DCM (0.4 mL).  $\text{BCl}_3$  (0.15 mL, 0.150 mmol, 1.1 eq.) was added. After five minutes, an excess of water was added and the tube was sonicated to assist with mixing. The resulting boronic acid was then stirred with pinacol (18 mg, 0.149 mmol, 1.1 eq.) in THF (5 mL) to generate the esterified product. This was purified via chromatography (20% DCM in 40-60 petroleum ether), however two very minor impurities, the starting alkyne and the borylated benzofuran (from the cyclisation pathway), were observed that could not be completely separated in our hands. Data reported for the major component, which corresponds to the haloboration product.

$^1\text{H}$  NMR (400 MHz,  $\text{CDCl}_3$ ):  $\delta$  1.39 (6H, s, *Bpin*); 1.41 (6H, s, *Bpin*); 3.74 (3H, s, *OMe*); 6.37 (1H, td,  $J = 7.6$  Hz, 1.0 Hz, *Ar-H*); 6.62 (1H, dd,  $J = 7.6$  Hz, 1.1 Hz, *Ar-H*); 6.67 (1H, d,  $J = 8.1$  Hz, *Ar-H*); 6.95 (1H, td,  $J = 8.3$  Hz, 1.7 Hz, *Ar-H*); 7.23-7.31 (2H, m, *Ar-H*); 7.42-7.51 (2H, m, *Ar-H*); 7.70 (1H, d,  $J = 7.6$  Hz, *Ar-H*); 7.78 (1H, d,  $J = 7.3$  Hz, *Ar-H*); 8.20 (1H, d,  $J = 8.3$  Hz, *Ar-H*);  $^{11}\text{B}$  NMR (128.6 MHz,  $\text{CDCl}_3$ ):  $\delta$  31.0 (s);  $^{13}\text{C}\{^1\text{H}\}$  NMR (100.6 MHz,  $\text{CDCl}_3$ ):  $\delta$  24.8, 24.9, 55.1, 84.0, 109.8, 120.3, 125.1, 125.8, 126.0, 126.2, 127.3, 128.1, 128.2, 128.3, 128.8, 130.0, 130.7, 133.4, 137.2, 138.3, 156.1 [APCI]  $m/z$  calculated for  $[\text{M}+\text{H}]^+$  421.2; found 421.1;  $[\text{M}-\text{Cl}]^+$  Calculated 385.2; found 385.2;  $[\text{M}+\text{NH}_4]^+$  Calculated 438.2; Found 438.2 [Acc. Mass]  $[\text{M}+\text{H}]^+$  Calculated 421.1736; Found 421.1743

## 6. External Screening

### General Procedure

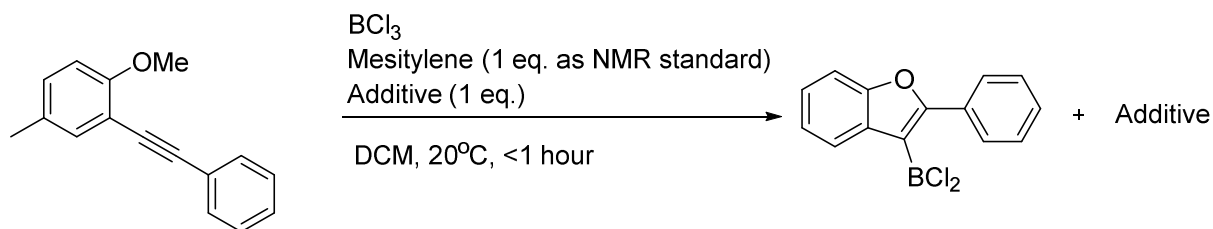

In a J. Young's NMR tube, alkyne **3b** (30mg) was dissolved in DCM (0.5 mL) with a known amount of mesitylene to act as an internal standard, and one equivalent of an additive. BCl<sub>3</sub> was added and the *in-situ* yields were determined within one hour using NMR spectroscopy to compare the quantities of desired product and additive against the mesitylene standard.

| Additive              | BCl <sub>3</sub><br>Equivalents | Substrate          |                                  | Timescale<br>(h) |                                           |
|-----------------------|---------------------------------|--------------------|----------------------------------|------------------|-------------------------------------------|
|                       |                                 | Consumption<br>(%) | NMR Conversion<br>To Product (%) |                  |                                           |
| No additive           | 1.2                             | 100                | 96                               | <0.5             |                                           |
| Nitromethane          | 1.2                             | 100                | 84                               | <0.5             |                                           |
| Acetone               | 2.2                             | 100                | 38                               | <0.5             |                                           |
| Trifluorotoluene      | 1.2                             | 100                | 90                               | <0.5             |                                           |
| N,N-Dimethylaniline   | 2.2                             | 100                | 74                               | <0.5             |                                           |
| Benzaldehyde          | 2.2                             | 100                | 17                               | <0.5             |                                           |
| Hex-1-ene             | 1.2                             | 100                | 91                               | <0.5             |                                           |
| N,N-Dimethylbenzamide | 2.2                             | 100                | 72                               | <0.5             |                                           |
| 2-bromopyridine       | 2.2                             | 100                | 86                               | <0.5             |                                           |
| 4-bromobenzonitrile   | 1.2                             | 51                 | 45                               | <0.5             |                                           |
|                       | 1.2                             | 100                | *72                              | 24               | Aryl BCl <sub>2</sub> with coordinated CN |
|                       | 2.2                             | 100                | 96                               | <0.5             |                                           |

Table 1. Additives used in the external functionality screening

## 7. Double Borylative Cyclisation

2,2'-(2,6-diphenylbenzo[1,2-b:4,5-b']difuran-3,7-diyl)bis(4,4,5,5-tetramethyl-1,3,2-dioxaborolane) (7)

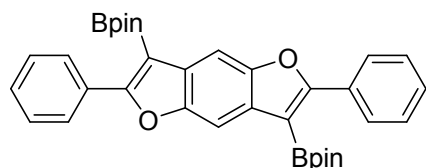

Prepared according to the general procedure. Alkyne **6** (118 mg, 0.358 mmol, 1 eq.),  $\text{BCl}_3$  (0.79 mL, 0.790 mmol, 2.2 eq.), DCM (4 mL),  $\text{NEt}_3$  (4 mL) and pinacol (91mg, 0.790 mmol, 2.2 eq.). Filtered through silica with pentane for purification. **7** (176 mg, 88%) obtained as a white solid.  $^1\text{H}$  NMR (400 MHz,  $\text{CDCl}_3$ ):  $\delta$  1.45 (24H, s, *Bpin*); 7.37-7.50 (6H, m, *Ar-H*); 8.10 (2H, s, 2(*C-H*) on central ring); 8.20-8.24 (4H, m, *Ar-H*);  $^{13}\text{C}\{^1\text{H}\}$  NMR (100.6 MHz,  $\text{CDCl}_3$ ):  $\delta$  25.0, 83.7, 103.3, 128.12, 128.16, 129.0, 131.4, 131.5, 152.1, 163.5;  $^{11}\text{B}$  NMR (128.6MHz,  $\text{CDCl}_3$ ):  $\delta$  31.0 (s); [APCI]  $m/z$  calculated for  $\text{C}_{34}\text{H}_{36}\text{B}_2\text{O}_6$ , 563.3; found 563.3; [Acc. Mass] Calculated  $[\text{M}+\text{H}]^+$ : 563.2771  $\text{g mol}^{-1}$ , Observed  $[\text{M}+\text{H}]^+$ : 563.2755  $\text{g mol}^{-1}$



## 8. In-situ Cross-coupling

### 5-methyl-2-phenyl-3-(p-tolyl)benzofuran (**8**)

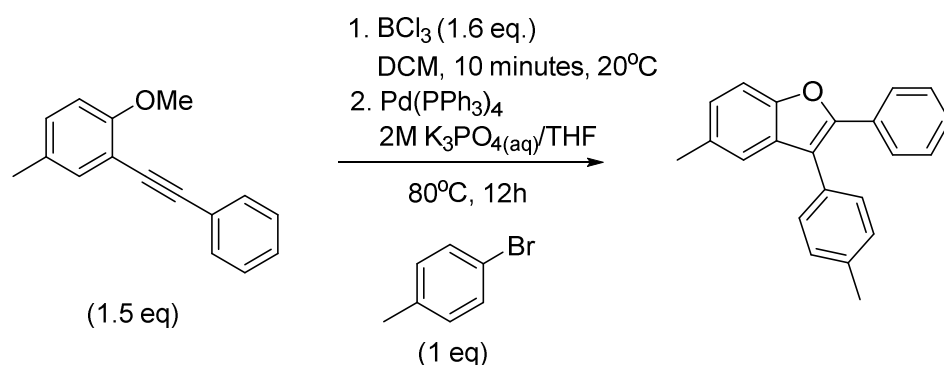

In a Schlenk fitted with a J. Young valve,  $\text{BCl}_3$  (0.54 mL, 0.540 mmol, 1.7 eq.) was added to a solution of alkyne **3b** (100 mg, 0.450 mmol, 1.5 eq.) in DCM (2 mL) and stirred for 10 minutes. After this time, the solvent and any remaining  $\text{BCl}_3$  were removed *in vacuo* and  $\text{Pd}(\text{PPh}_3)_4$  (21 mg, 0.018 mmol, 0.06 mmol) and 4-bromotoluene (51 mg, 0.298 mmol, 1 eq.) were added as solids. A solution of aqueous 2M  $\text{K}_3\text{PO}_4$  (1.1 mL, 2.250 mmol, 7.5 eq.) in THF (10 mL) was degassed for 30 minutes and added to the ampoule. The resulting solution was stirred and refluxed for 12 hours. After this time, the solution was allowed to cool to  $20^\circ\text{C}$  and  $\text{Et}_2\text{O}$  (15 mL) was added. The crude mixture was washed with distilled water (3 x 10 mL) and the organic layer was dried over  $\text{MgSO}_4$  and evaporated *in vacuo*. The resulting oil was purified via column chromatography (10% DCM / 90% 40-60 petroleum ether) to give benzofuran **8** (63 mg, 72% based on 4-bromo-toluene) as a colourless oil.  $^1\text{H}$  NMR (400 MHz,  $\text{CDCl}_3$ ):  $\delta$  2.44 (3H, s, Ar-Me); 2.47 (3H, s, Ar-Me); 7.15 (1H, d,  $J = 8.3$  Hz, Ar-H); 7.27-7.36 (6H, m, Ar-H); 7.38-7.47 (3H, m, Ar-H); 7.68 (2H, d,  $J = 7.3$  Hz, Ar-H);  $^{13}\text{C}\{^1\text{H}\}$  NMR (100.6 MHz,  $\text{CDCl}_3$ ):  $\delta$  21.4, 110.6, 117.3, 119.8, 125.9, 126.9, 128.2, 128.4, 129.65, 129.71, 130.0, 130.5, 131.0, 132.4, 137.3, 150.5, 152.4; [GC-MS]  $m/z$  calculated for  $\text{C}_{22}\text{H}_{18}\text{O}$ , 298.1; found 298.1. GC-MS retention times of analytes: 17.46 minutes: 5-methyl-2-phenyl-3-(p-tolyl)benzofuran; [Acc. Mass] Calculated  $[\text{M}+\text{H}]^+$  299.1431  $\text{g mol}^{-1}$ , Observed  $[\text{M}+\text{H}]^+$  299.1430  $\text{g mol}^{-1}$

### Isolated cross coupling of 4g with 4-bromo-toluene

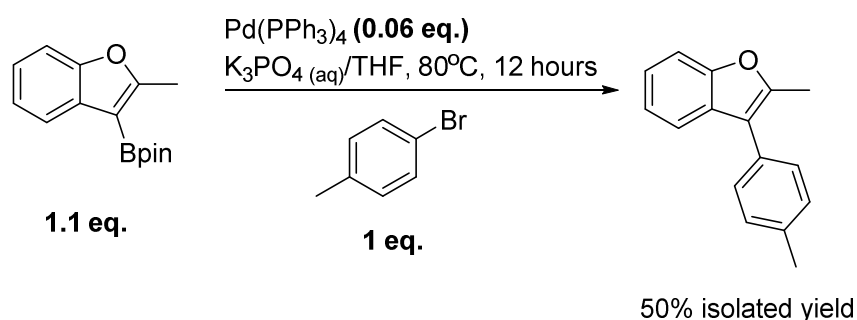

In a Schlenk fitted with a J. Young's valve 4,4,5,5-tetramethyl-2-(2-methylbenzofuran-3-yl)-1,3,2-dioxaborolane **4g** (100 mg, 0.387 mmol, 1.1 eq.), 4-bromotoluene (60 mg, 0.352 mmol, 1 eq.) and  $\text{Pd}(\text{PPh}_3)_4$  (25 mg, 0.021 mmol, 0.06 eq) were added to a degassed solution of 1:1 THF/2M  $\text{K}_3\text{PO}_4$ (aq) (10 mL) which was sealed and stirred at  $80^\circ\text{C}$  for 12 hours. The mixture was then cooled to  $20^\circ\text{C}$ , washed with water (3 x 10 mL) and extracted into ether (3 x 10 mL). The solvent was removed *in vacuo* and the compound was purified via column chromatography (10% DCM in 40-60 petroleum ether) to give the cross coupled product (43 mg, 50%) as a white solid. The data was in accordance with the literature.<sup>12</sup>

In this case, the moderate yield was attributed to protodeboronation of the boronate ester. Typically heteroaryl boronate esters are used in a larger excess to allow complete consumption of the aryl halide due to competitive protodeboronation (for example 1.5 eq of the alkyne (and thus boronate ester) was used in the one-pot borylative cyclisation cross-coupling).

## 9. Cyclisation of 2-alkynylthioanisoles

### 4,4,5,5-tetramethyl-2-(2-phenylbenzo[b]thiophen-3-yl)-1,3,2-dioxaborolane (**11a**)

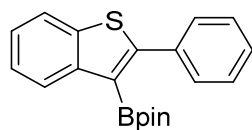

Prepared according to the general procedure. Alkyne **9a** (100 mg, 0.446 mmol, 1 eq.),  $\text{BCl}_3$  (0.56 mL, 0.560 mmol, 1.2 eq.), DCM (1 mL),  $\text{NEt}_3$  (1 mL) and pinacol (70 mg, 0.592 mmol, 1.3 eq.). Filtered through silica with pentane for purification. **11a** (57 mg, 38%) obtained as a white solid.  $^1\text{H}$  NMR (400 MHz,  $\text{CDCl}_3$ ):  $\delta$  1.35 (12H, s, *Bpin*); 7.30 - 7.37 (1H, m, *Ar-H*); 7.37 - 7.47 (4H, m, *Ar-H*); 7.60 - 7.68 (2H, m, *Ar-H*); 7.82 - 7.89 (1H, m, *Ar-H*); 8.22 - 8.29 (1H, m, *Ar-H*);  $^{13}\text{C}\{^1\text{H}\}$  NMR (100.6 MHz,  $\text{CDCl}_3$ ):  $\delta$  24.8, 83.6, 121.6, 124.0, 124.4, 125.2, 127.9, 128.4, 129.8, 135.4, 140.5, 144.8, 154.9;  $^{11}\text{B}$  NMR (128.6 MHz,  $\text{CDCl}_3$ ):  $\delta$  30.32 (s); [GC-MS]  $m/z$  calculated for  $\text{C}_{20}\text{H}_{21}\text{BO}_2\text{S}$ , 336.2; found 336.2. GC-MS retention times of analytes: 13.56 minutes: 4,4,5,5-tetramethyl-2-(2-phenylbenzo[b]thiophen-3-yl)-1,3,2-dioxaborolane; [Acc. Mass] Calculated  $[\text{M}+\text{H}]^+$ : 337.1428  $\text{g mol}^{-1}$ , Observed  $[\text{M}+\text{H}]^+$ : 337.1425  $\text{g mol}^{-1}$

### Modified procedure – with addition of $\text{NEt}_3$ / $\text{AlCl}_3$

Further investigations into the reaction involved the direct comparison of the *in-situ* NMR spectra between the sulphur and oxygen analogues. It was concluded that the thioanisole moiety was not demethylated *in-situ*, leading to the generation of a zwitterionic sulphonium intermediate **10**:

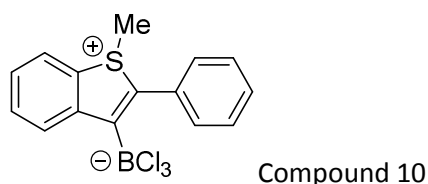

### Adapted procedure – $\text{NEt}_3$ followed by $\text{AlCl}_3$

In a J. Young's NMR tube, alkyne **9a** (56 mg, 0.249 mmol, 1 eq.), DCM (0.4 mL),  $\text{BCl}_3$  (0.55 mL, 0.55 mmol, 2.2 eq.) were added. An equivalent of  $\text{AlCl}_3$  (33 mg, 1 eq. 0.249 mmol) was added to abstract the chloride, followed by demethylation with an excess of  $\text{NEt}_3$  (0.5 mL) to generate the neutral thiophene- $\text{BCl}_2$  compound (presumably as the  $\text{Et}_3\text{N}$  adduct) and

[MeNEt<sub>3</sub>][AlCl<sub>4</sub>]. 3 equivalents of pinacol (88 mg, 0.747 mmol) were added with an excess used to ensure complete esterification of the borylated species (as pinacol also reacts with the AlCl<sub>4</sub>). This was purified via chromatography (20% DCM in 40-60 petroleum ether) to give the desired compound **11a** (57 mg, 68%).

4,4,5,5-tetramethyl-2-(2-(naphthalen-1-yl)benzo[b]thiophen-3-yl)-1,3,2-dioxaborolane (**11b**)

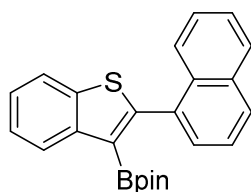

Prepared according to the general procedure using a J. Young's NMR tube. Alkyne **9b** (10 mg, 0.036 mmol, 1 eq.), BCl<sub>3</sub> (0.44 mL, 0.440 mmol, 1.2 eq.), DCM (0.5 mL), NEt<sub>3</sub> (0.5 mL) and pinacol (5 mg, 0.042 mmol, 1.2 eq.). Purified via preparative TLC (Eluent: 30% DCM in 40-60 petroleum ether). **11b** (7 mg, 48%) obtained as a white solid. <sup>1</sup>H NMR (400 MHz, CDCl<sub>3</sub>): δ 0.98 (12H, s, Bpin); 7.34 - 7.55 (5H, m, Ar-H); 7.61 (1H, dd, J = 6.9 Hz, 1.1 Hz, Ar-H); 7.87-7.93 (4H, m, Ar-H); 8.32 (1H, d, J = 7.9 Hz, Ar-H); <sup>13</sup>C{<sup>1</sup>H} NMR (100.6 MHz, CDCl<sub>3</sub>): δ 24.5, 83.1, 121.6, 124.1, 124.5, 124.7, 125.2, 125.6, 126.16, 126.21, 127.9, 128.2, 128.6, 133.1, 133.3, 133.6, 140.9, 144.0, 152.8; <sup>11</sup>B NMR (128.6MHz, CDCl<sub>3</sub>); δ 30.2 (s); [GC-MS] *m/z* calculated for C<sub>24</sub>H<sub>23</sub>BO<sub>2</sub>S, 386.2; found 386.2. GC-MS retention times of analytes: 15.22 minutes: 4,4,5,5-tetramethyl-2-(2-(naphthalen-1-yl)benzo[b]thiophen-3-yl)-1,3,2-dioxaborolane; [Acc. Mass] Calculated [M+H]<sup>+</sup>: 387.1585 g mol<sup>-1</sup>, Observed [M+H]<sup>+</sup>: 387.1585 g mol<sup>-1</sup>

Following the previously described adapted procedure (AlCl<sub>3</sub> followed by NEt<sub>3</sub>), Alkyne **9b** (29 mg, 0.106 mmol, 1 eq.), DCM (0.4 mL), BCl<sub>3</sub> (0.23 mL, 0.23 mmol, 2.2 eq.), AlCl<sub>3</sub> (14 mg, 0.106 mmol, 1 eq.), NEt<sub>3</sub> (0.5 mL), pinacol (38 mg, 0.318 mmol, 3eq.). Purified via chromatography (20% DCM in 40-60 petroleum ether) to give a higher yield of **11b** (30 mg, 73%).

### 2-(2-mesitylbenzo[b]thiophen-3-yl)-4,4,5,5-tetramethyl-1,3,2-dioxaborolane (**11c**)

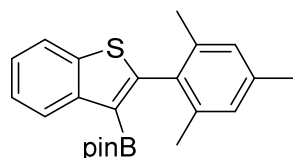

Prepared according to the general procedure. Alkyne **9c** (26 mg, 0.098 mmol, 1 eq.), BCl<sub>3</sub> (0.12 mL, 0.120 mmol, 1.2 eq.), DCM (0.5 mL), NEt<sub>3</sub> (0.5 mL) and pinacol (14 mg, 0.120 mmol, 1.2 eq.). Filtered through silica with pentane for purification. **11c** (30 mg, 82%) obtained as a white solid. <sup>1</sup>H NMR (400 MHz, CDCl<sub>3</sub>): δ 1.17 (12H, s, Bpin); 2.11 (6H, s, Ar-Ph(*o*-CH<sub>3</sub>)<sub>2</sub>); 2.36 (3H, s, Ar-Ph(*p*-CH<sub>3</sub>)); 6.92 (2H, s, Mes-*H*); 7.31-7.37 (1H, m, Ar-*H*); 7.39-7.44 (1H, m, Ar-*H*); 7.86 (1H, dt, J = 8.1 Hz, 0.8 Hz, Ar-*H*); 8.30 (1H, dq, J = 7.3 Hz, 0.8 Hz); <sup>13</sup>C{<sup>1</sup>H} NMR (100.6 MHz, CDCl<sub>3</sub>): δ 20.4, 21.2, 24.6, 82.9, 121.7, 123.7, 124.1, 125.1, 127.4, 132.1, 137.4, 141.1, 144.2, 154.7; <sup>11</sup>B NMR (128.6 MHz, CDCl<sub>3</sub>): δ 29.2 (s); [GC-MS] *m/z* calculated for C<sub>23</sub>H<sub>27</sub>BO<sub>2</sub>S, 378.3; found 378.3. GC-MS retention times of analytes: 16.8 minutes: 2-(2-mesitylbenzo[b]thiophen-3-yl)-4,4,5,5-tetramethyl-1,3,2-dioxaborolane; [Acc. Mass] Calculated [M]<sup>+</sup>: 378.1825 gmol<sup>-1</sup>, Observed [M]<sup>+</sup>: 378.1824 gmol<sup>-1</sup>

### 4,4,5,5-tetramethyl-2-(2-(thiophen-3-yl)benzo[b]thiophen-3-yl)-1,3,2-dioxaborolane (**11d**)

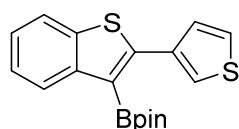

Prepared according to the general procedure. Alkyne **9d** (62 mg, 0.269 mmol, 1 eq.), BCl<sub>3</sub> (0.33 mL, 0.330 mmol, 1.2 eq.), DCM (1 mL), NEt<sub>3</sub> (1 mL) and pinacol (34 mg, 0.287 mmol, 1.2 eq.). Filtered through silica with pentane for purification. **11d** (49 mg, 55%) obtained as a white solid. <sup>1</sup>H NMR (400 MHz, CDCl<sub>3</sub>): δ 1.39 (12H, s, Bpin); 7.28-7.42 (3H, m, Ar-*H*); 7.44 (1H, dd, J = 5.0 Hz, 1.3 Hz, Ar-*H*); 7.69 (1H, dd, J = 3.0 Hz, 1.3 Hz, Ar-*H*); 7.81 (1H, d, J = 7.8 Hz, Ar-*H*); 8.25 (1H, d, J = 8.3 Hz, Ar-*H*); <sup>13</sup>C{<sup>1</sup>H} NMR (100.6 MHz, CDCl<sub>3</sub>): δ 24.9, 83.7, 121.5, 124.1, 124.5, 124.7, 124.9, 125.2, 129.3, 135.9, 139.8, 144.9, 148.9; <sup>11</sup>B NMR (128.6 MHz, CDCl<sub>3</sub>): δ 30.0 (s); [GC-MS] *m/z* calculated for C<sub>18</sub>H<sub>19</sub>BO<sub>2</sub>S<sub>2</sub>, 342.1; found 342.1. GC-MS retention times of analytes: 13.75 minutes: 4,4,5,5-tetramethyl-2-(2-(thiophen-3-

yl)benzo[b]thiophen-3-yl)-1,3,2-dioxaborolane; [Acc. Mass] Calculated  $[M+H]^+$ : 343.0992  $\text{g mol}^{-1}$ , Observed  $[M+H]^+$ : 343.0991  $\text{g mol}^{-1}$

*Attempts using the adapted procedure involving addition of  $\text{AlCl}_3$  /  $\text{Et}_3\text{N}$  prior to pinacol led to complex mixtures containing intractable material, this is attributed to  $\text{AlCl}_3$  reacting with the alpha thienyl positions.*

## 10. In-situ NMR Spectra

Anisole + BCl<sub>3</sub> (*in situ*) – 20 minutes vs 30 hours

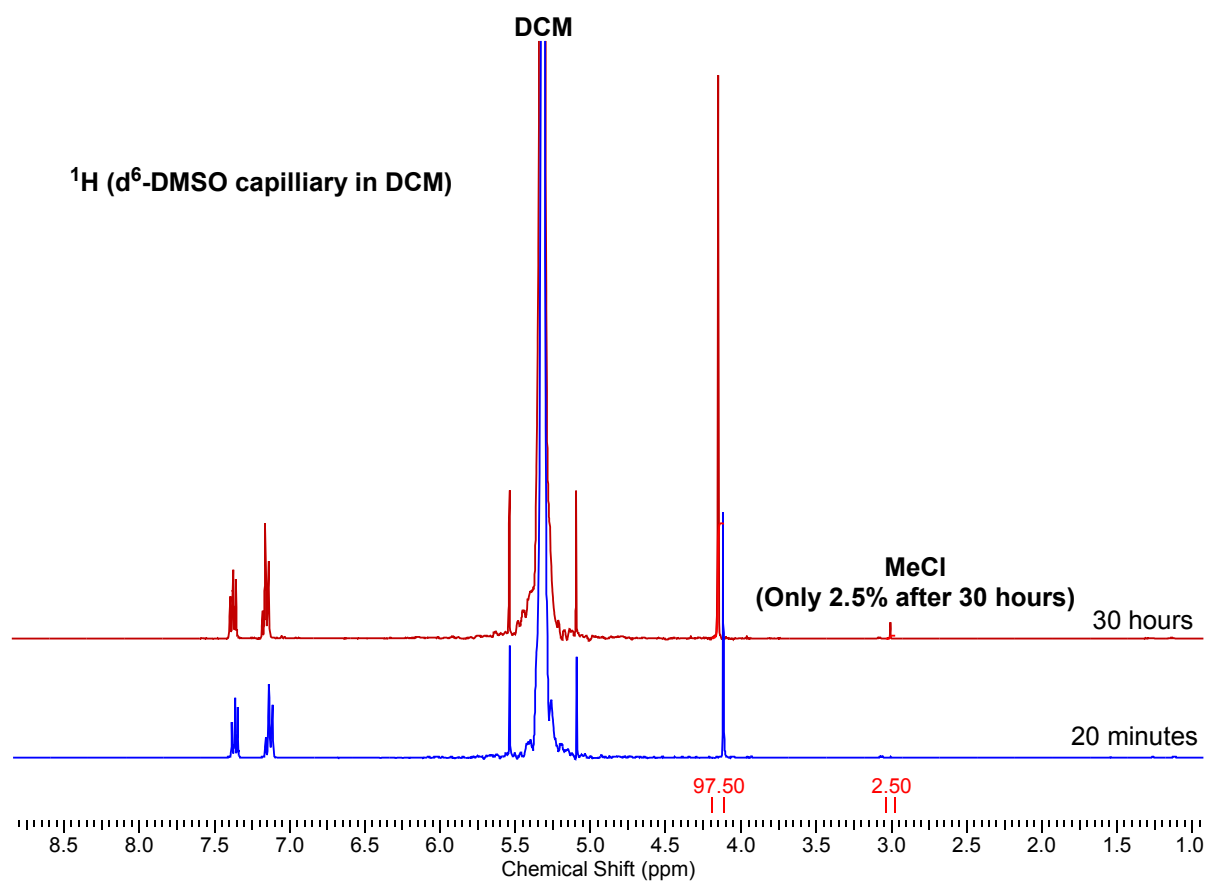

<sup>11</sup>B (d<sup>6</sup>-DMSO capillary in DCM)

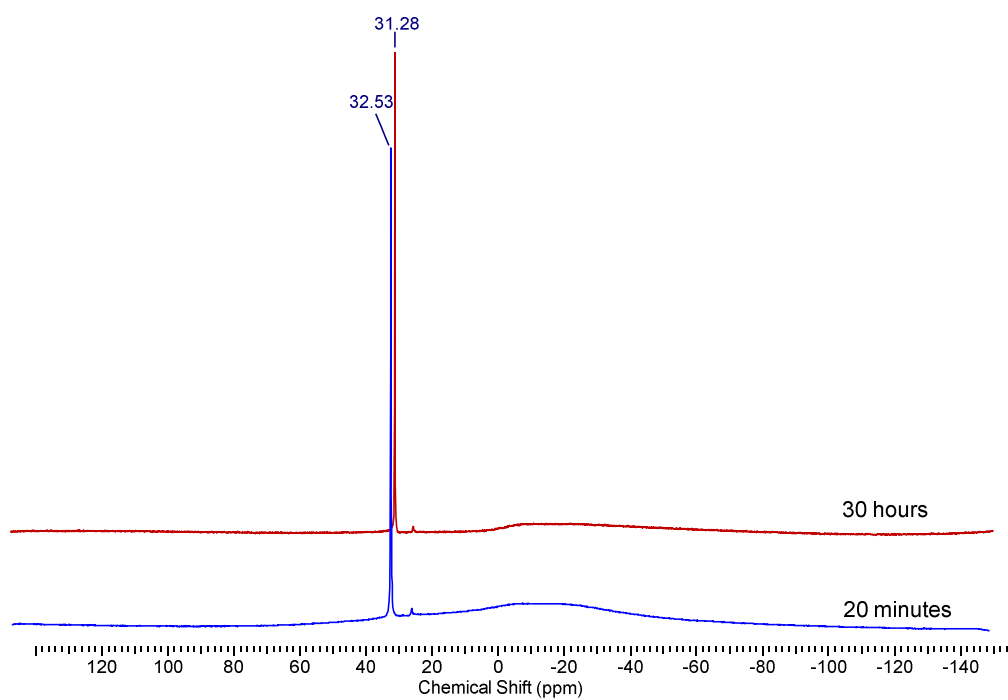

## In Situ Spectra prior to esterification to form (4a)

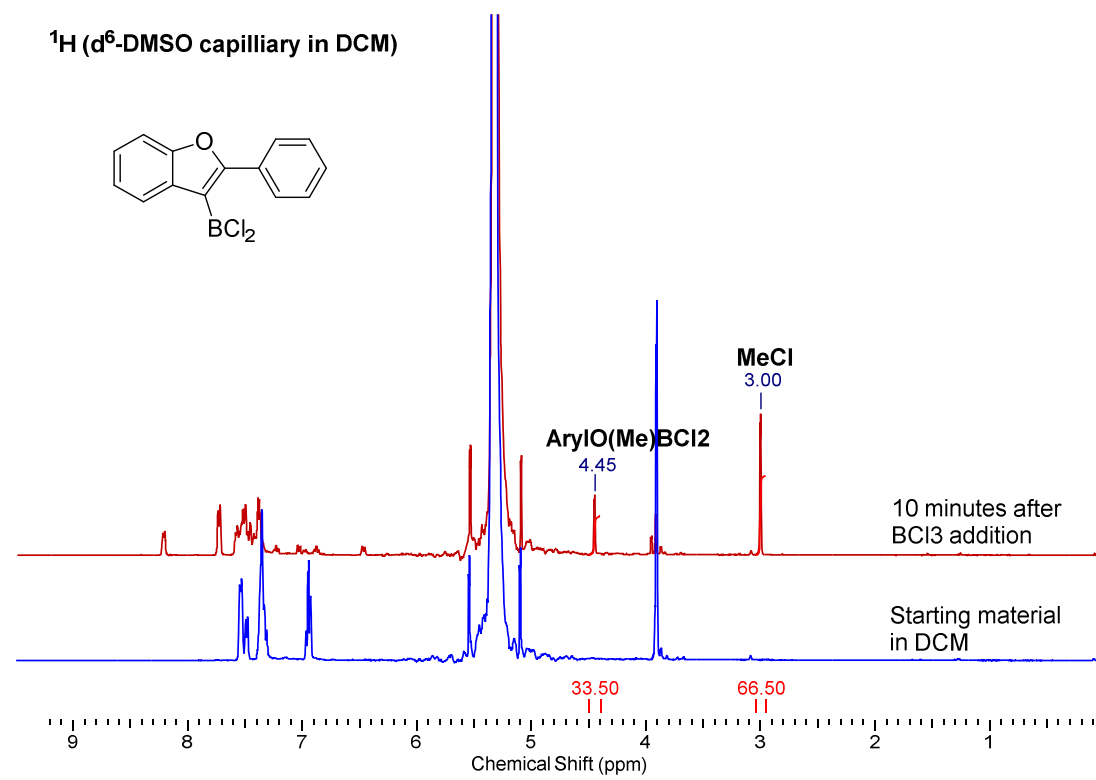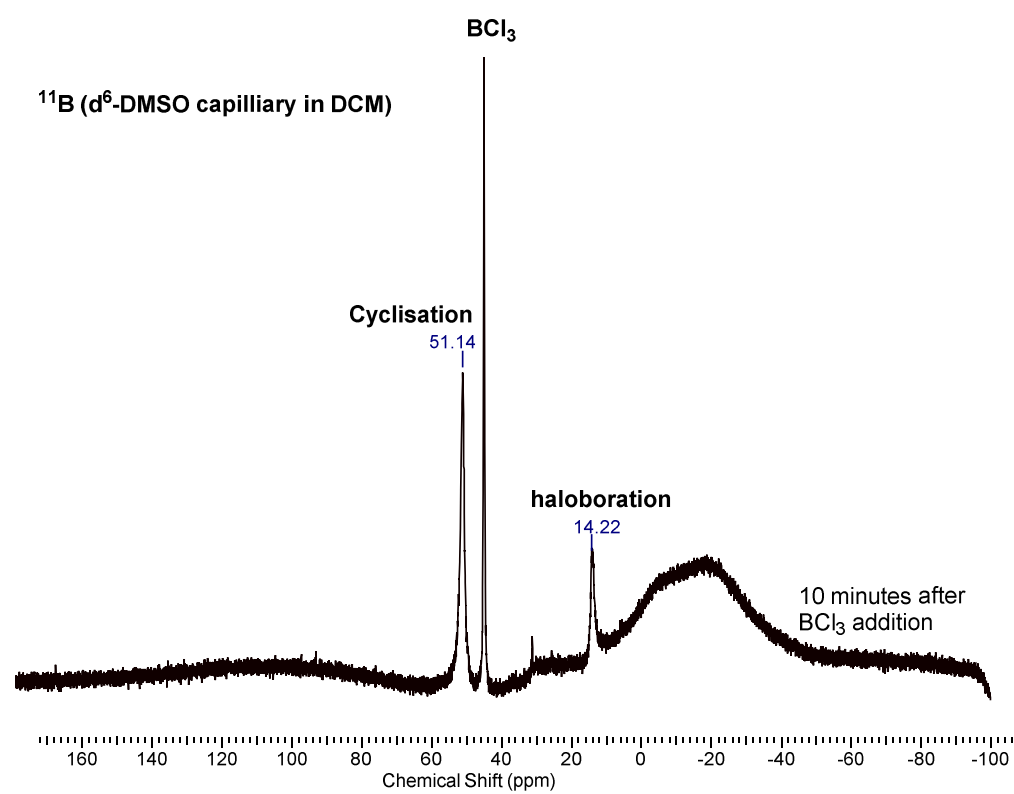



## Transhaloboration / Demethylation with 1,2-bis(2-methoxyphenyl)ethyne

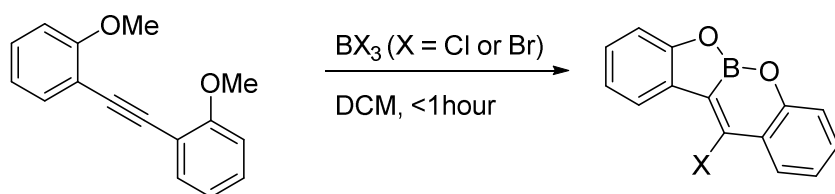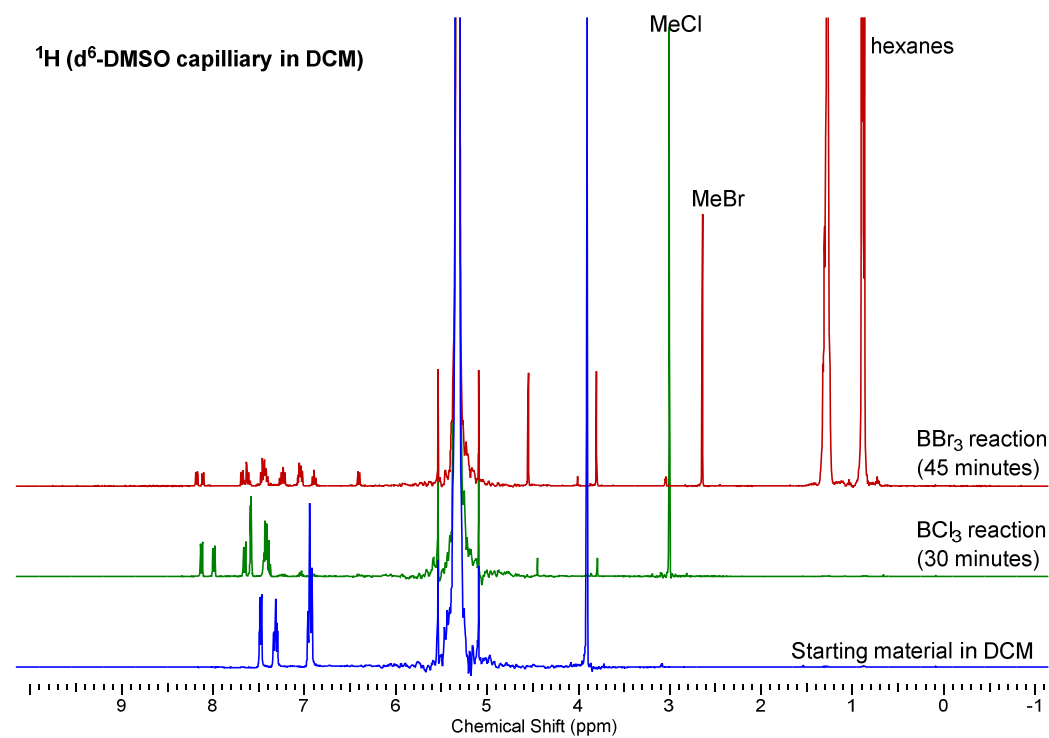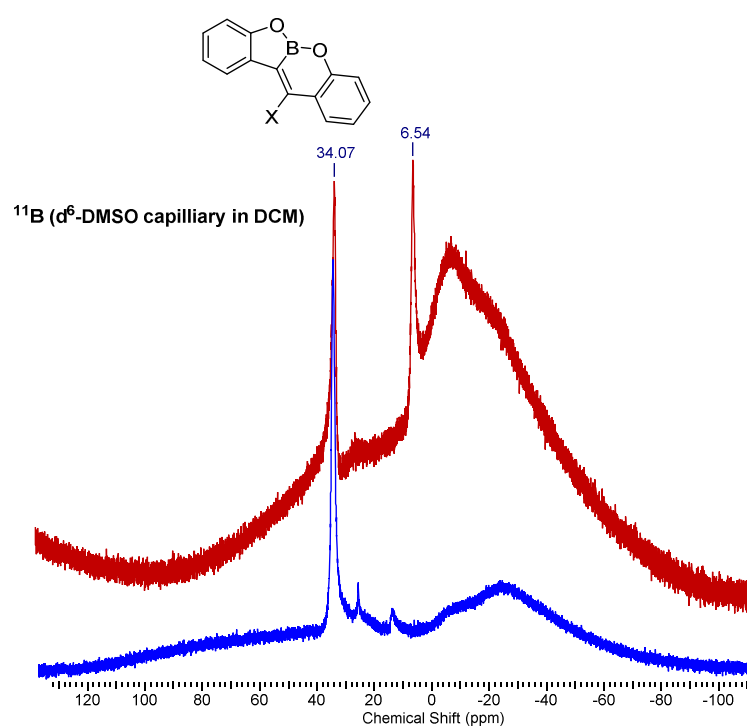

**The  $\delta_{11\text{B}}$  34 ppm species is fully consistent with a VinylB(OR)<sub>2</sub> species. The similar chemical shifts using BCl<sub>3</sub> and BBr<sub>3</sub> supports similar products being made consistent with trans-haloboration / demethylation. The formation of benzofuranBX<sub>2</sub> (X = Br or Cl) species would lead to different <sup>11</sup>B chemical shifts. Furthermore the reaction with BCl<sub>3</sub> results in MeCl being the major product consistent with 2 demethylation steps. The other species observed using BBr<sub>3</sub> is currently unknown.**

## In situ Oxygen-directed trans-haloboration using 3i

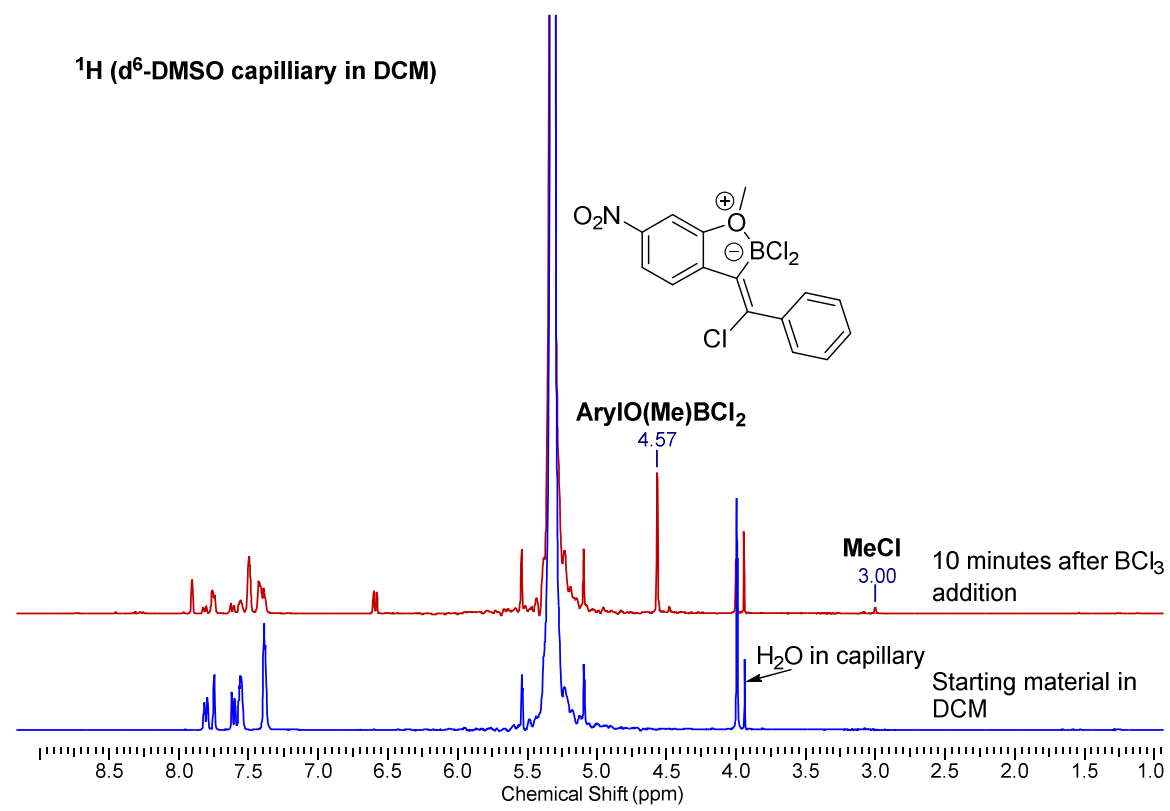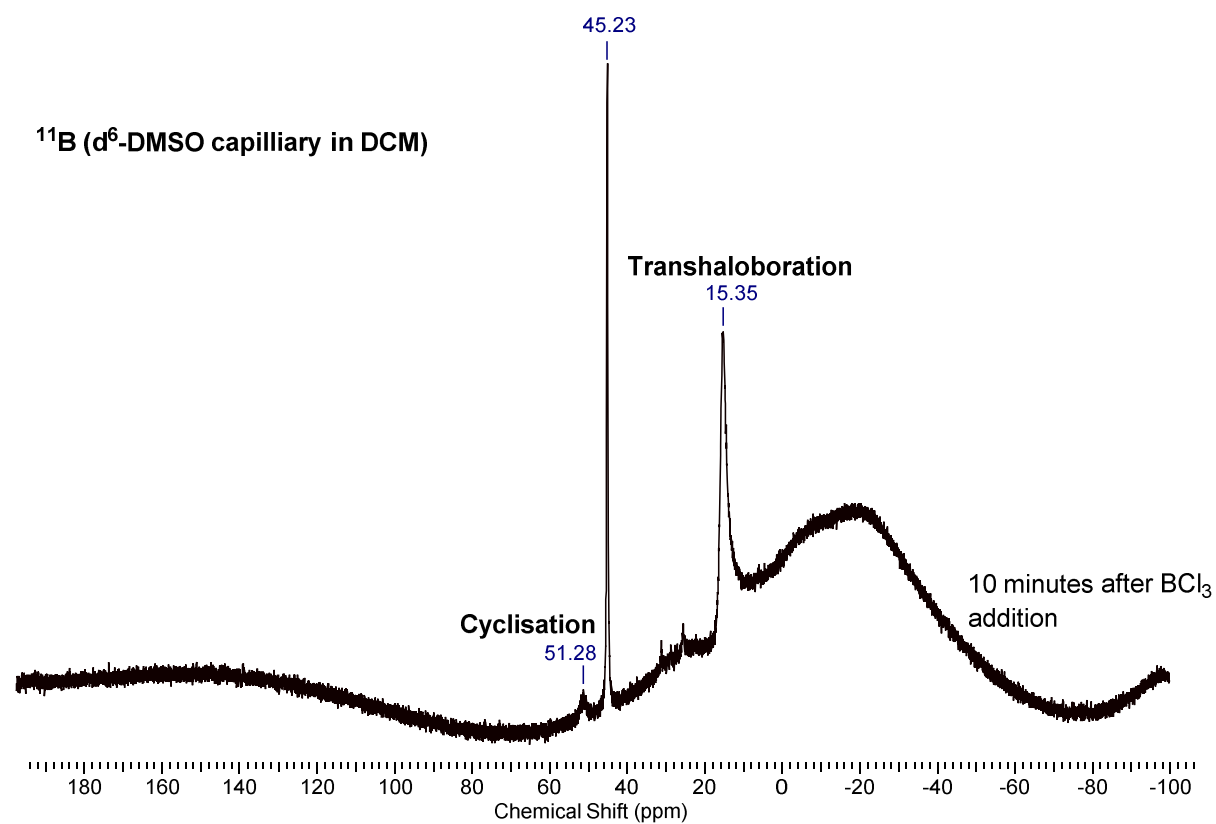

## In situ Oxygen-directed trans-haloboration using 3j

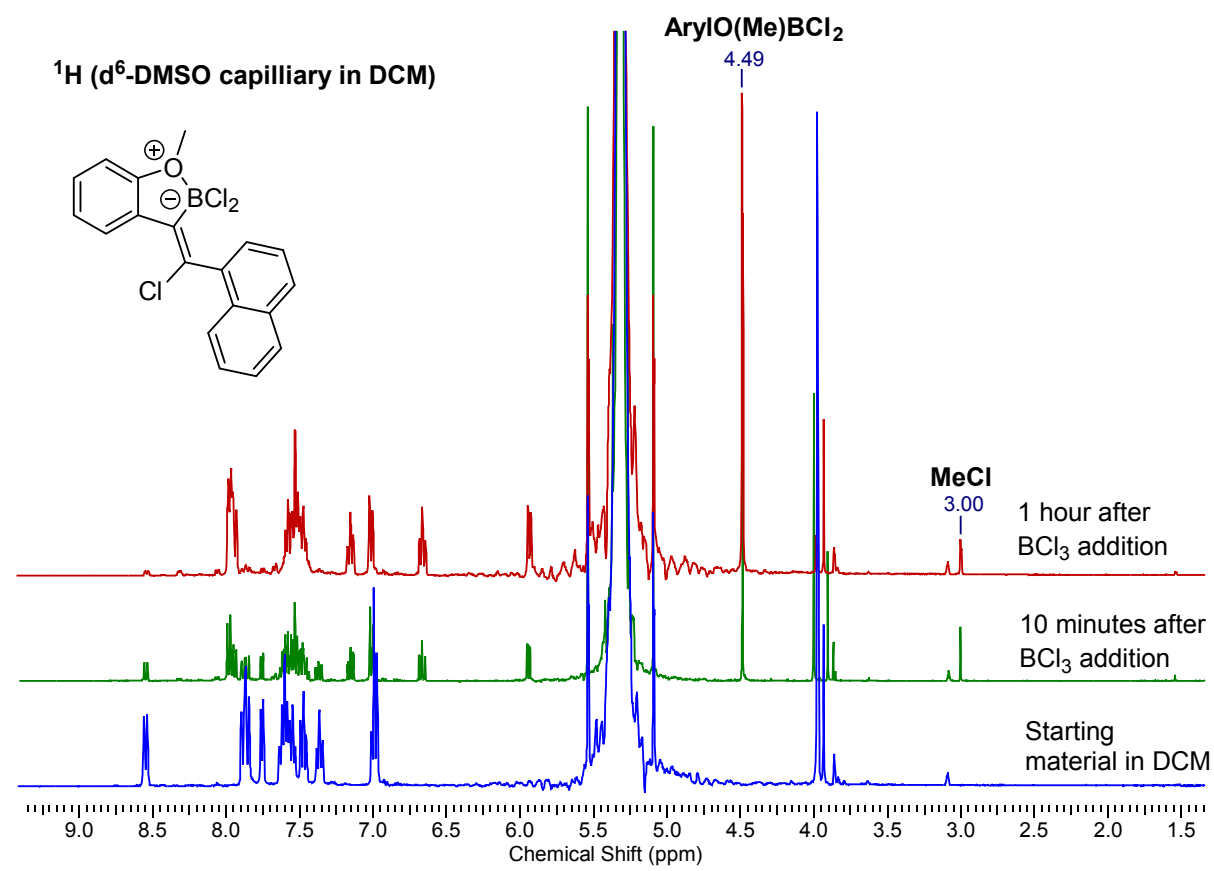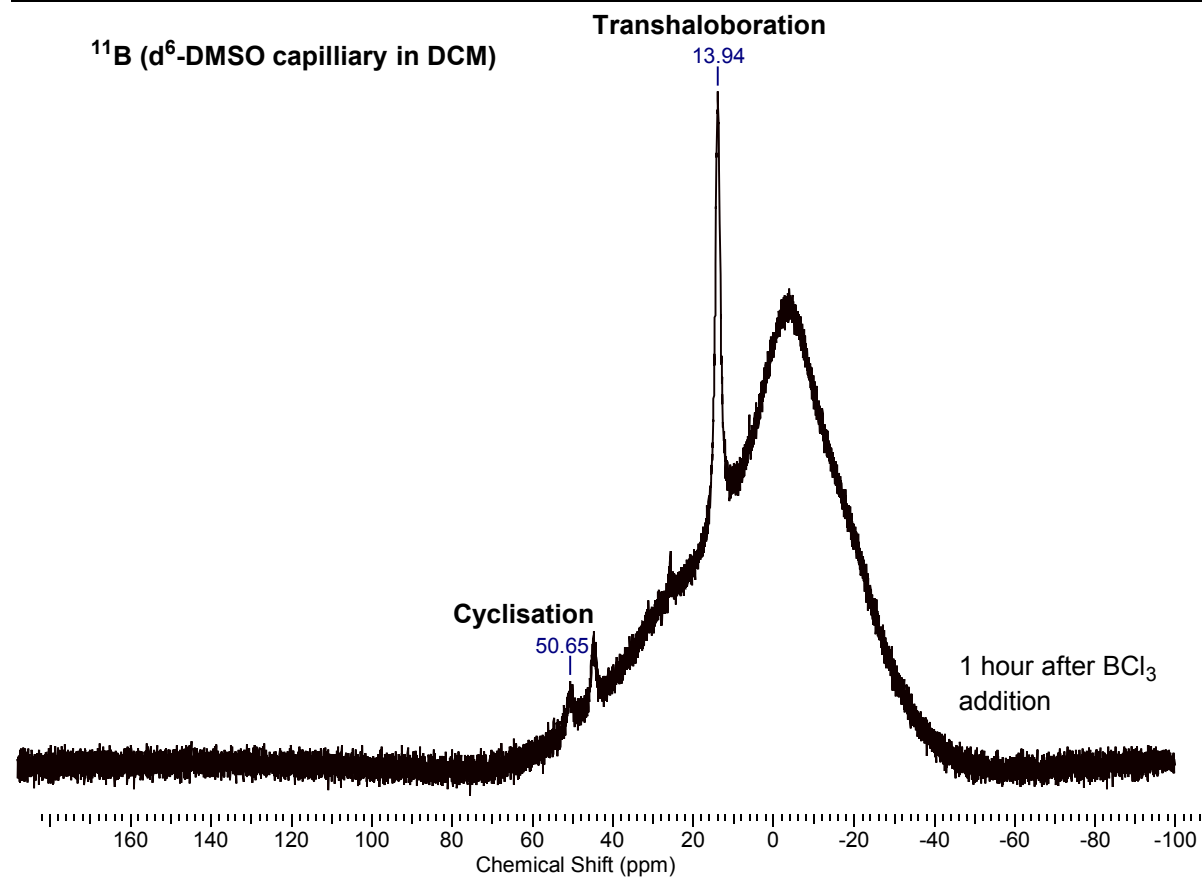

**In situ Thioanisole + BCl<sub>3</sub> after 30 minutes- no MeCl formed.**

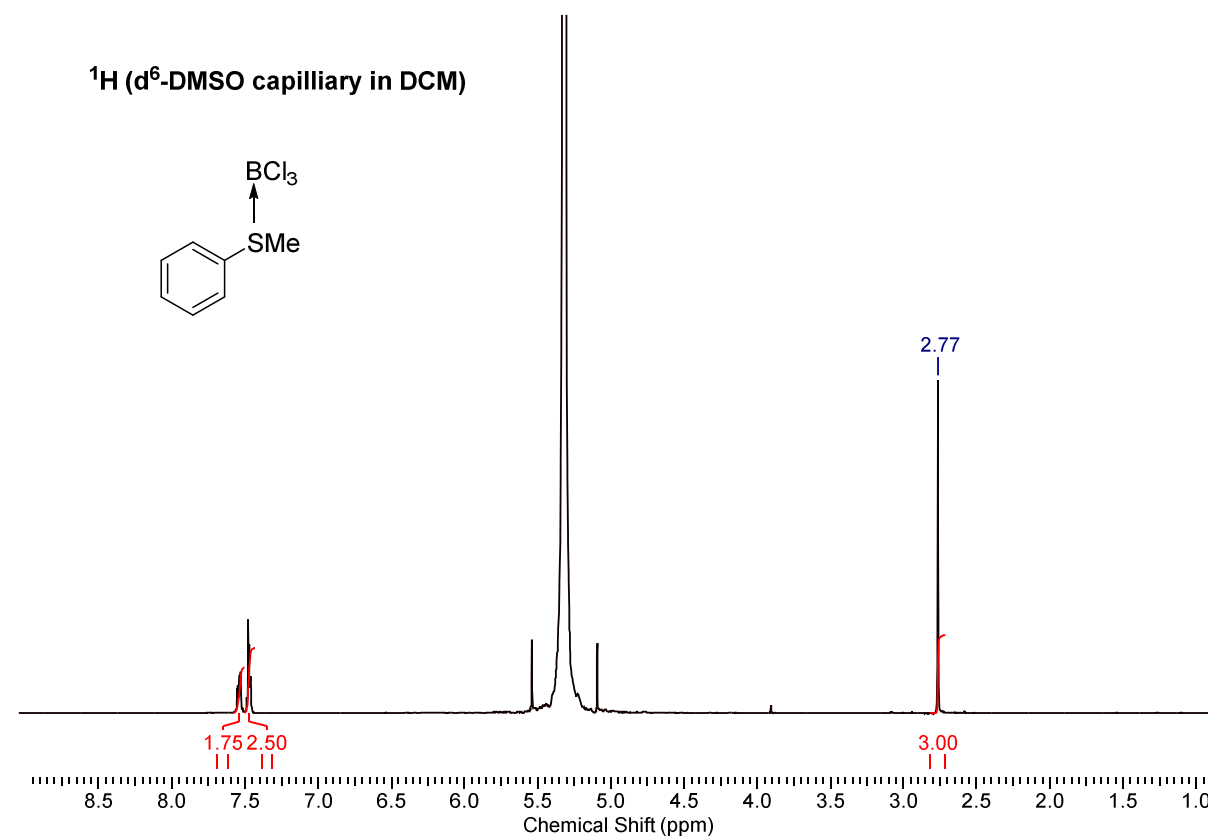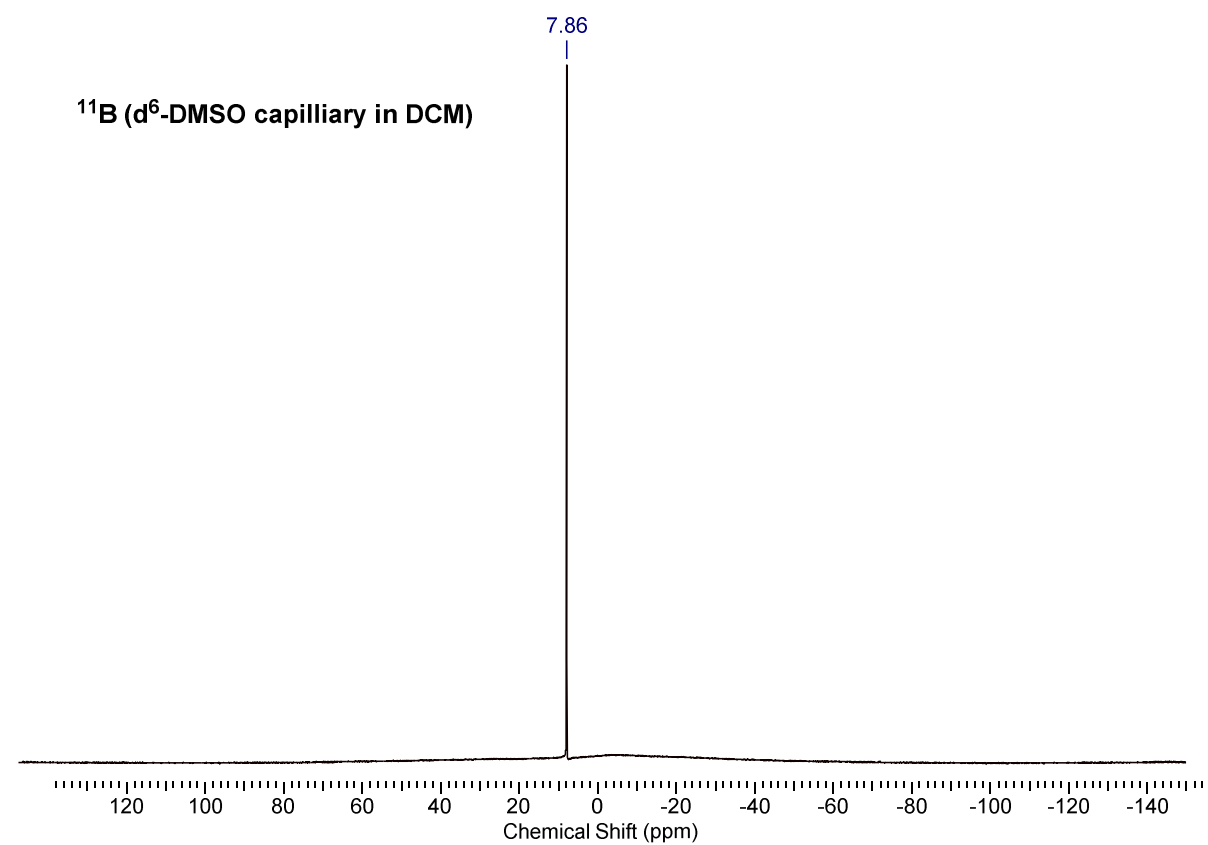

**In situ reaction of  $\text{NEt}_3/\text{AlCl}_3$  procedure to generate Methyl(2-(phenylethynyl)phenyl)sulfane (11a)**

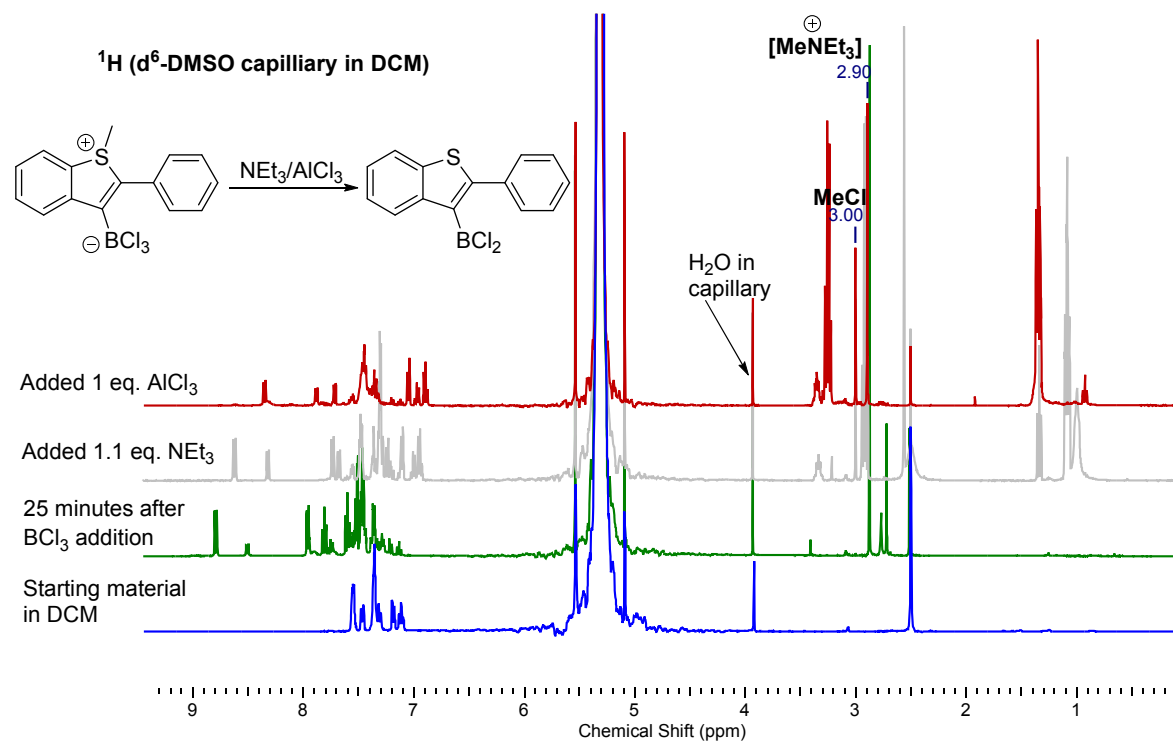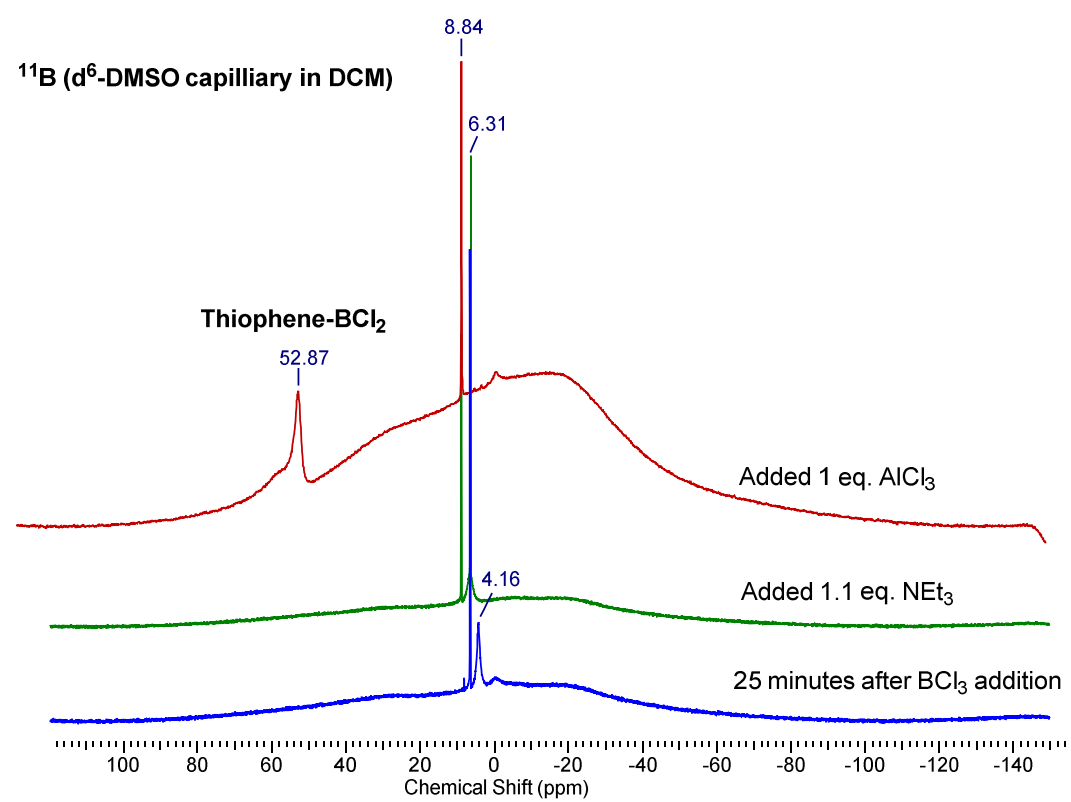

The shoulder at 55 ppm is tentatively attributed  $[\text{benzothiophenylBCl}(\text{NEt}_3)]^+$ .

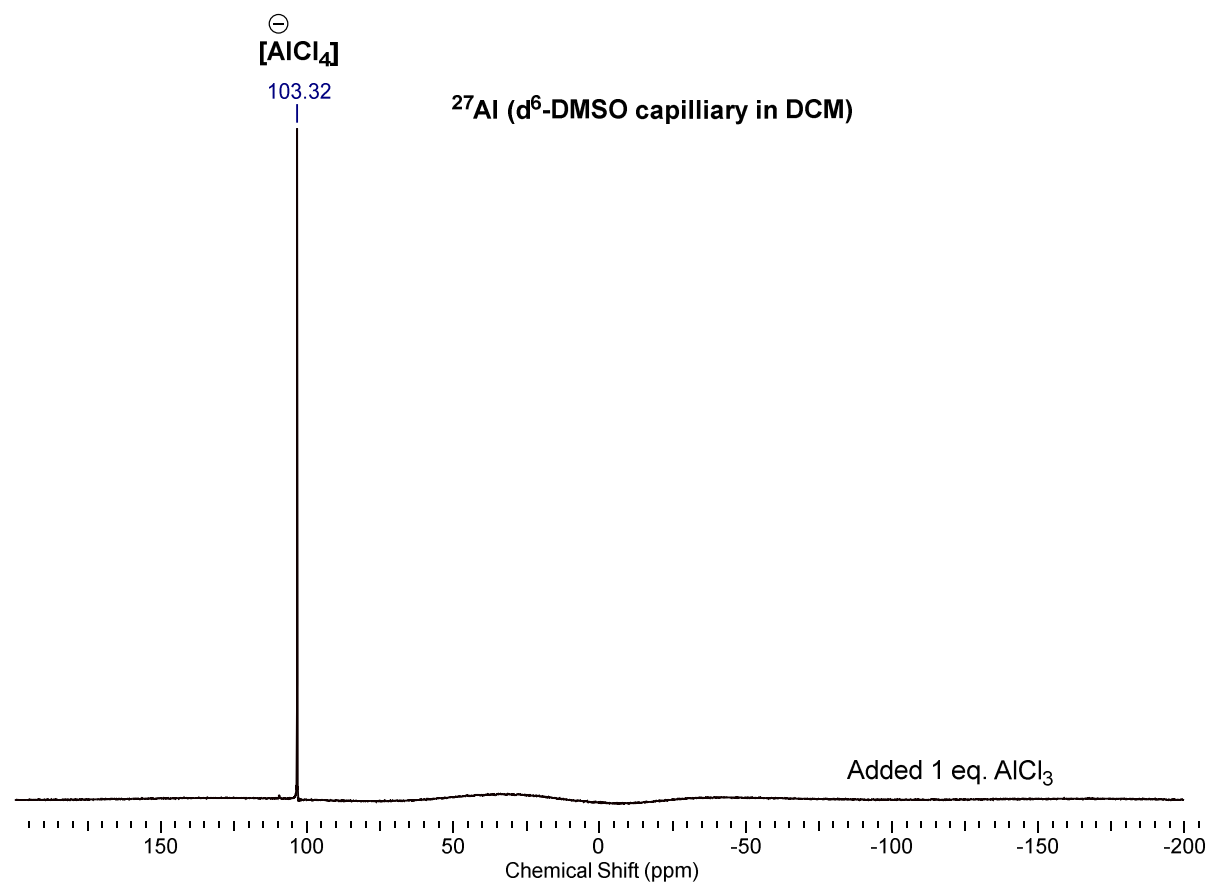

**In situ reaction of  $AlCl_3/NEt_3$  procedure to generate Methyl(2-(phenylethynyl)phenyl)sulfane (11a)**

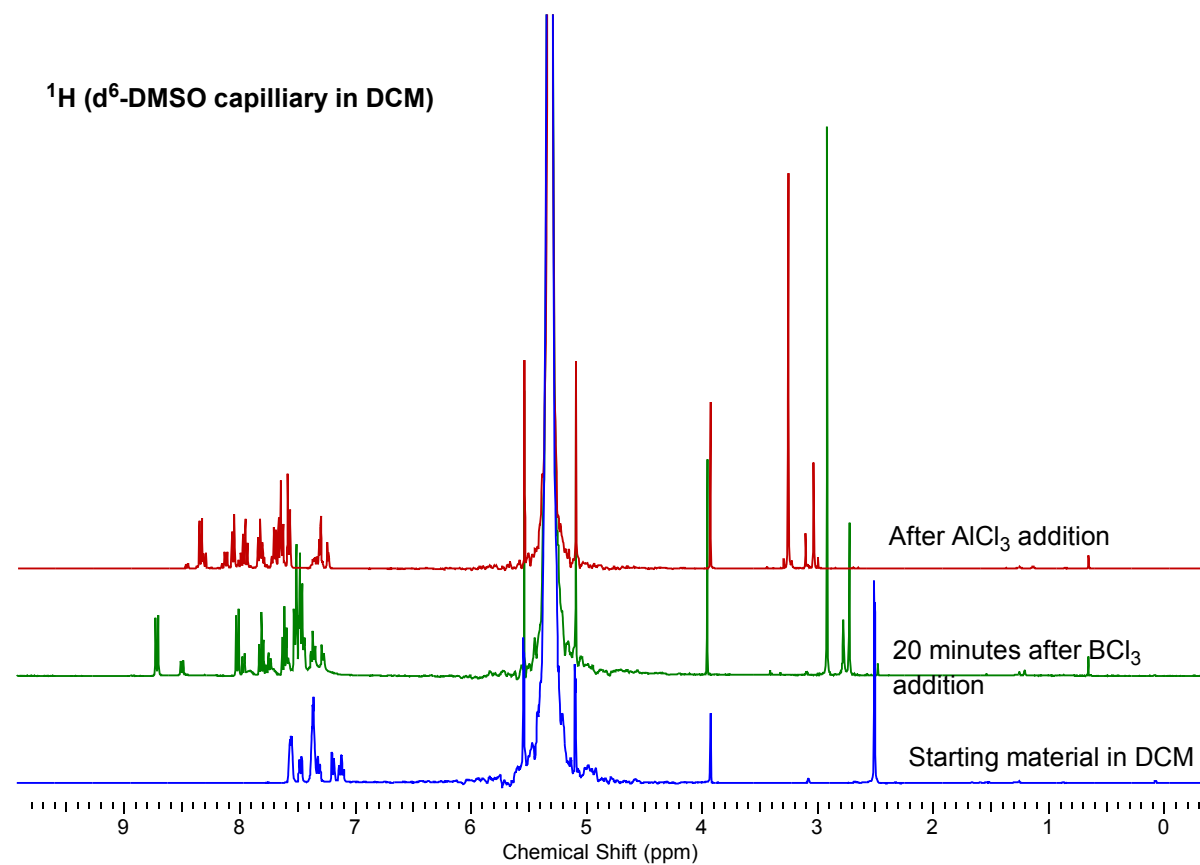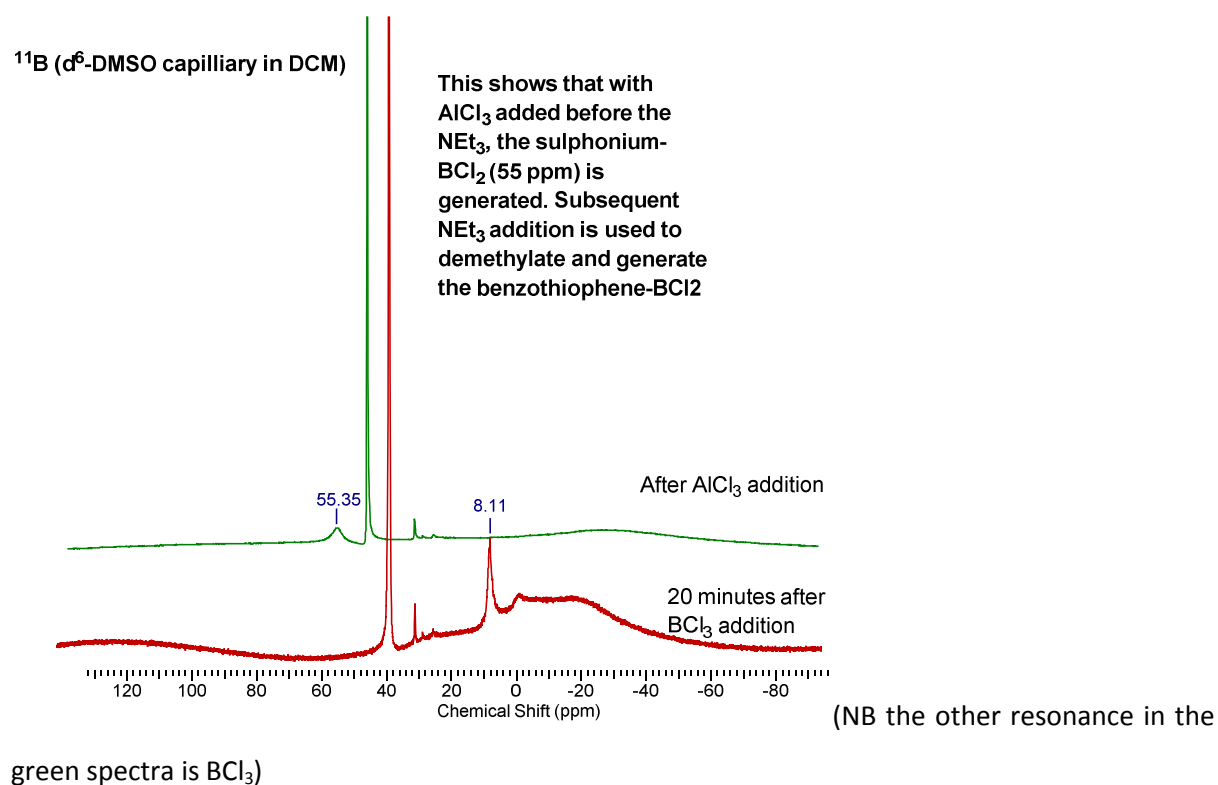

$^{27}\text{Al}$  ( $\text{d}^6\text{-DMSO}$  capillary in DCM)

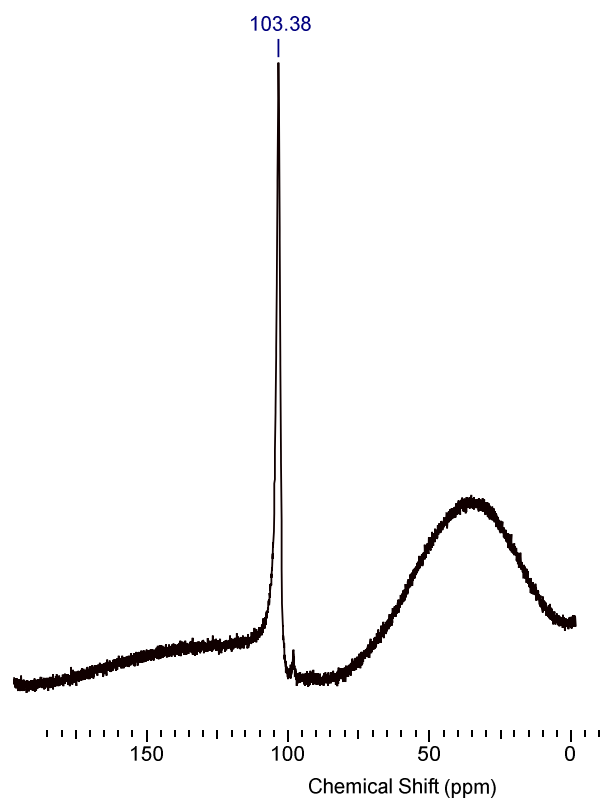



## 11. Spectral Data on Isolated Compounds

### N,N-dimethyl-2-(phenylethynyl)aniline (1)

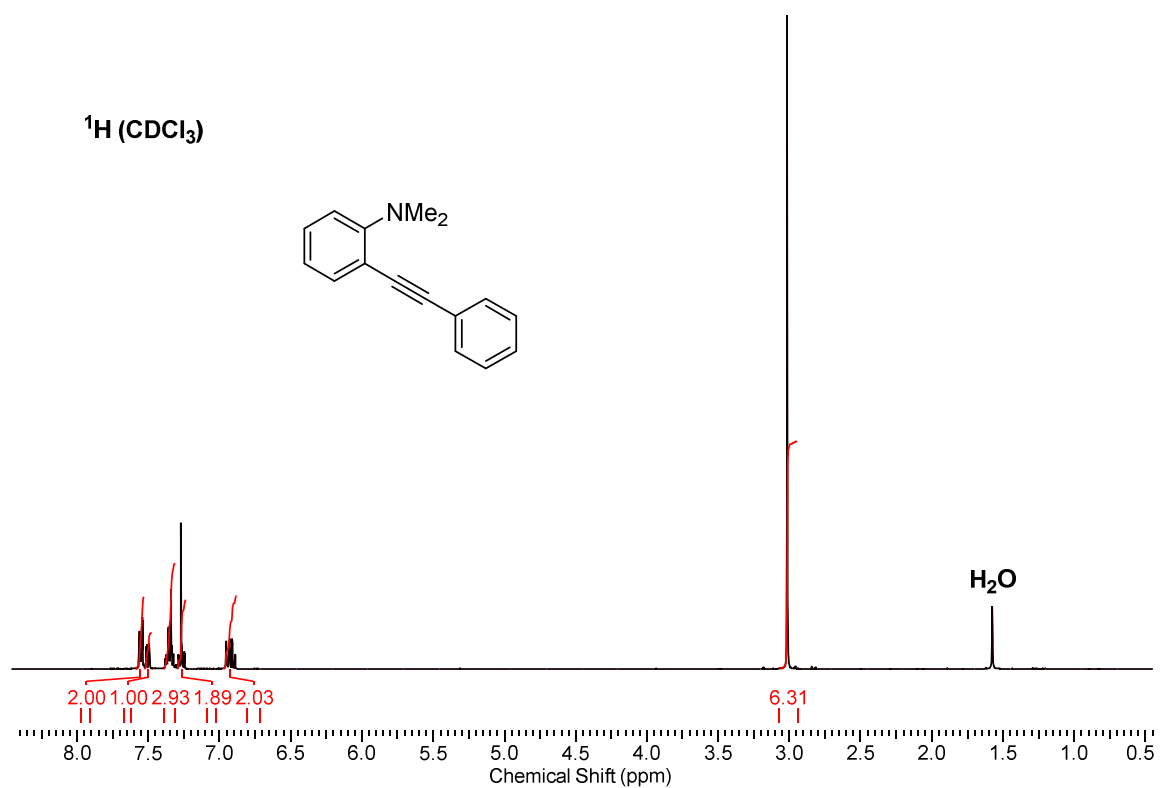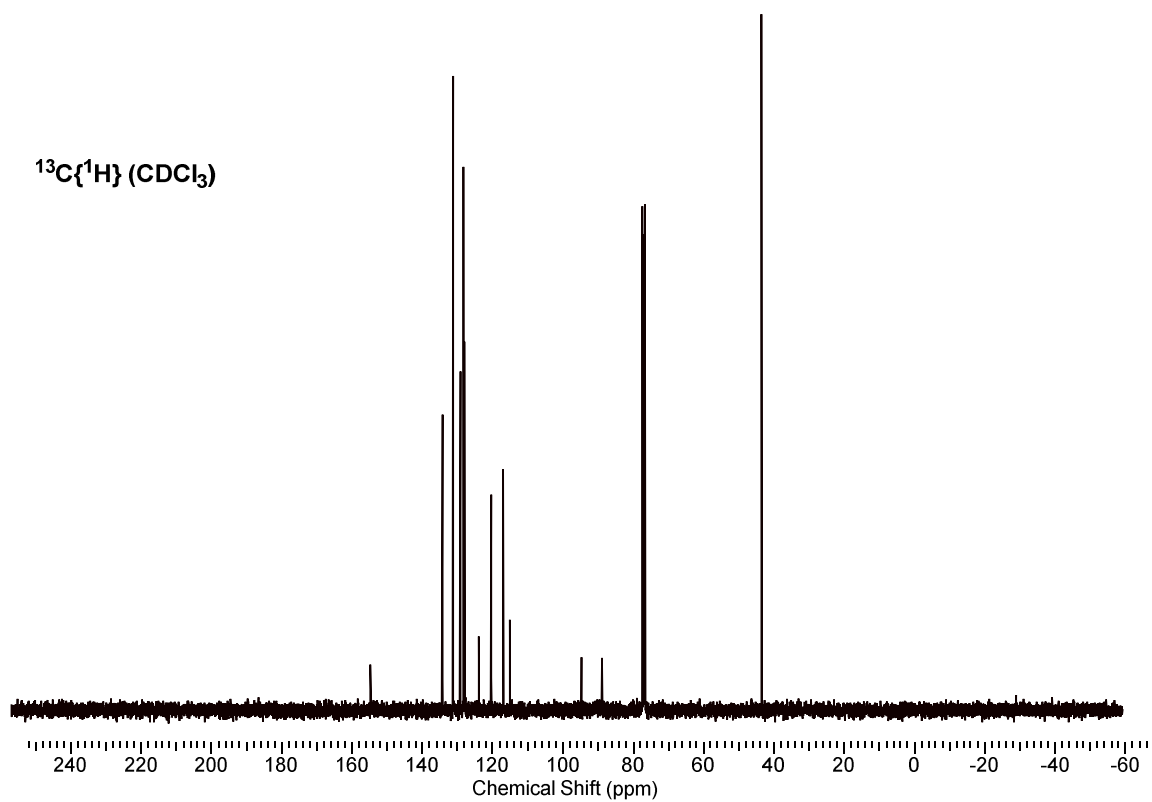

Nitrogen-directed *trans*-haloboration (2)

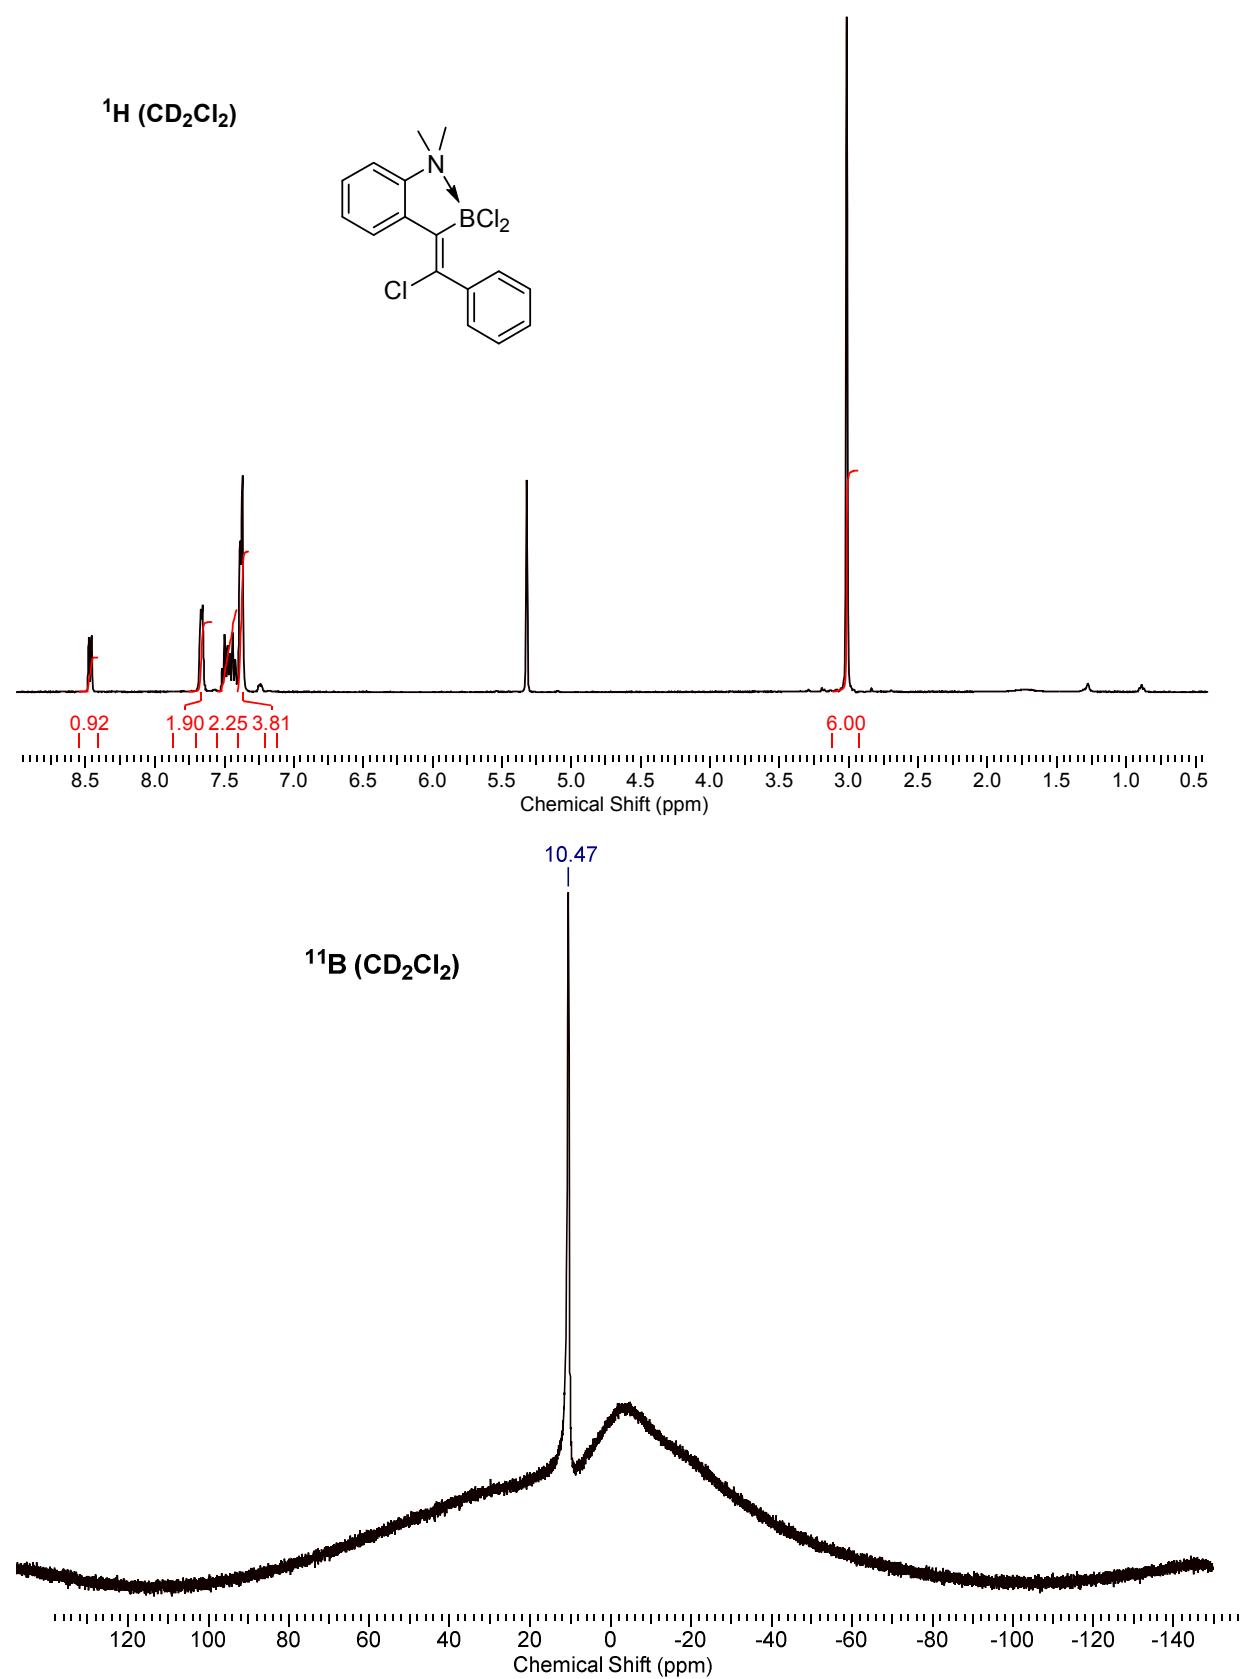

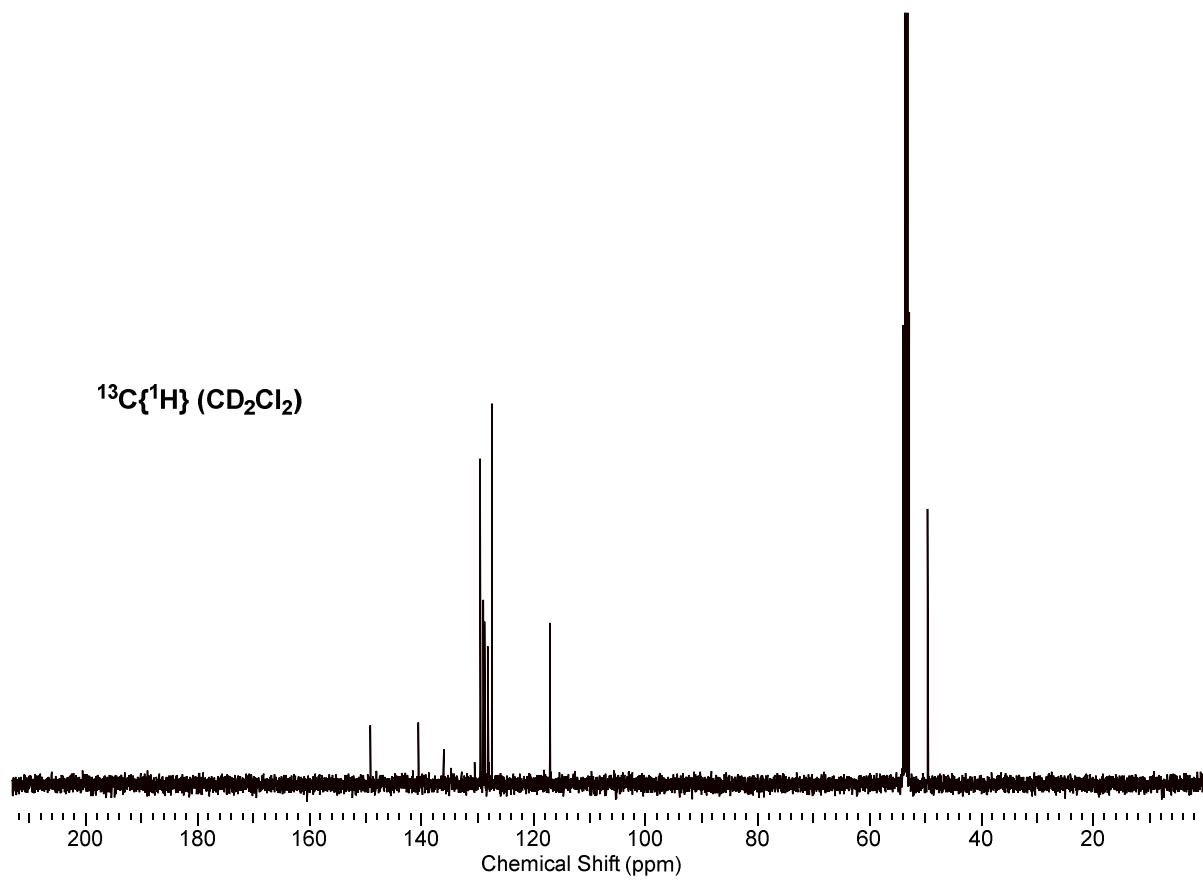

1-methoxy-2-(phenylethynyl)benzene (3a)

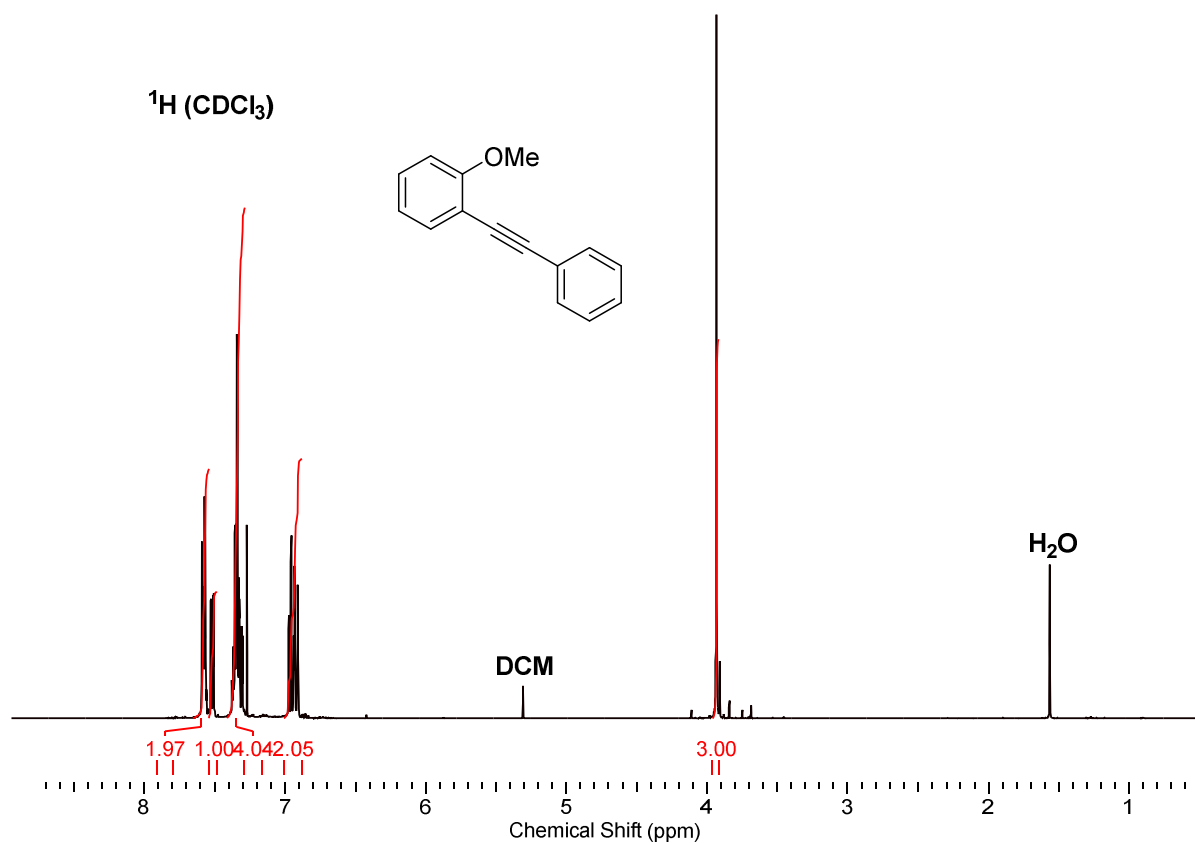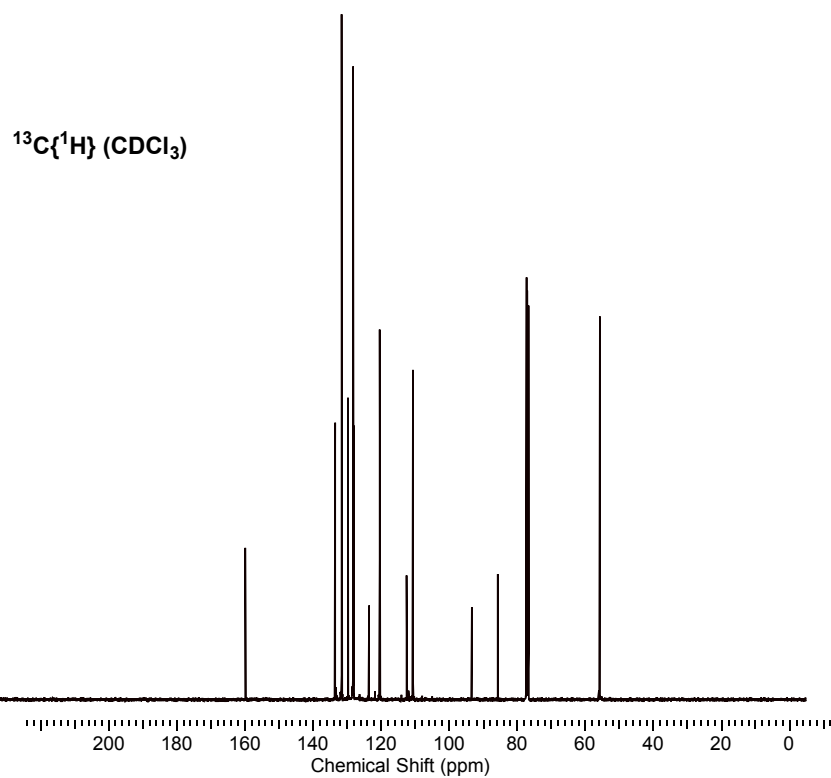

1-methoxy-4-methyl-2-(phenylethynyl)benzene (3b)

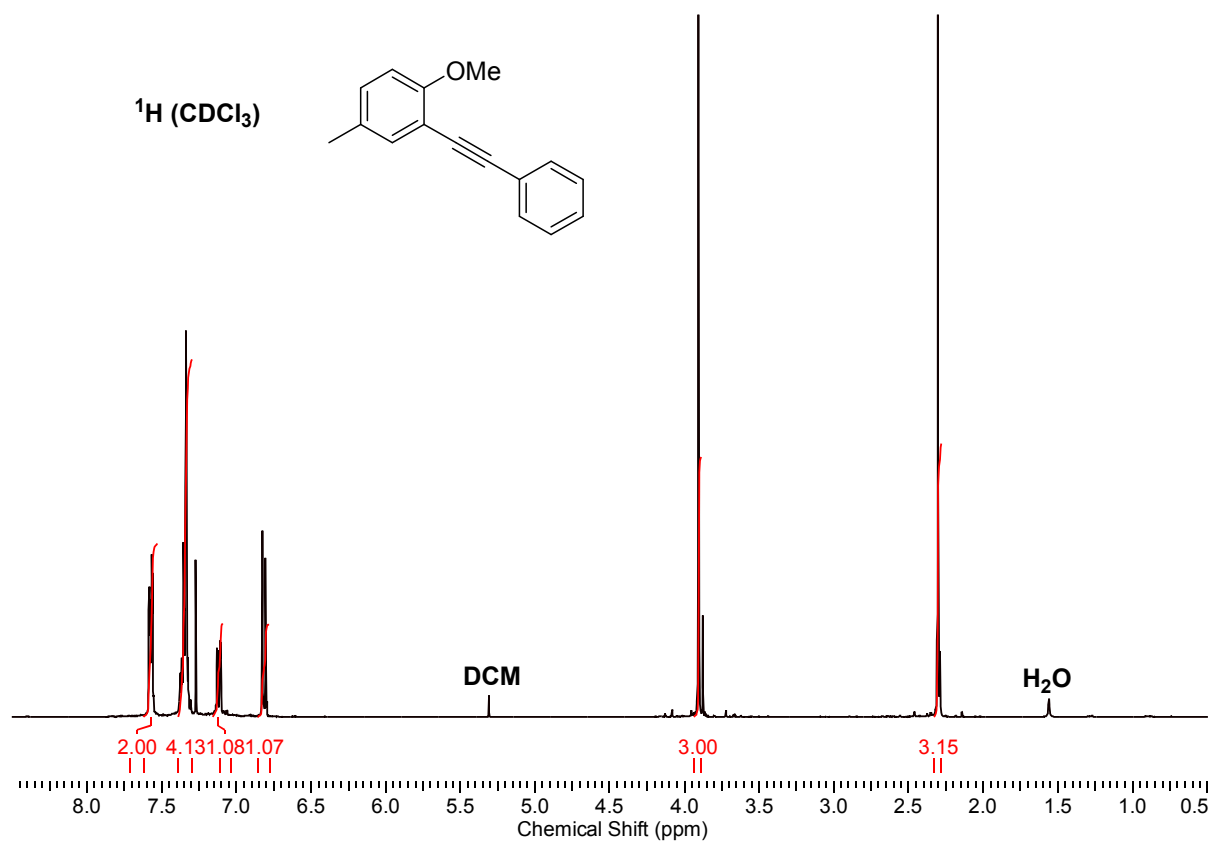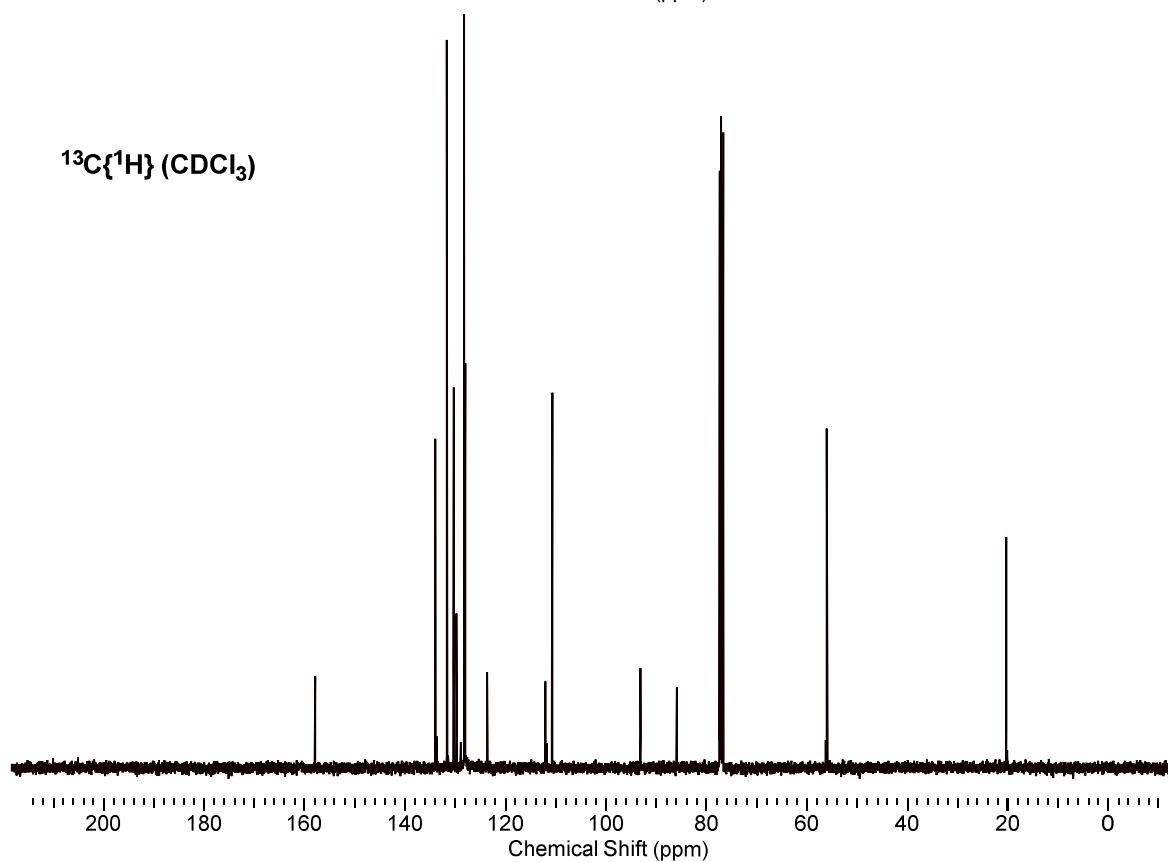

4-chloro-1-methoxy-2-(phenylethynyl)benzene (3c)

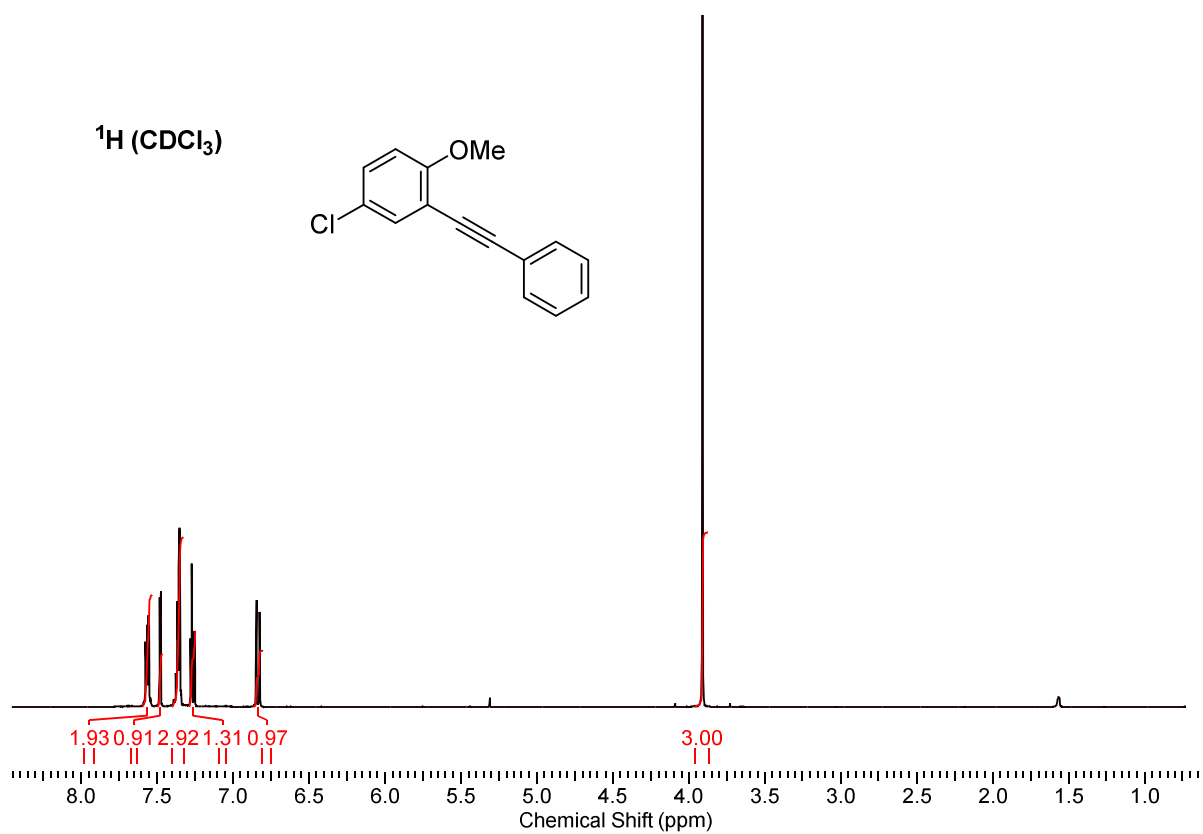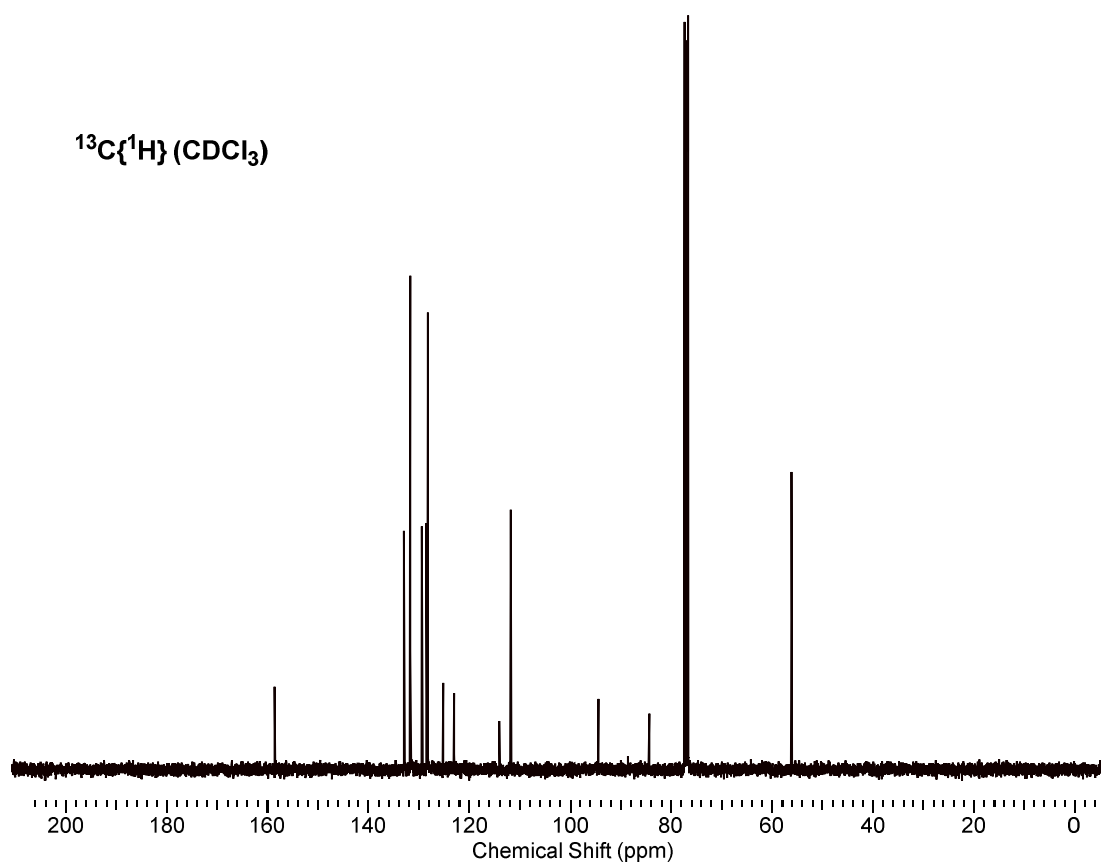

1-fluoro-2-methoxy-3-(phenylethynyl)benzene (3d)

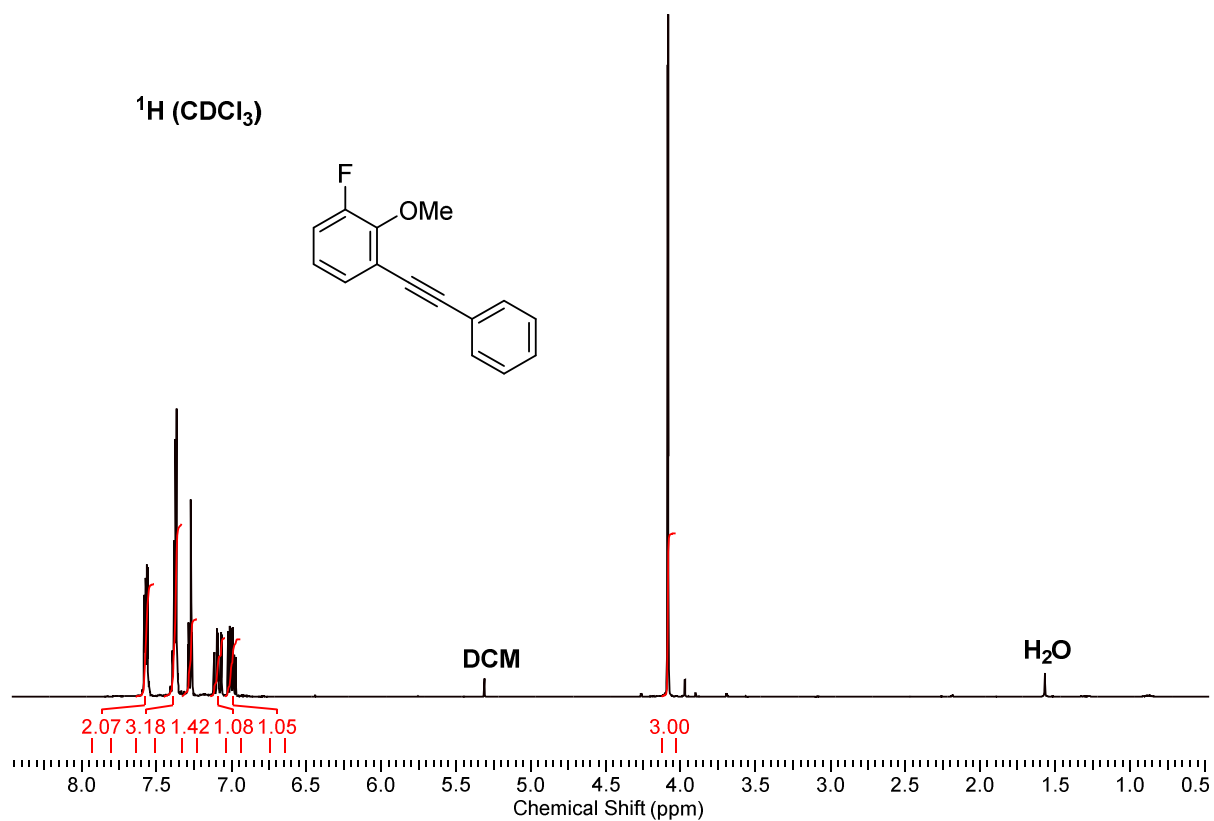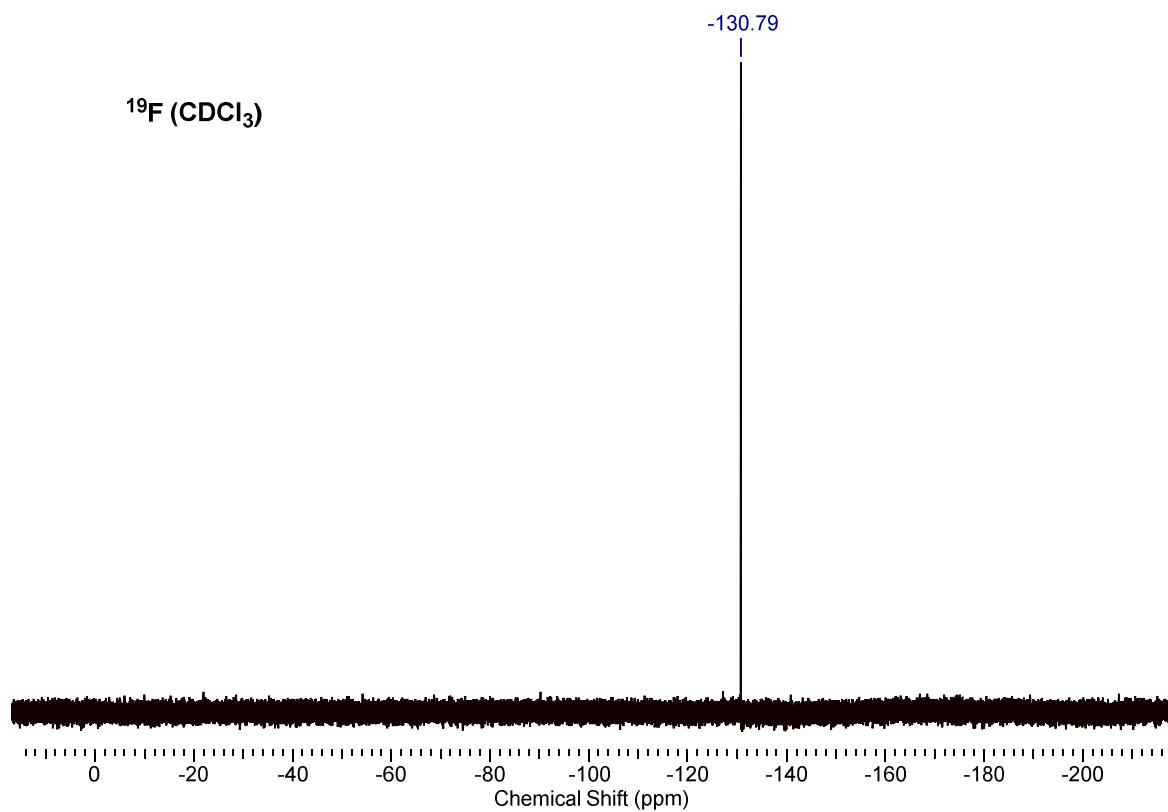

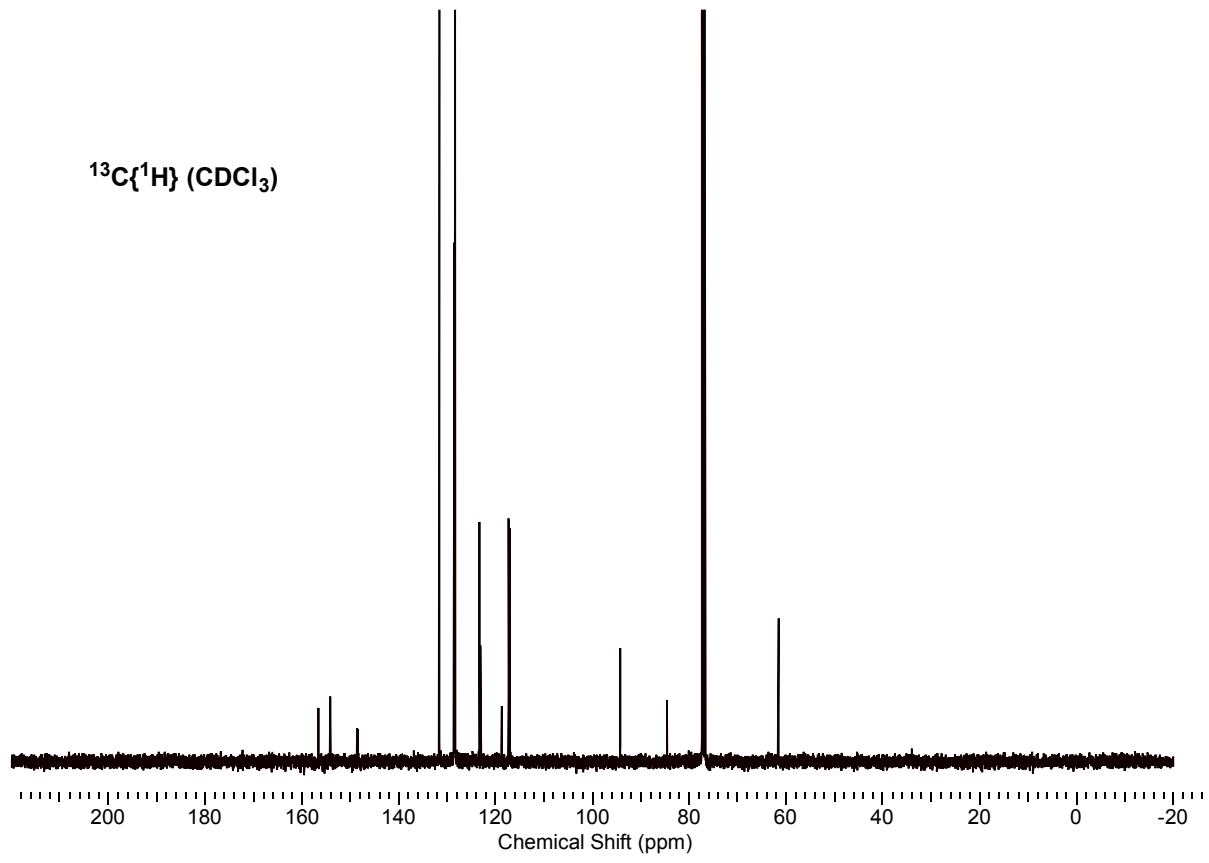



1-methoxy-3-methyl-2-(phenylethynyl)benzene (3e)

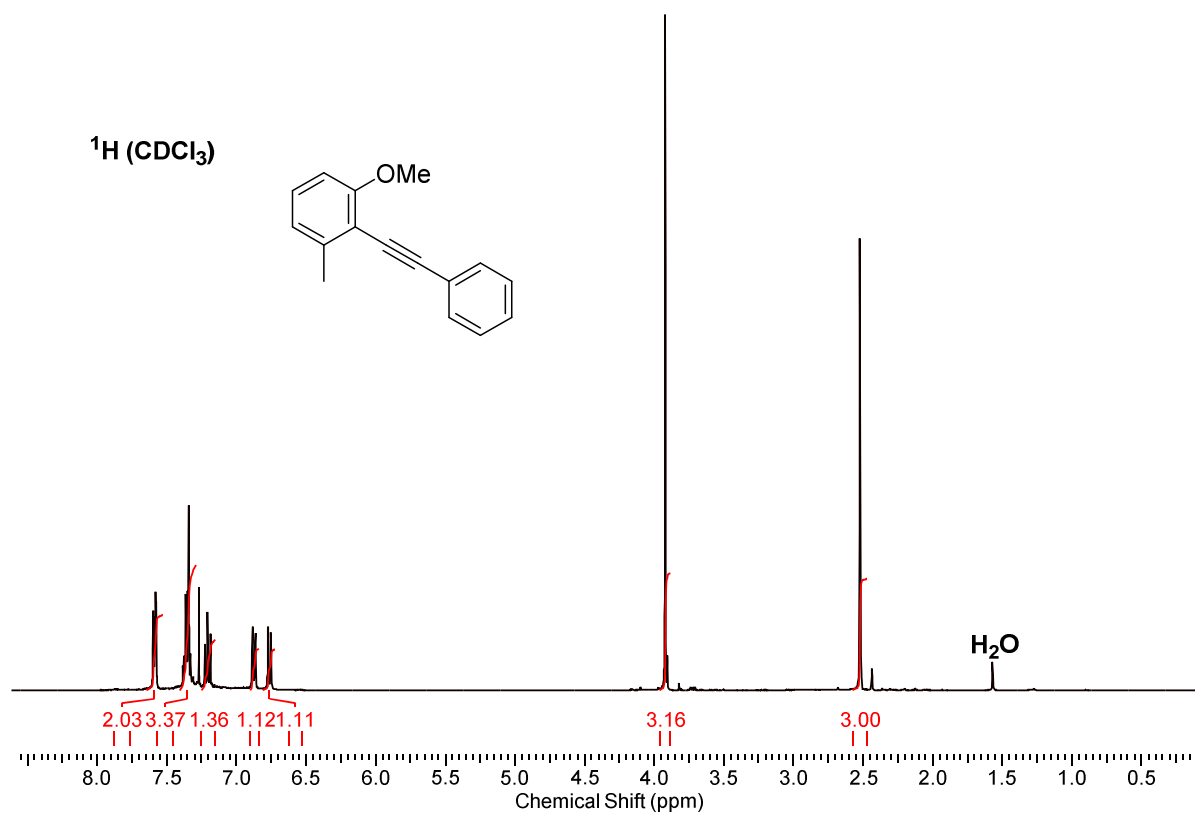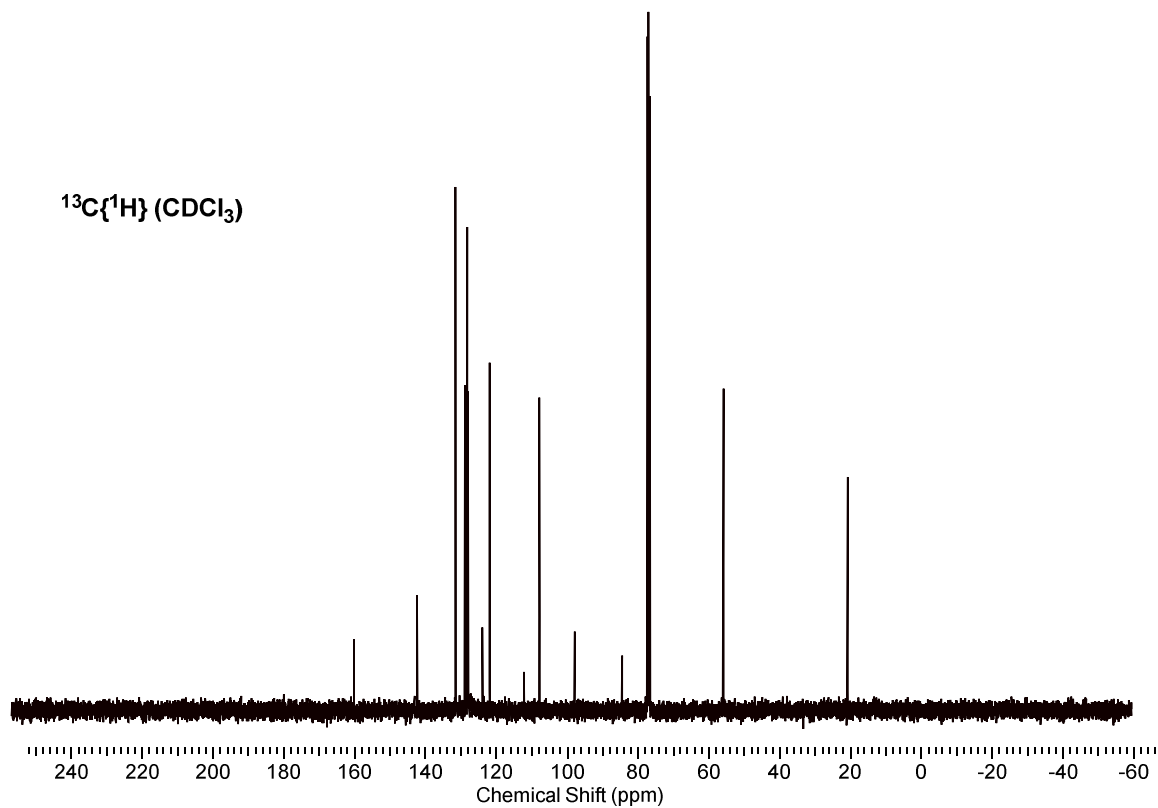

1-methoxy-2-(3-phenylprop-1-yn-1-yl)benzene (3f)

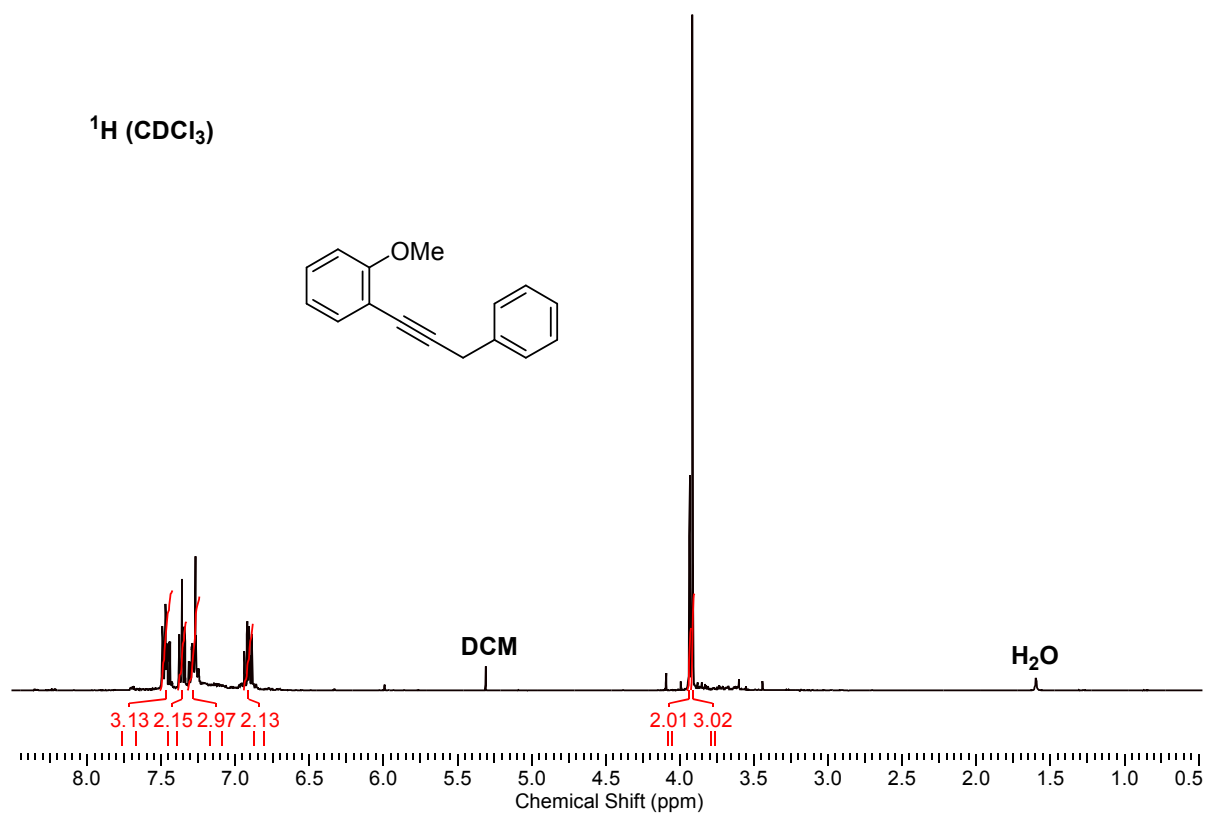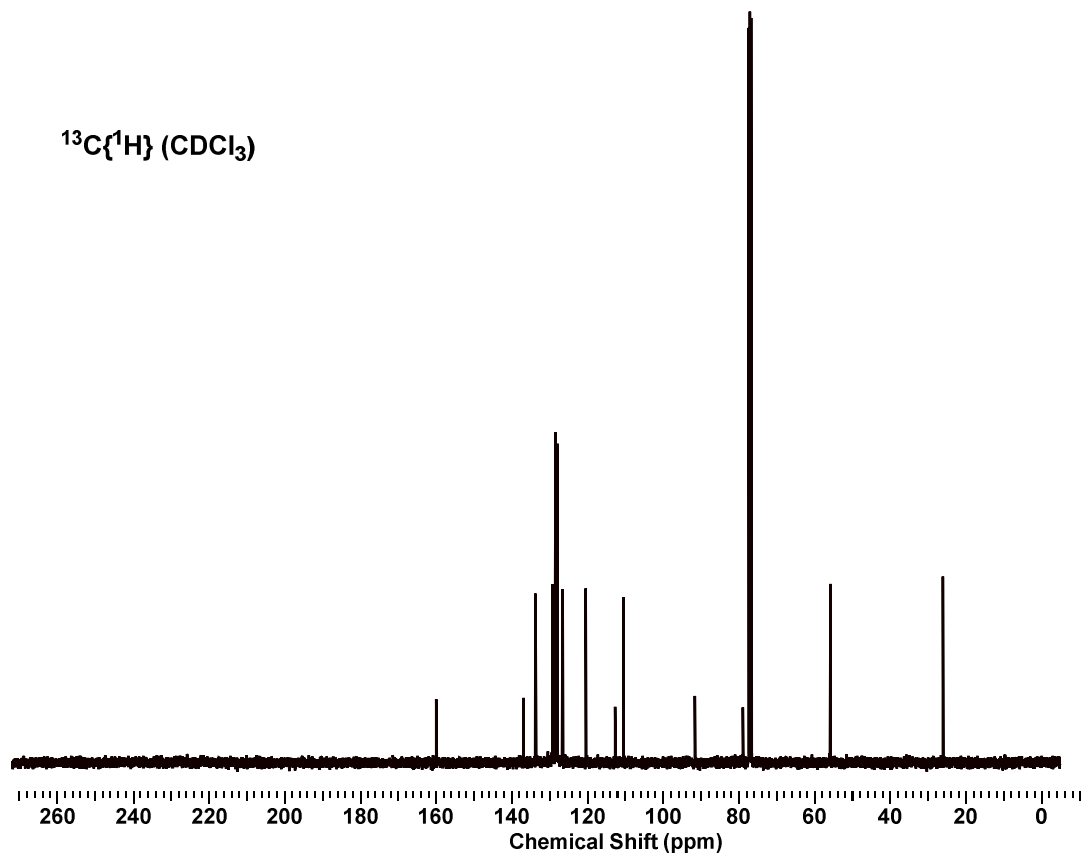

1-methoxy-2-(prop-1-yn-1-yl)benzene (3g)

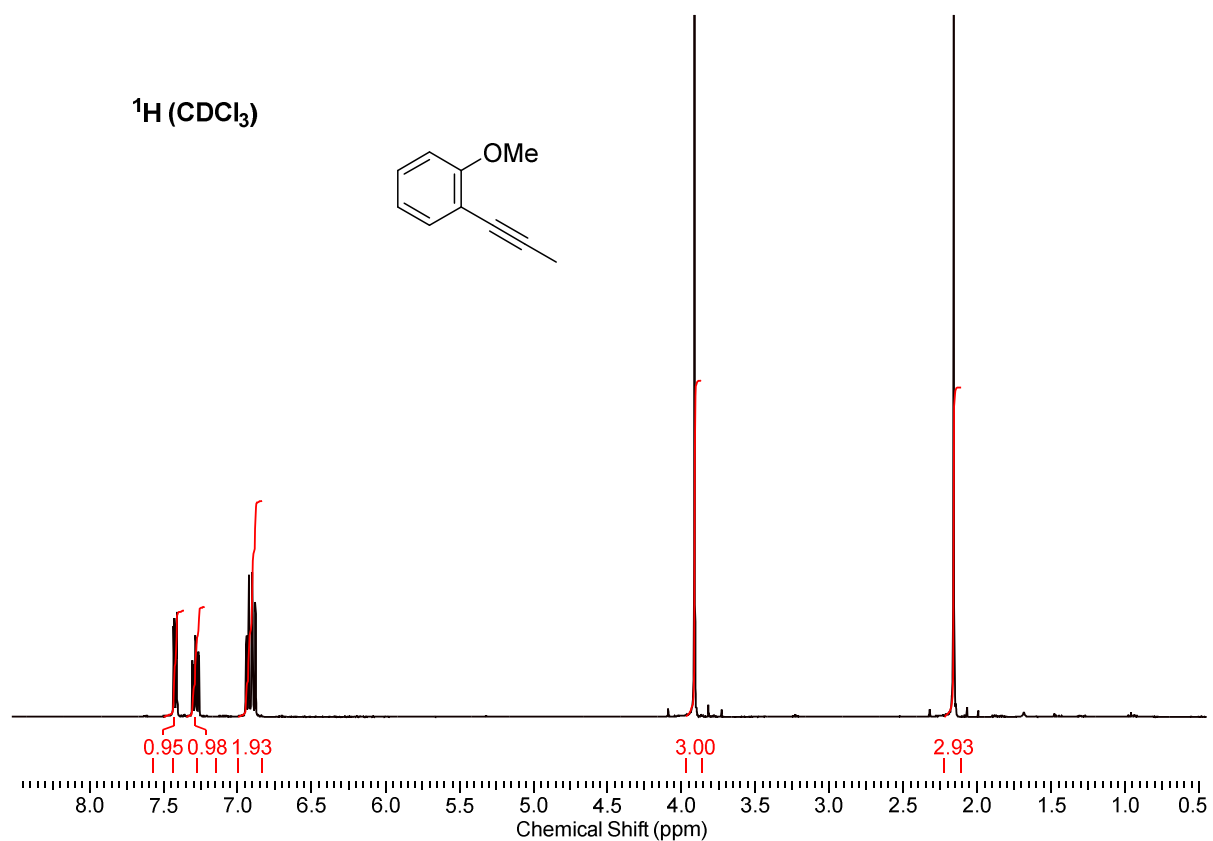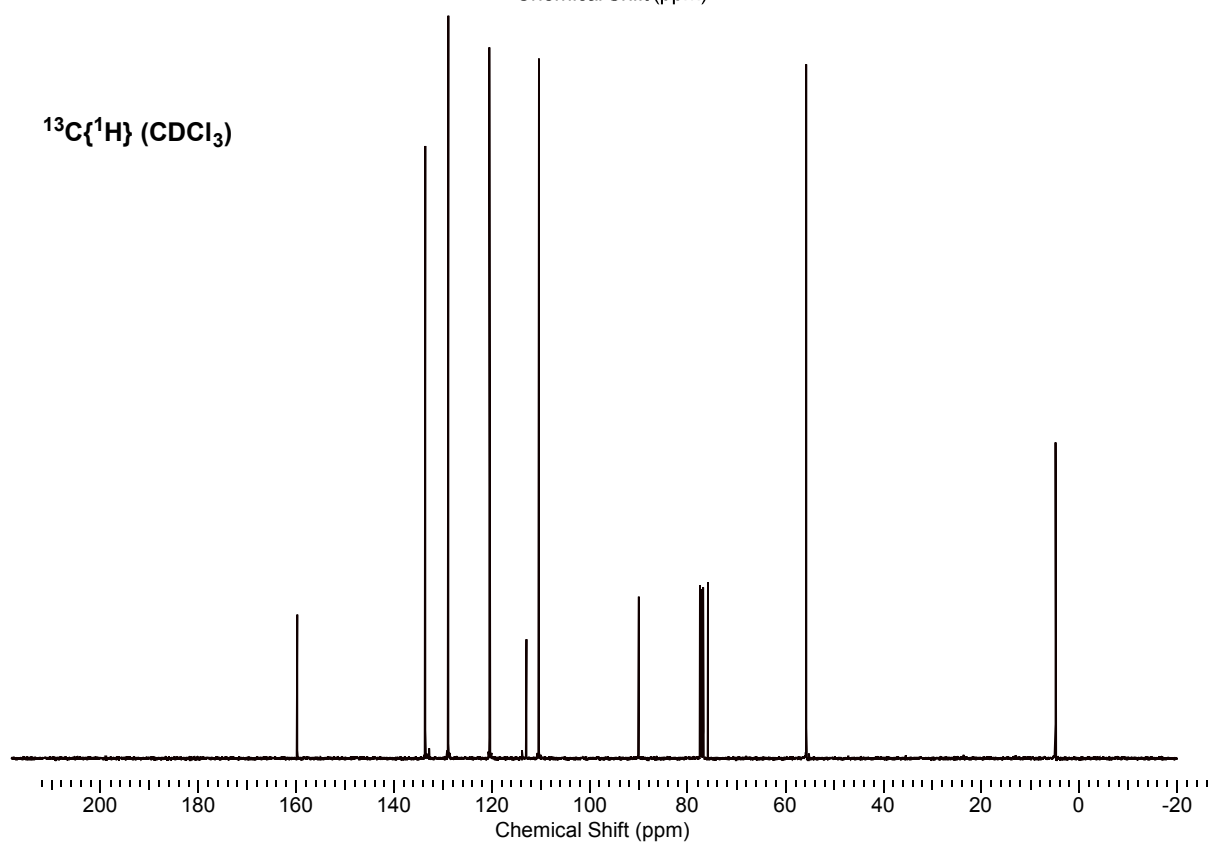

Ethyl 4-((2-methoxyphenyl)ethynyl)benzoate (3h)

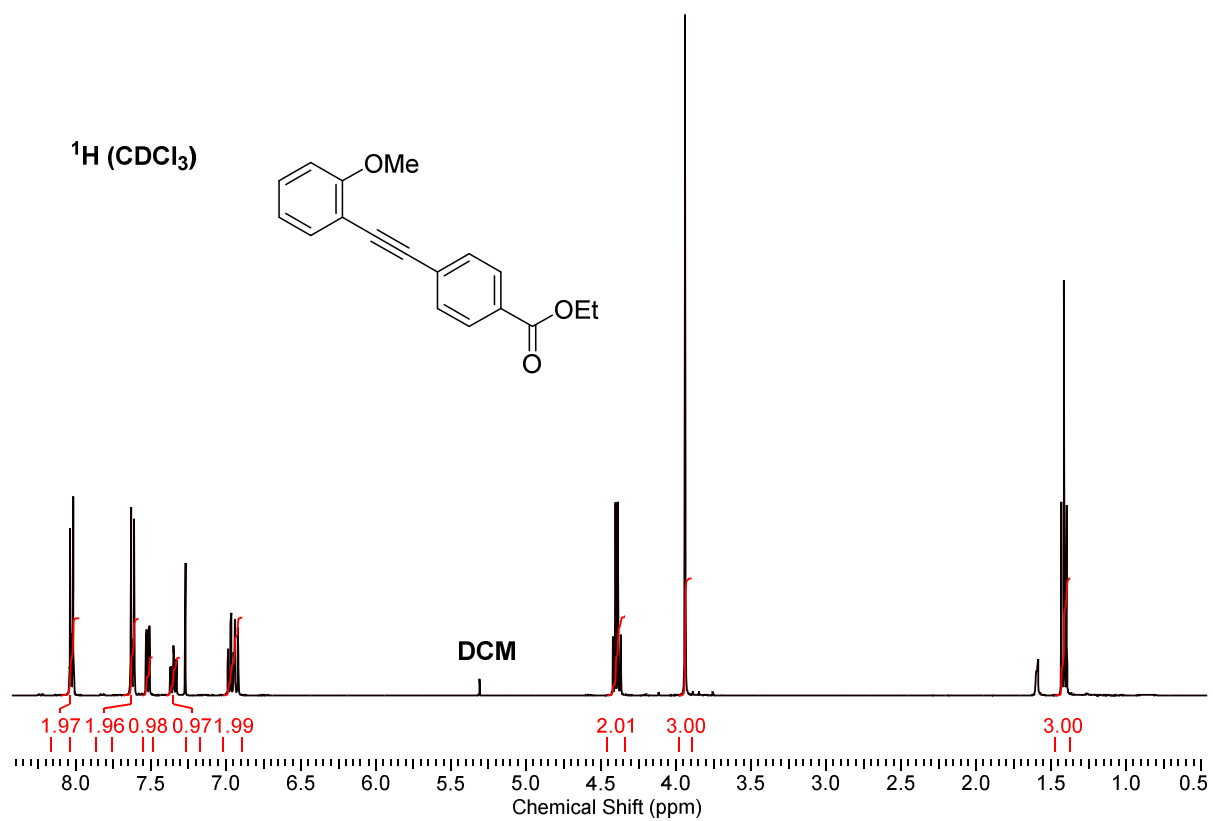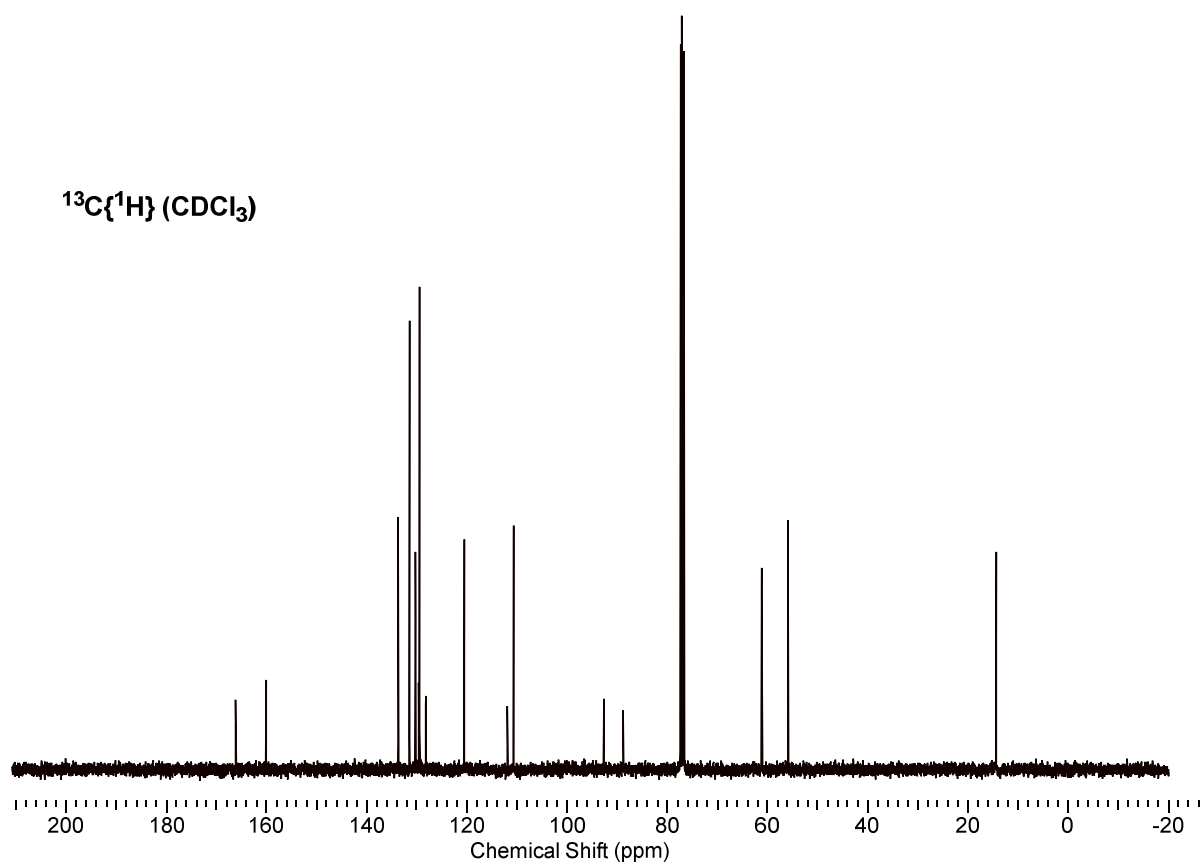

2-methoxy-4-nitro-1-(phenylethynyl)benzene (3i)

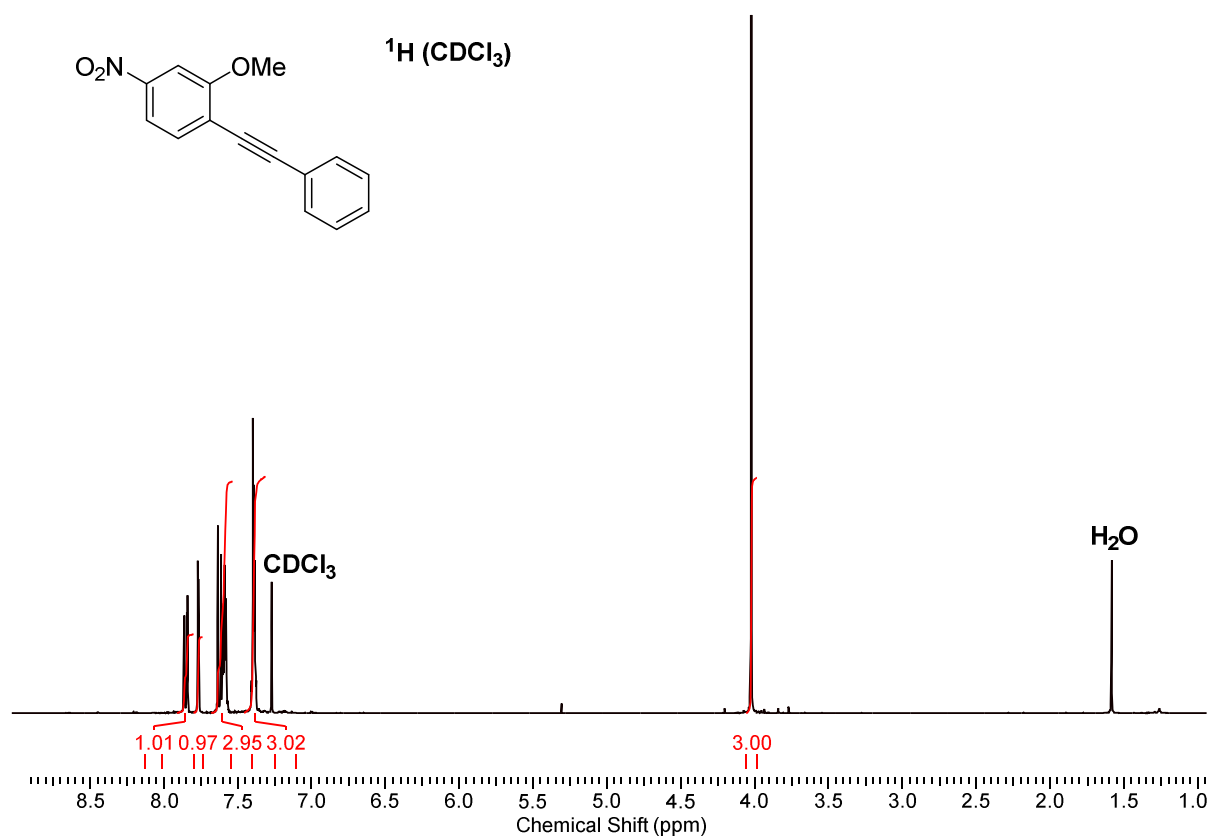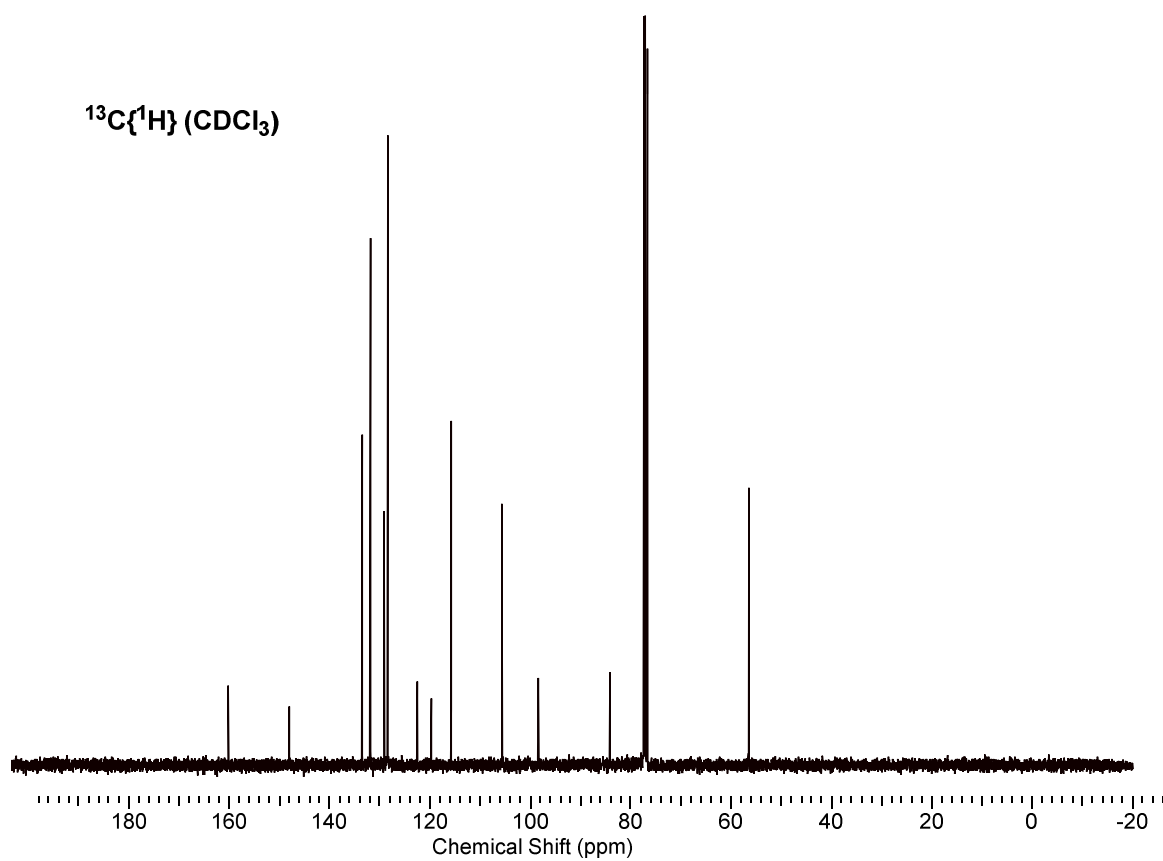

1-((2-methoxyphenyl)ethynyl)naphthalene (3j)

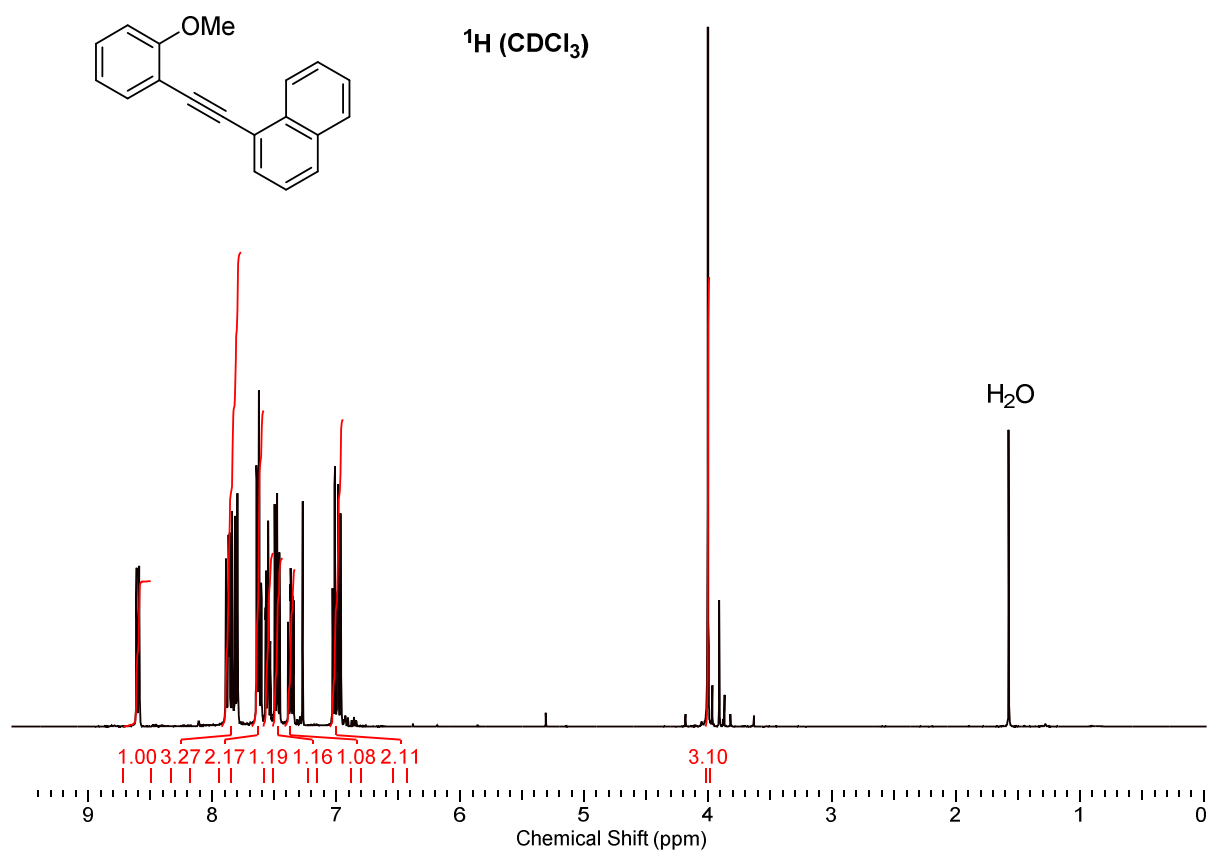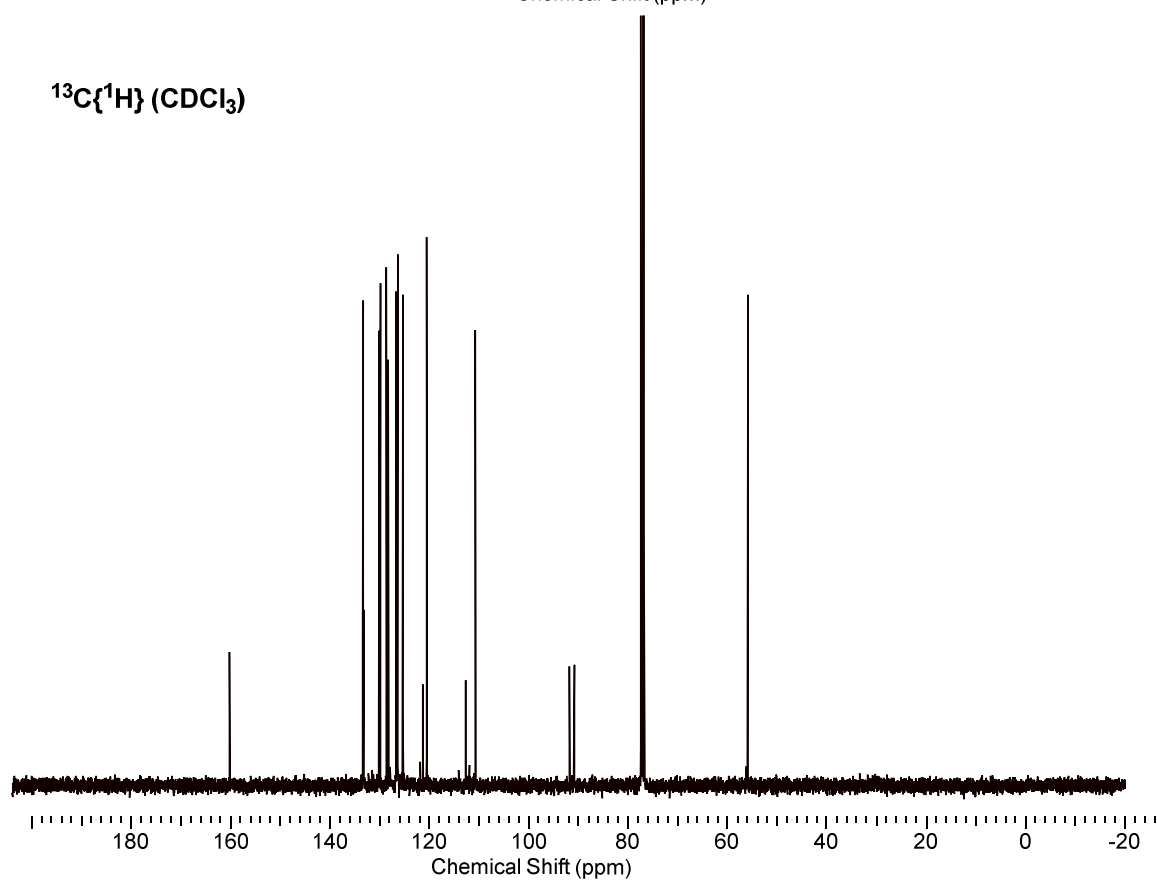

Methyl(2-(phenylethynyl)phenyl)sulfane (9a)

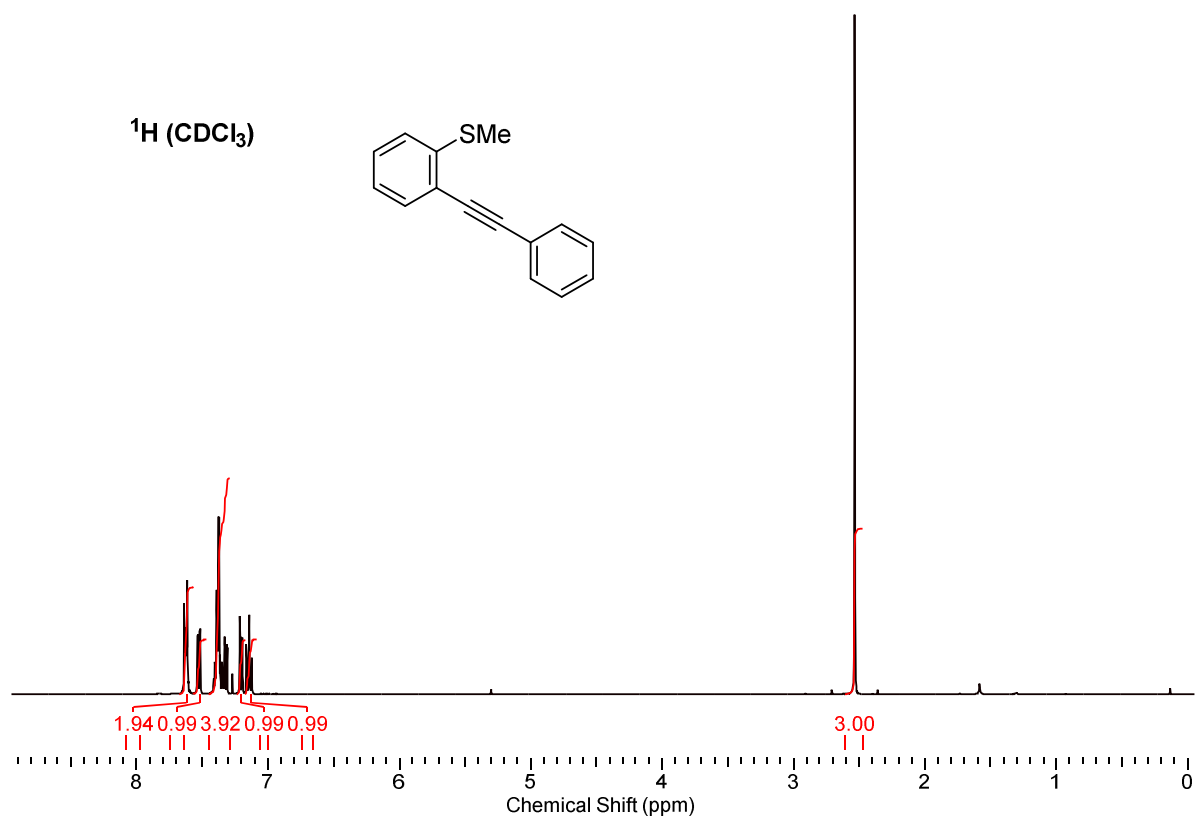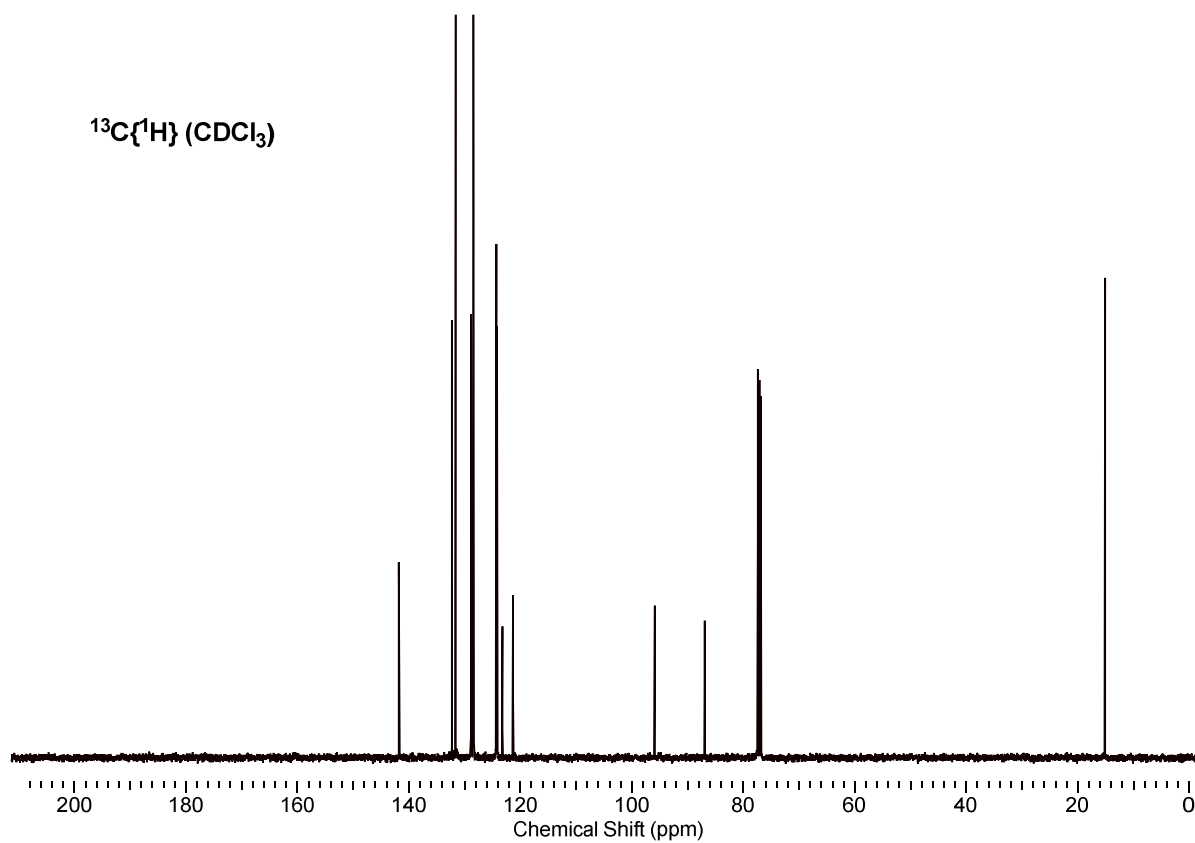

**Methyl(2-(naphthalen-1-ylethynyl)phenyl)sulfane (9b)**

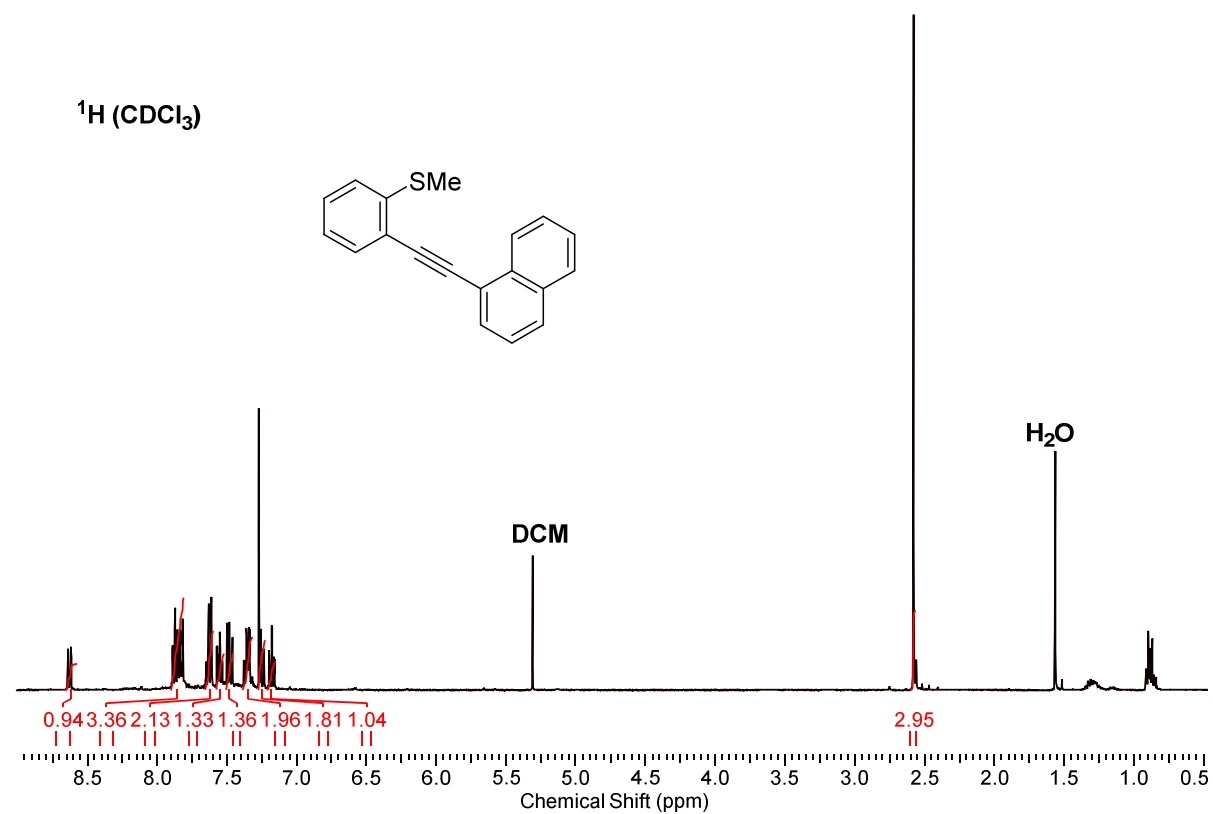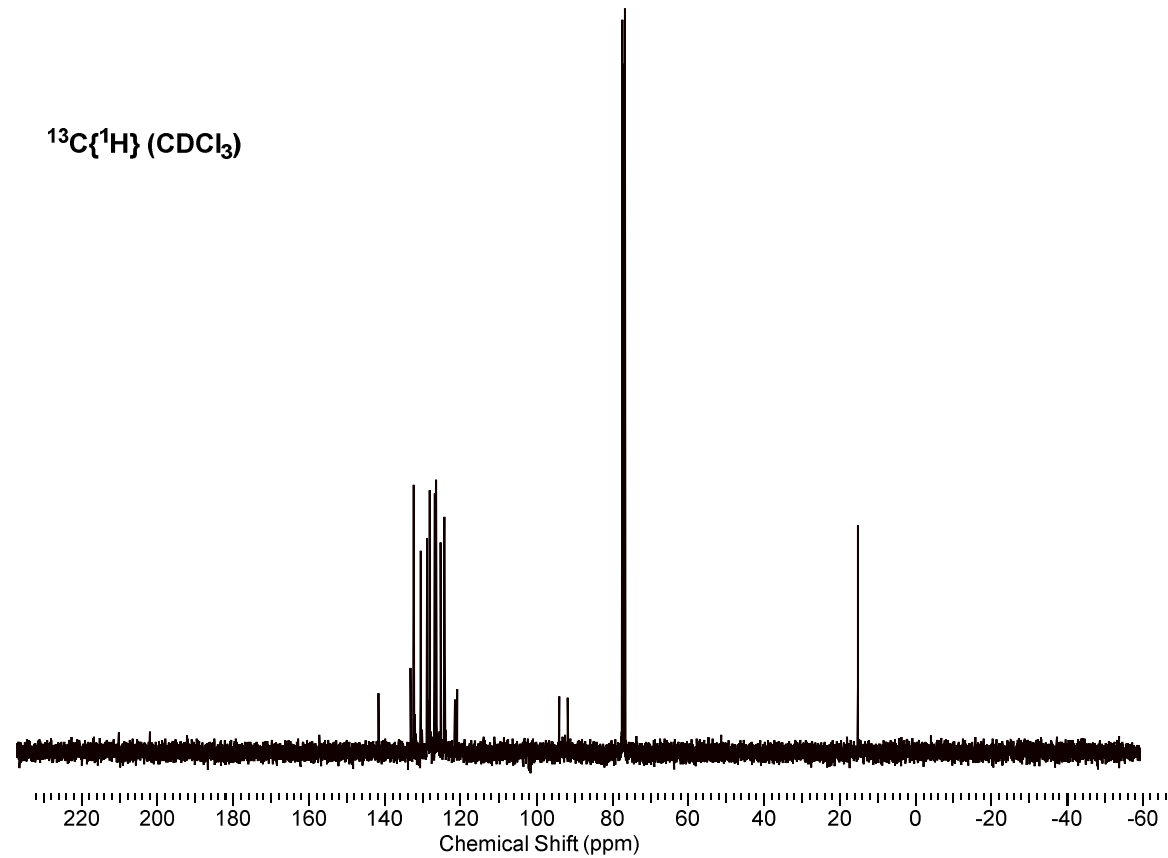



(2-(mesitylethynyl)phenyl)(methyl)sulfane (9c)

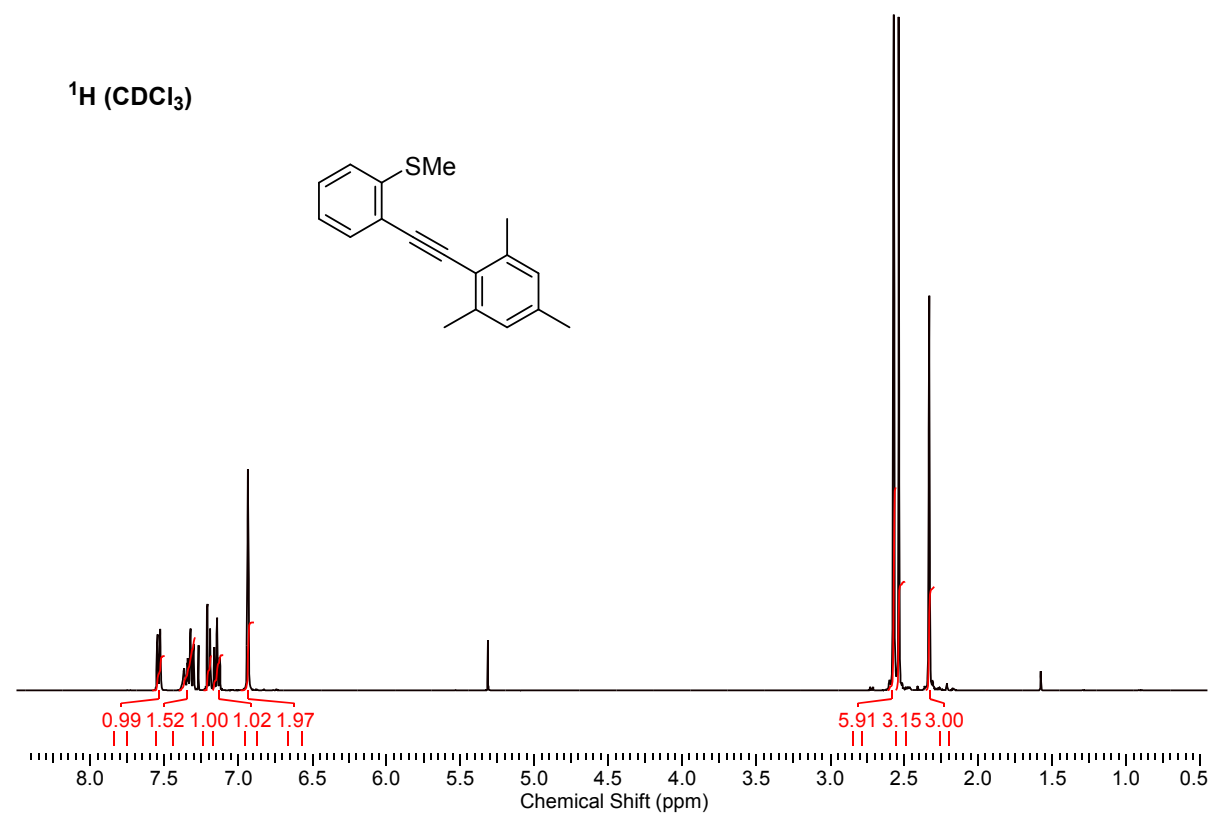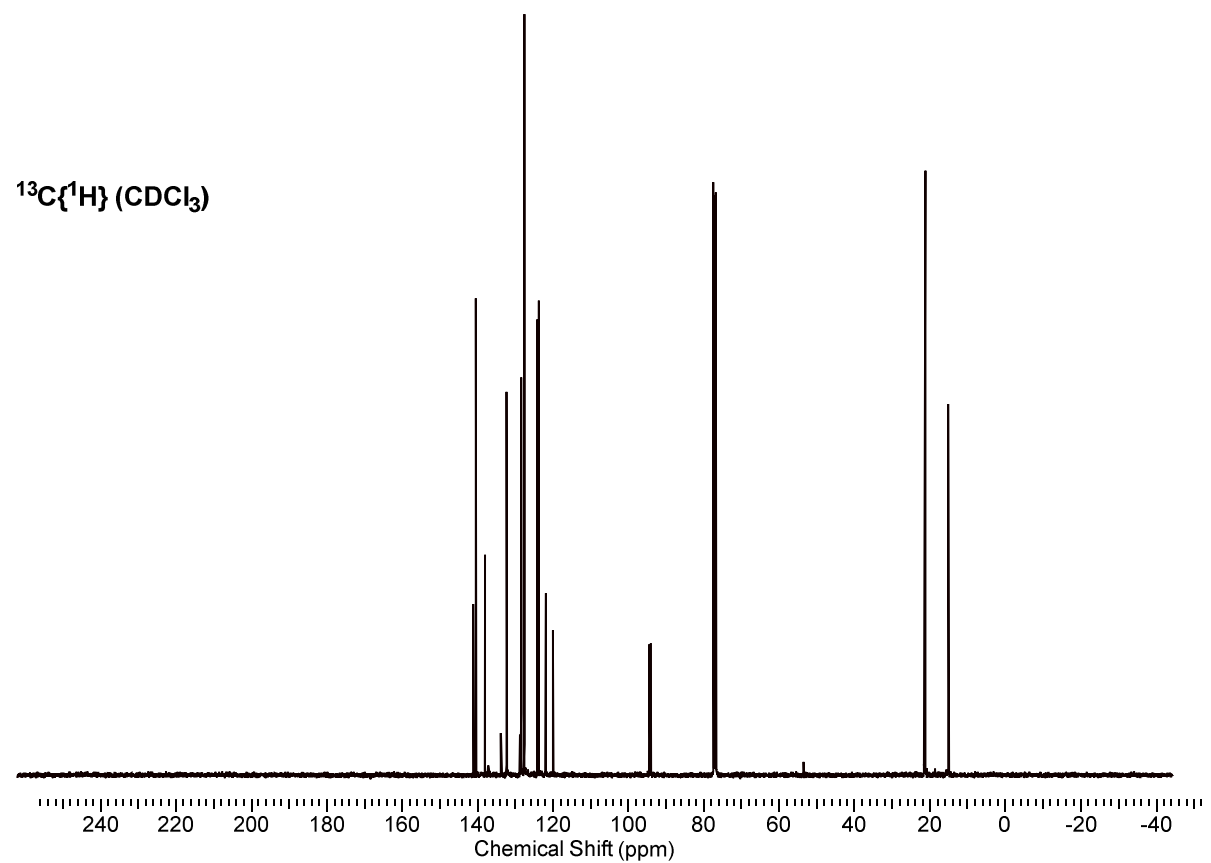

3-((2-(methylthio)phenyl)ethynyl)thiophene (9d)

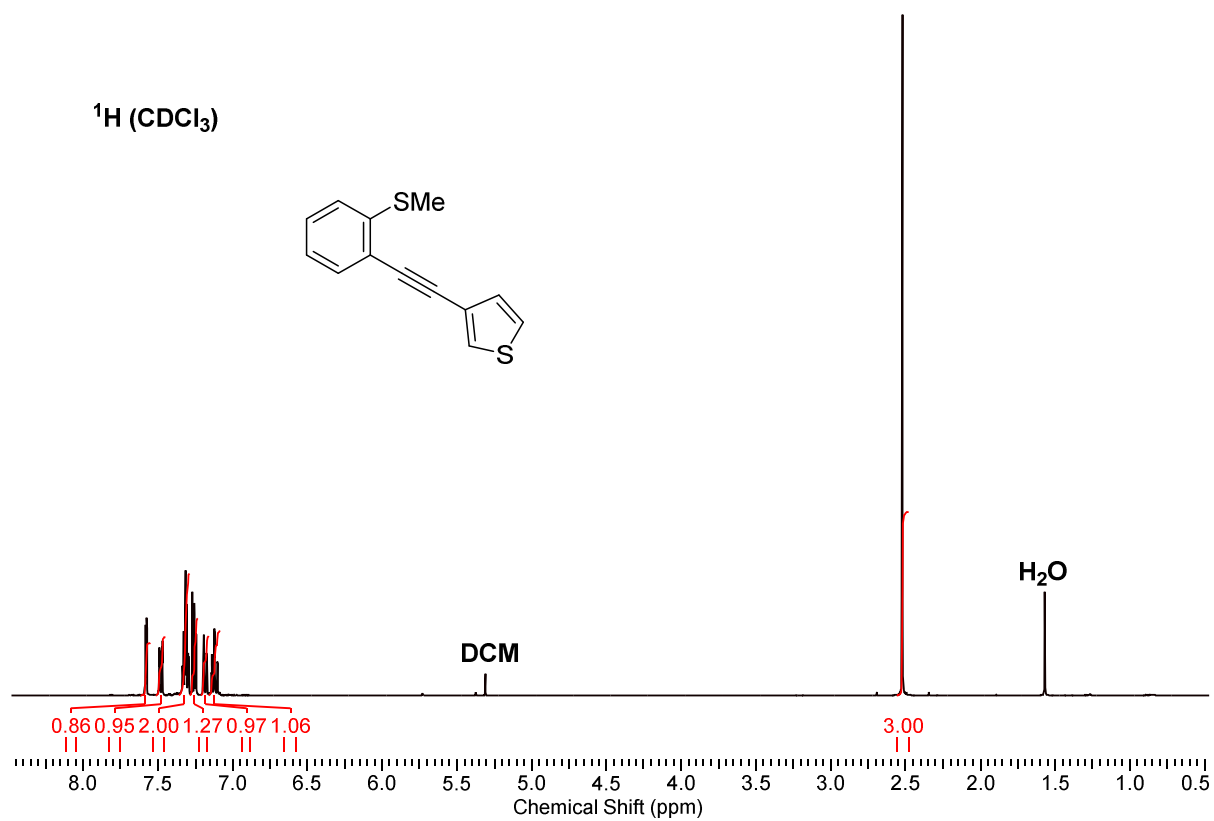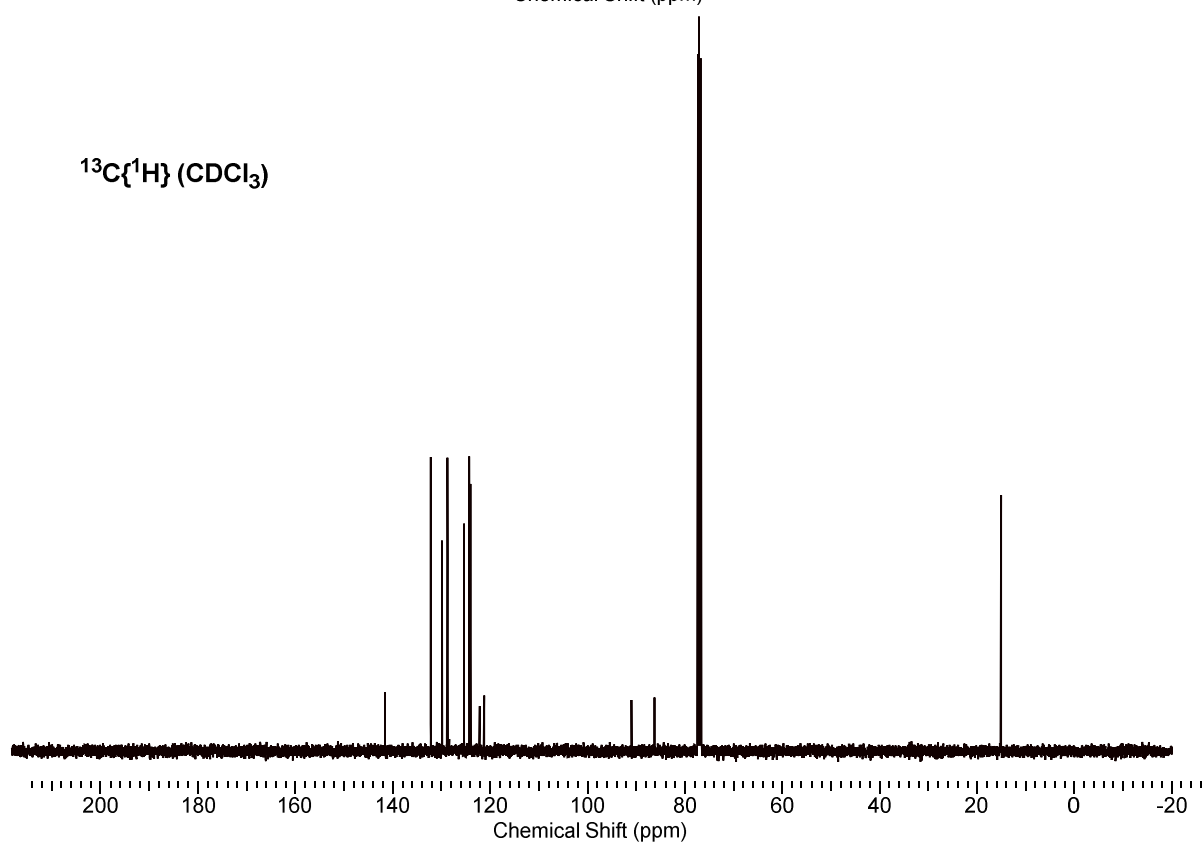

4,4,5,5-tetramethyl-2-(2-phenylbenzofuran-3-yl)-1,3,2-dioxaborolane (4a)

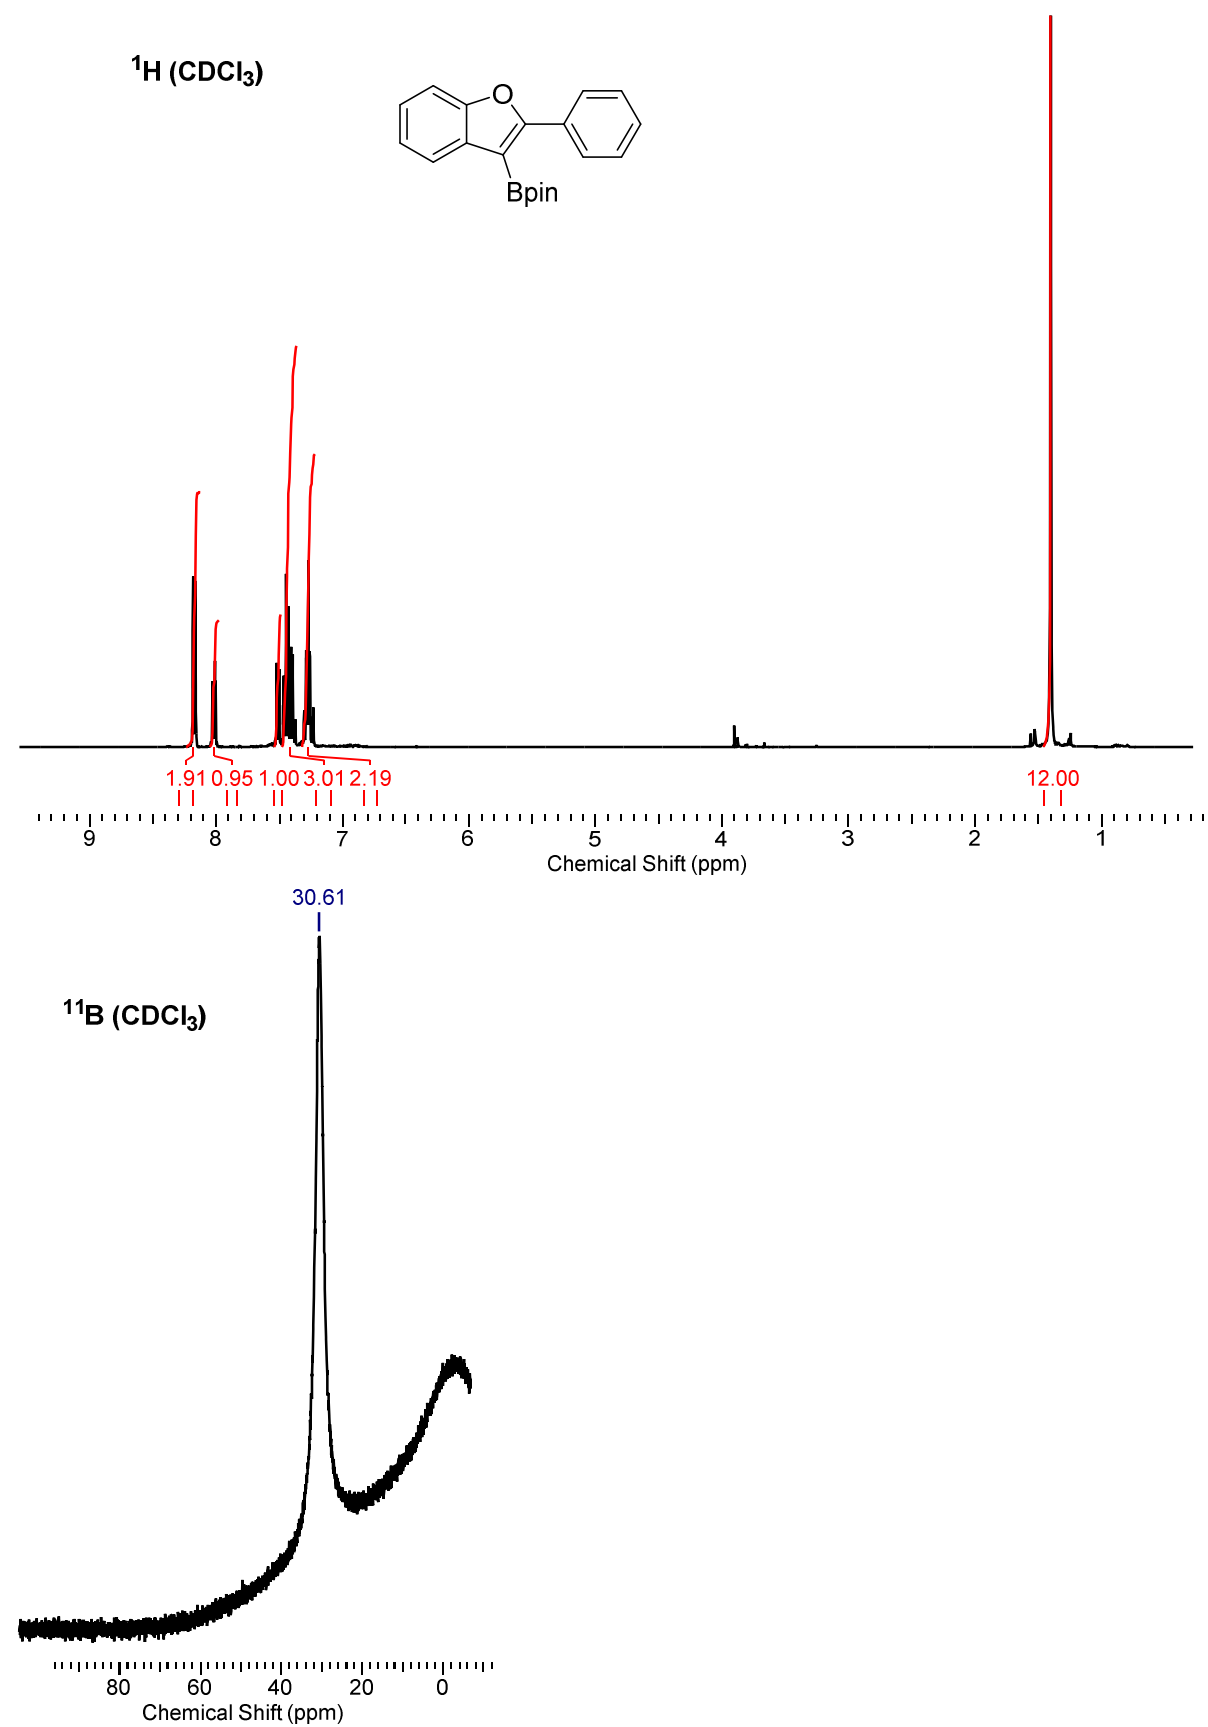

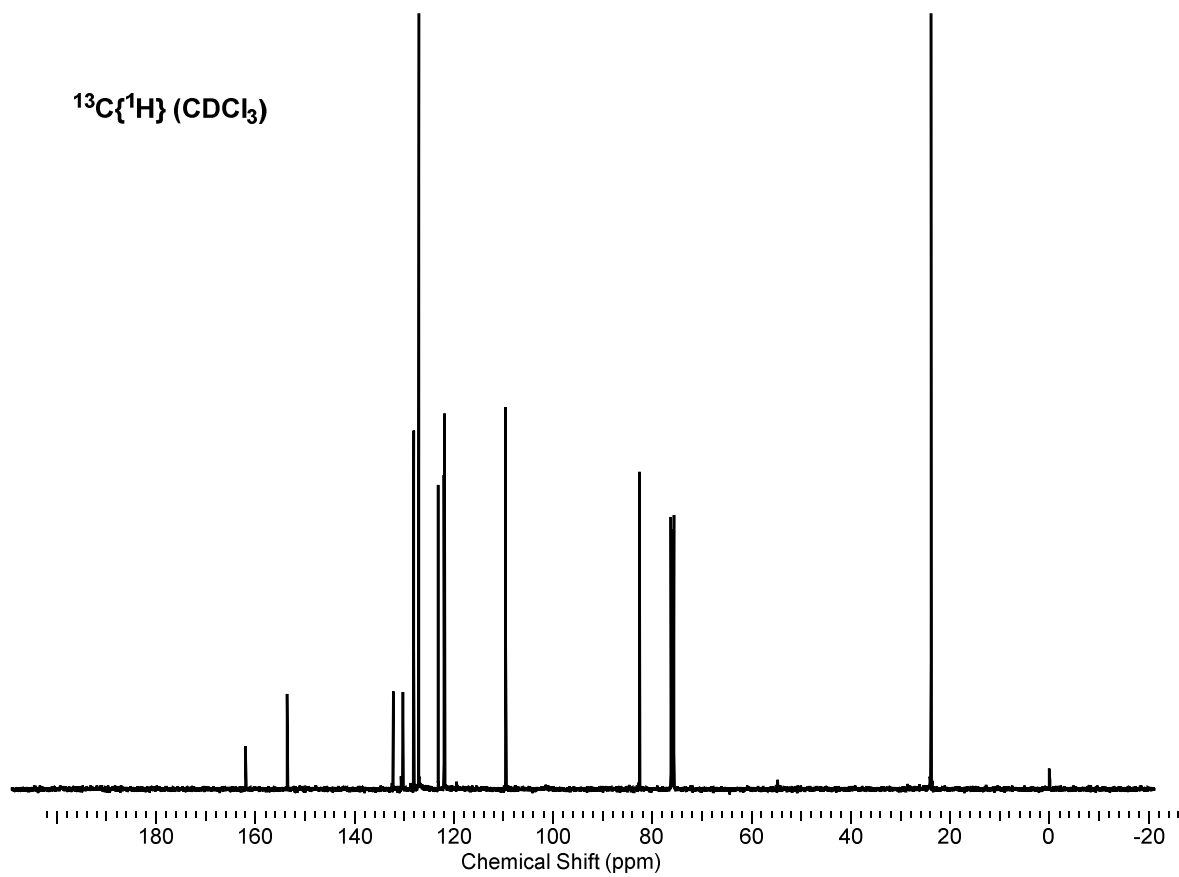

4,4,5,5-tetramethyl-2-(5-methyl-2-phenylbenzofuran-3-yl)-1,3,2-dioxaborolane (**4b**)

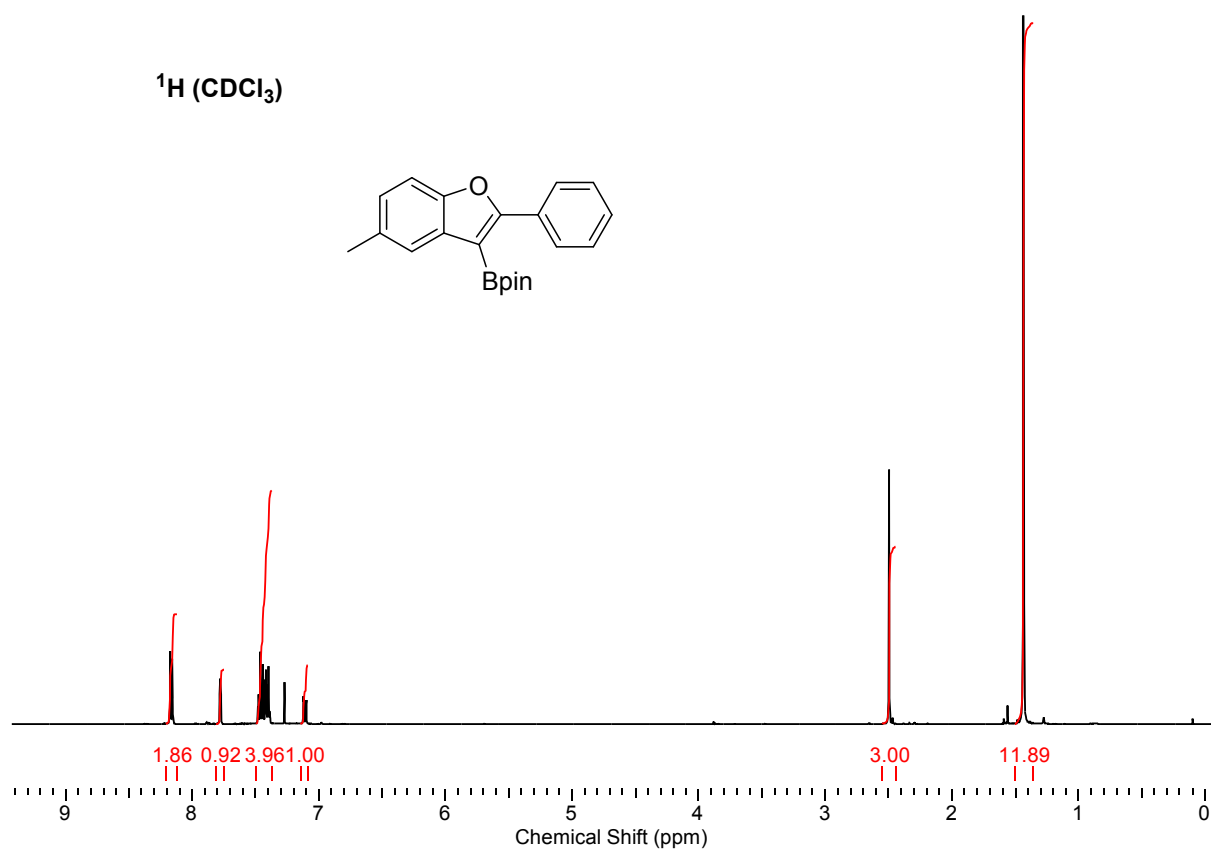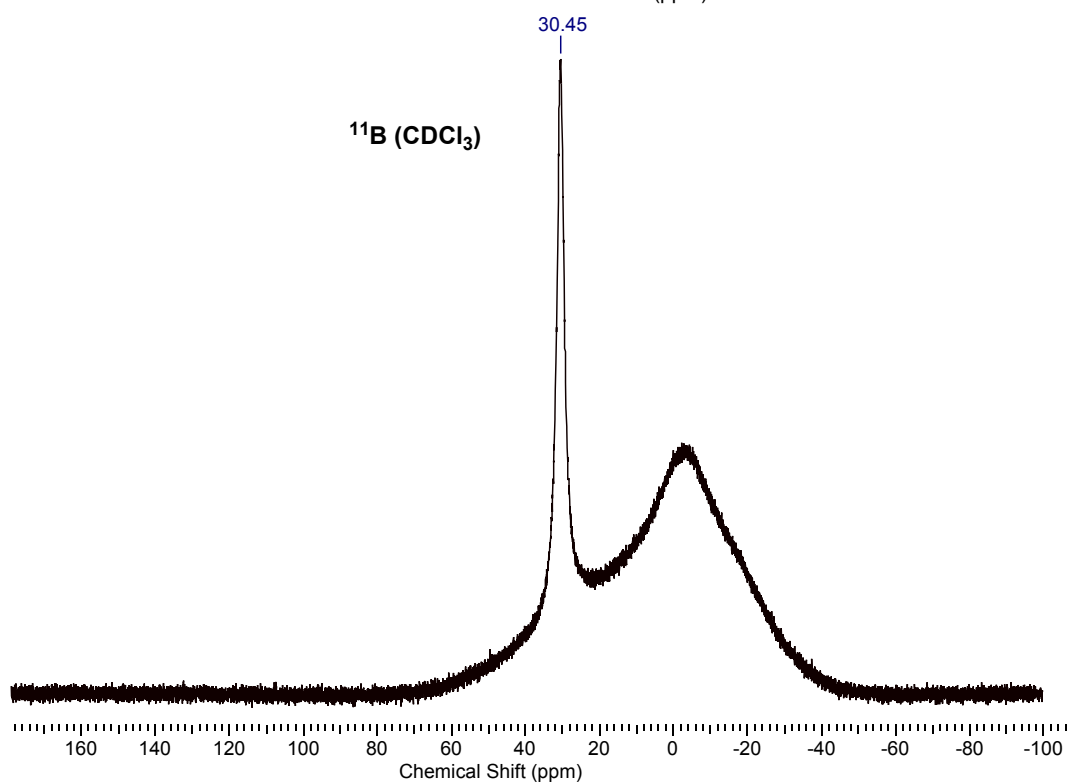

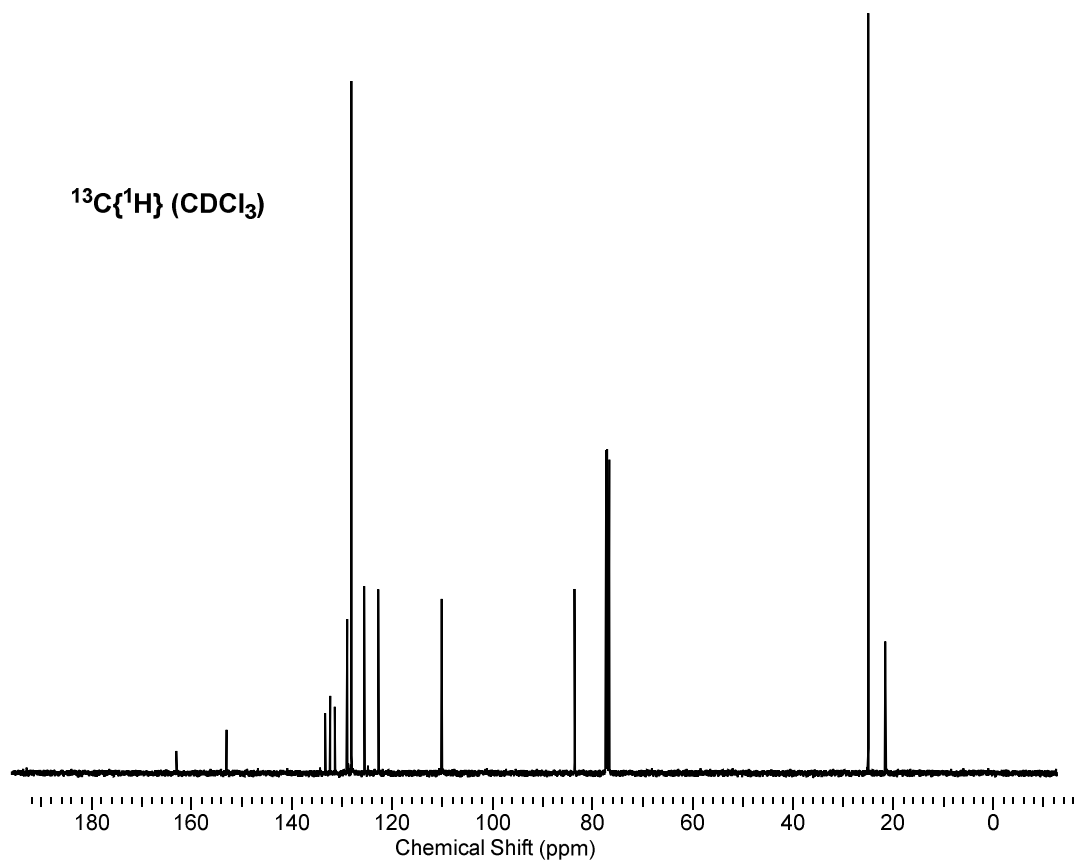

2-(5-chloro-2-phenylbenzofuran-3-yl)-4,4,5,5-tetramethyl-1,3,2-dioxaborolane (4c)

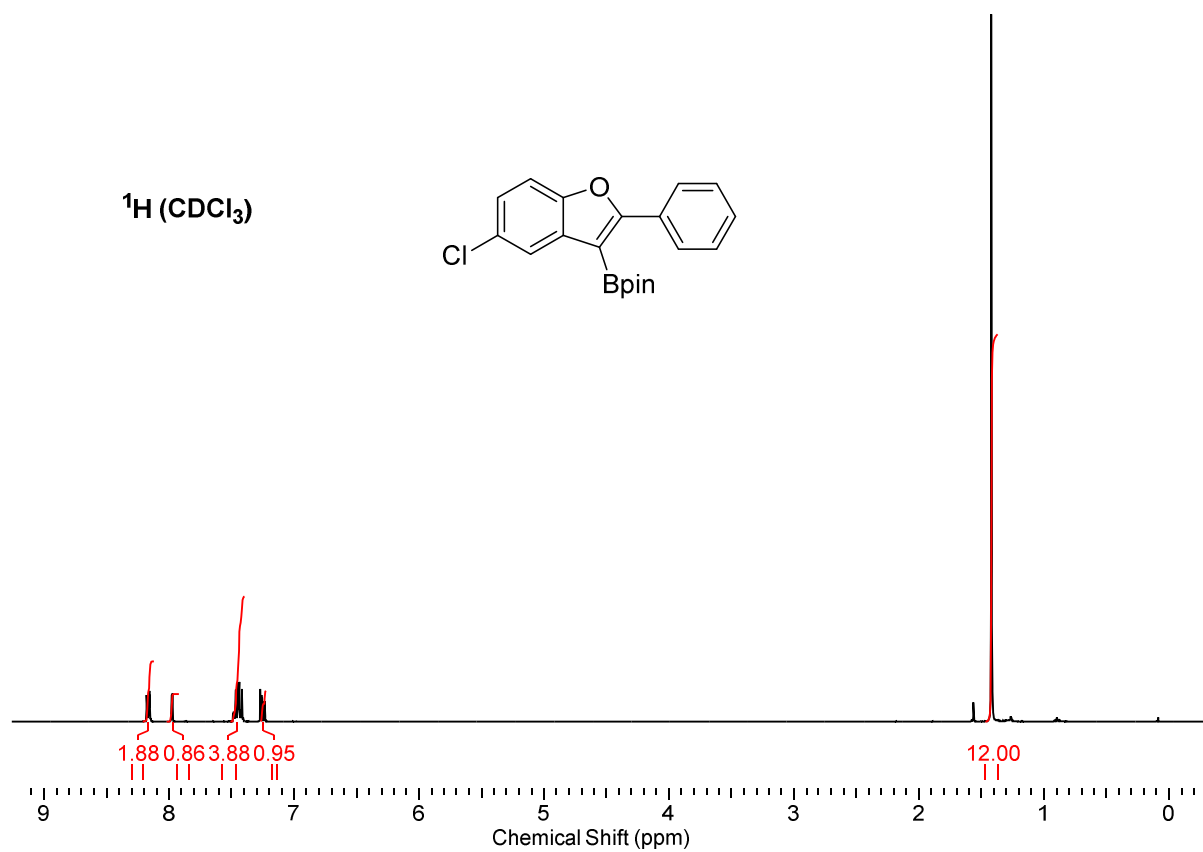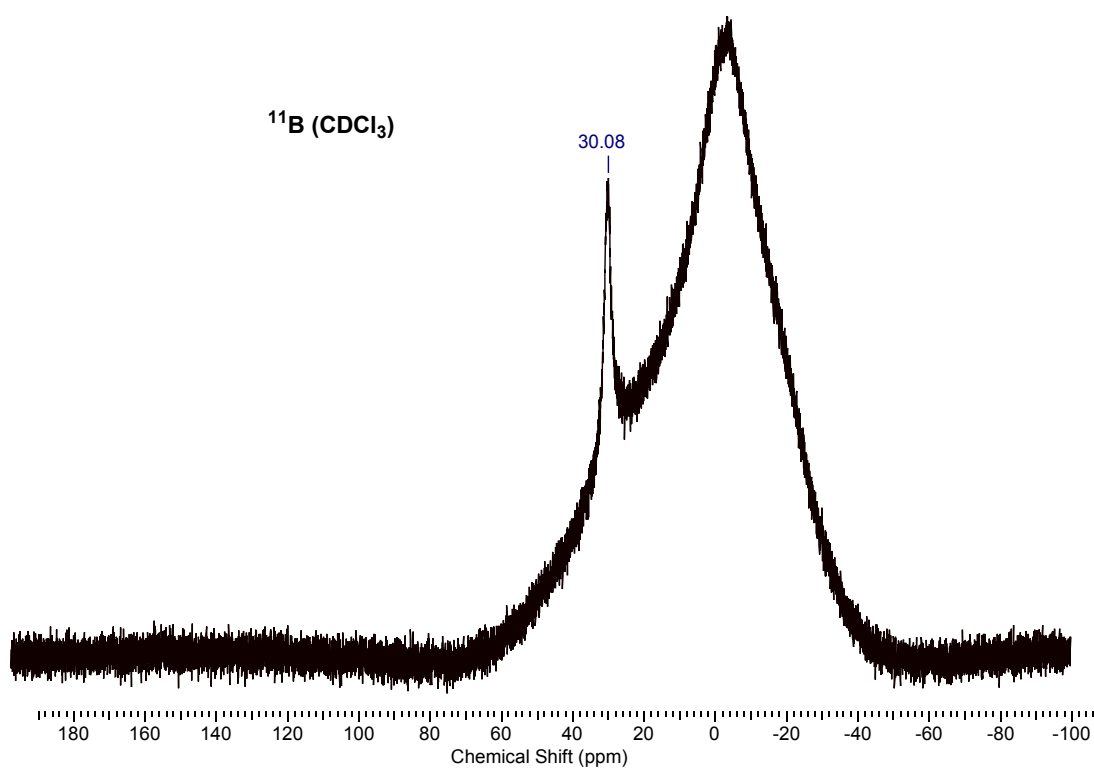

$^{13}\text{C}\{^1\text{H}\}$  ( $\text{CDCl}_3$ )

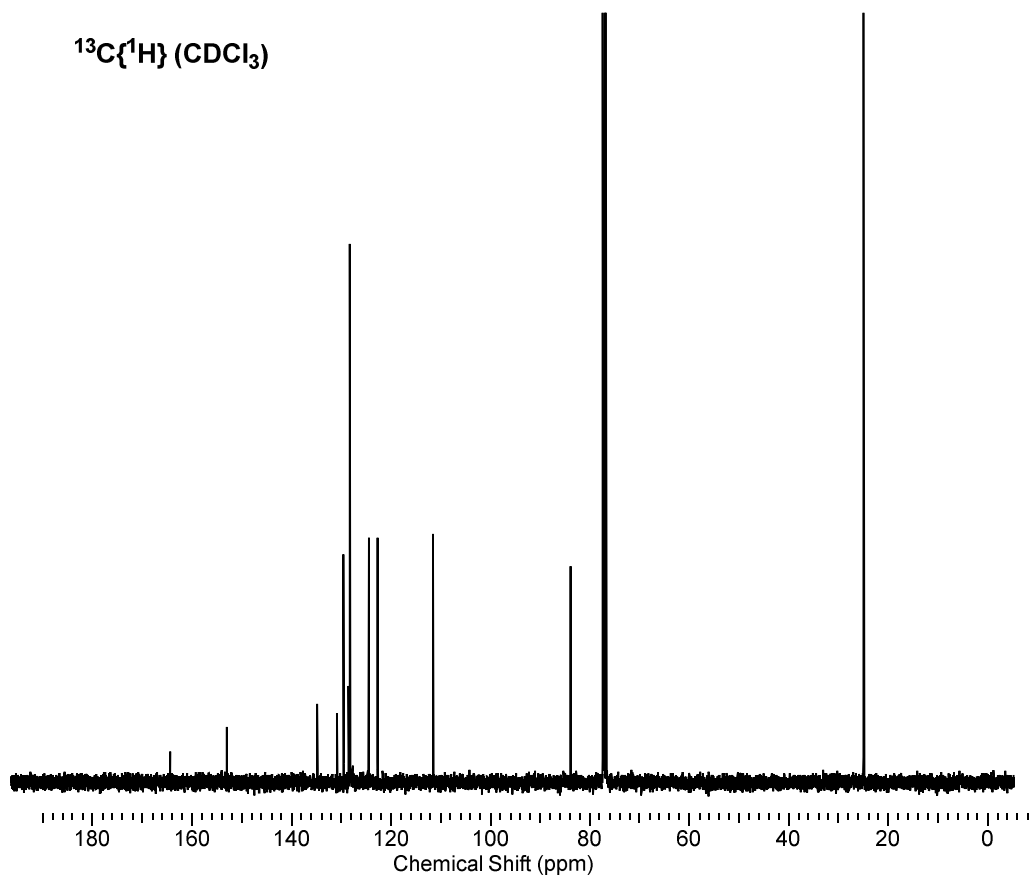



2-(7-fluoro-2-phenylbenzofuran-3-yl)-4,4,5,5-tetramethyl-1,3,2-dioxaborolane (4d)

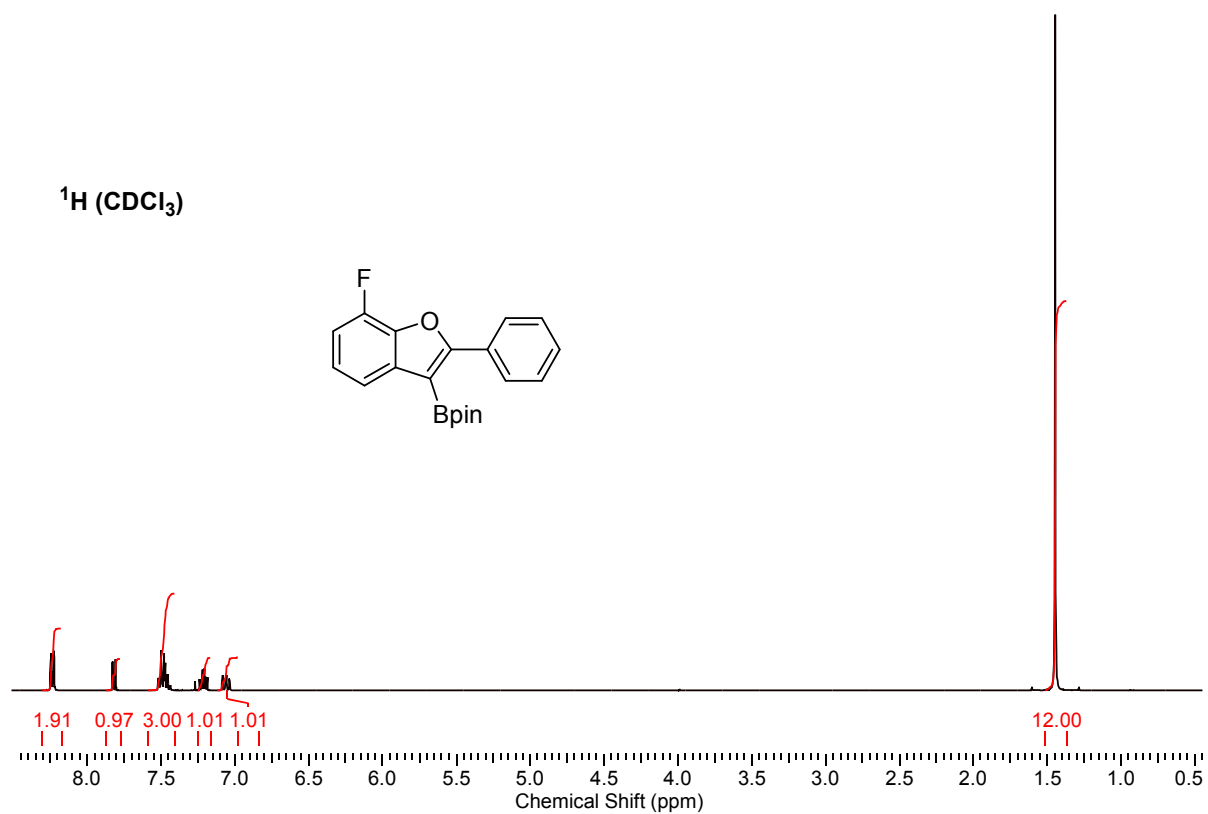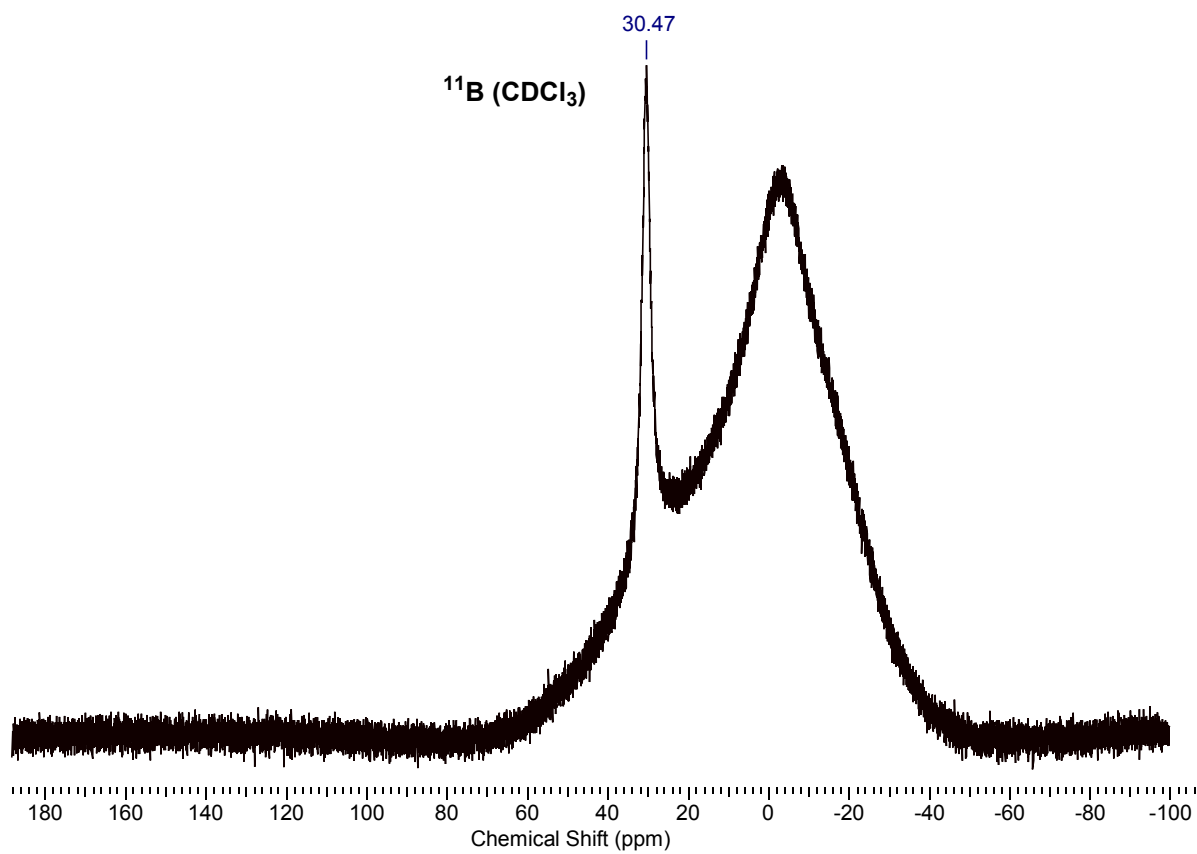

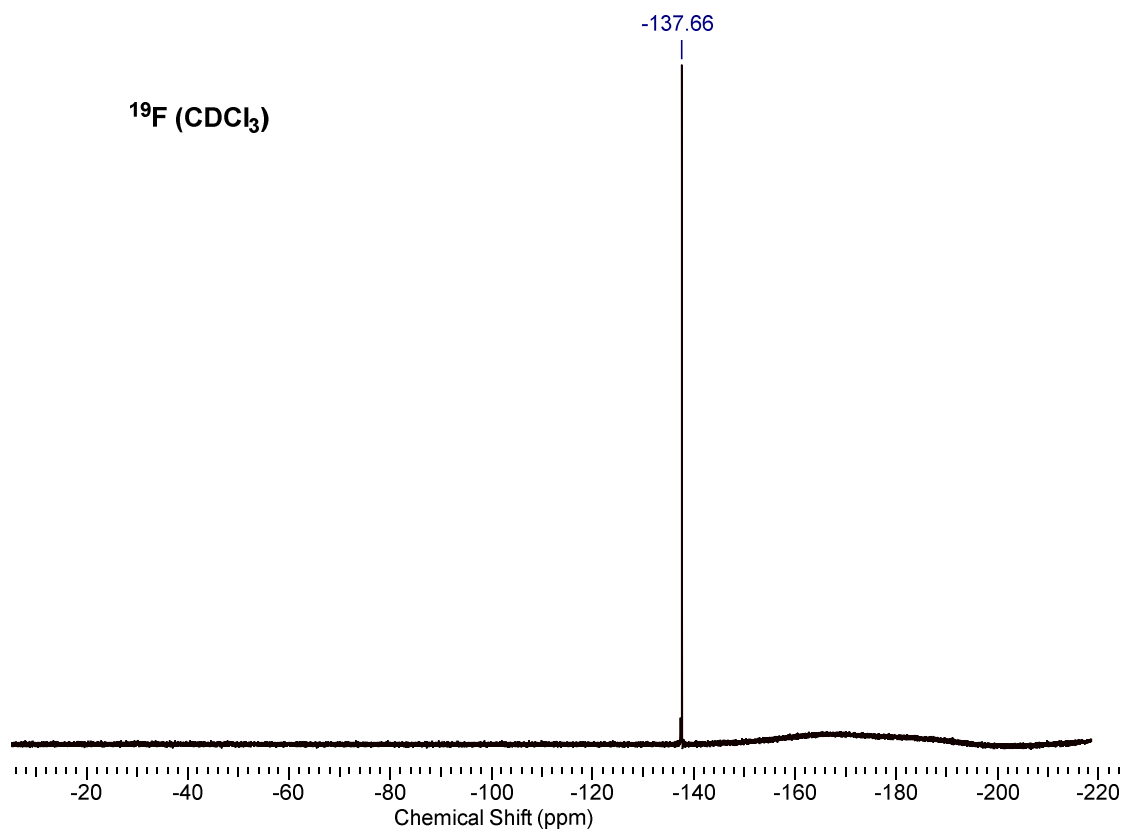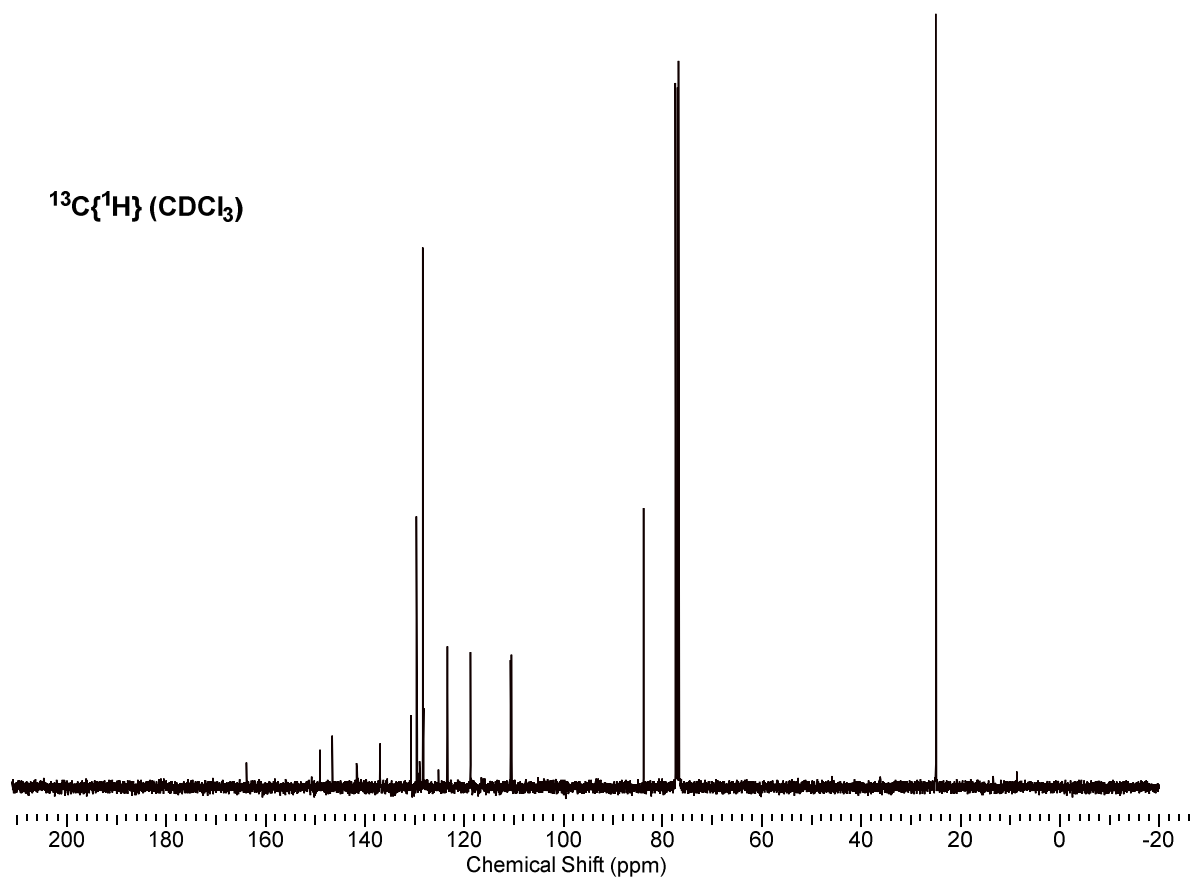

**4,4,5,5-tetramethyl-2-(4-methyl-2-phenylbenzofuran-3-yl)-1,3,2-dioxaborolane (4e)**

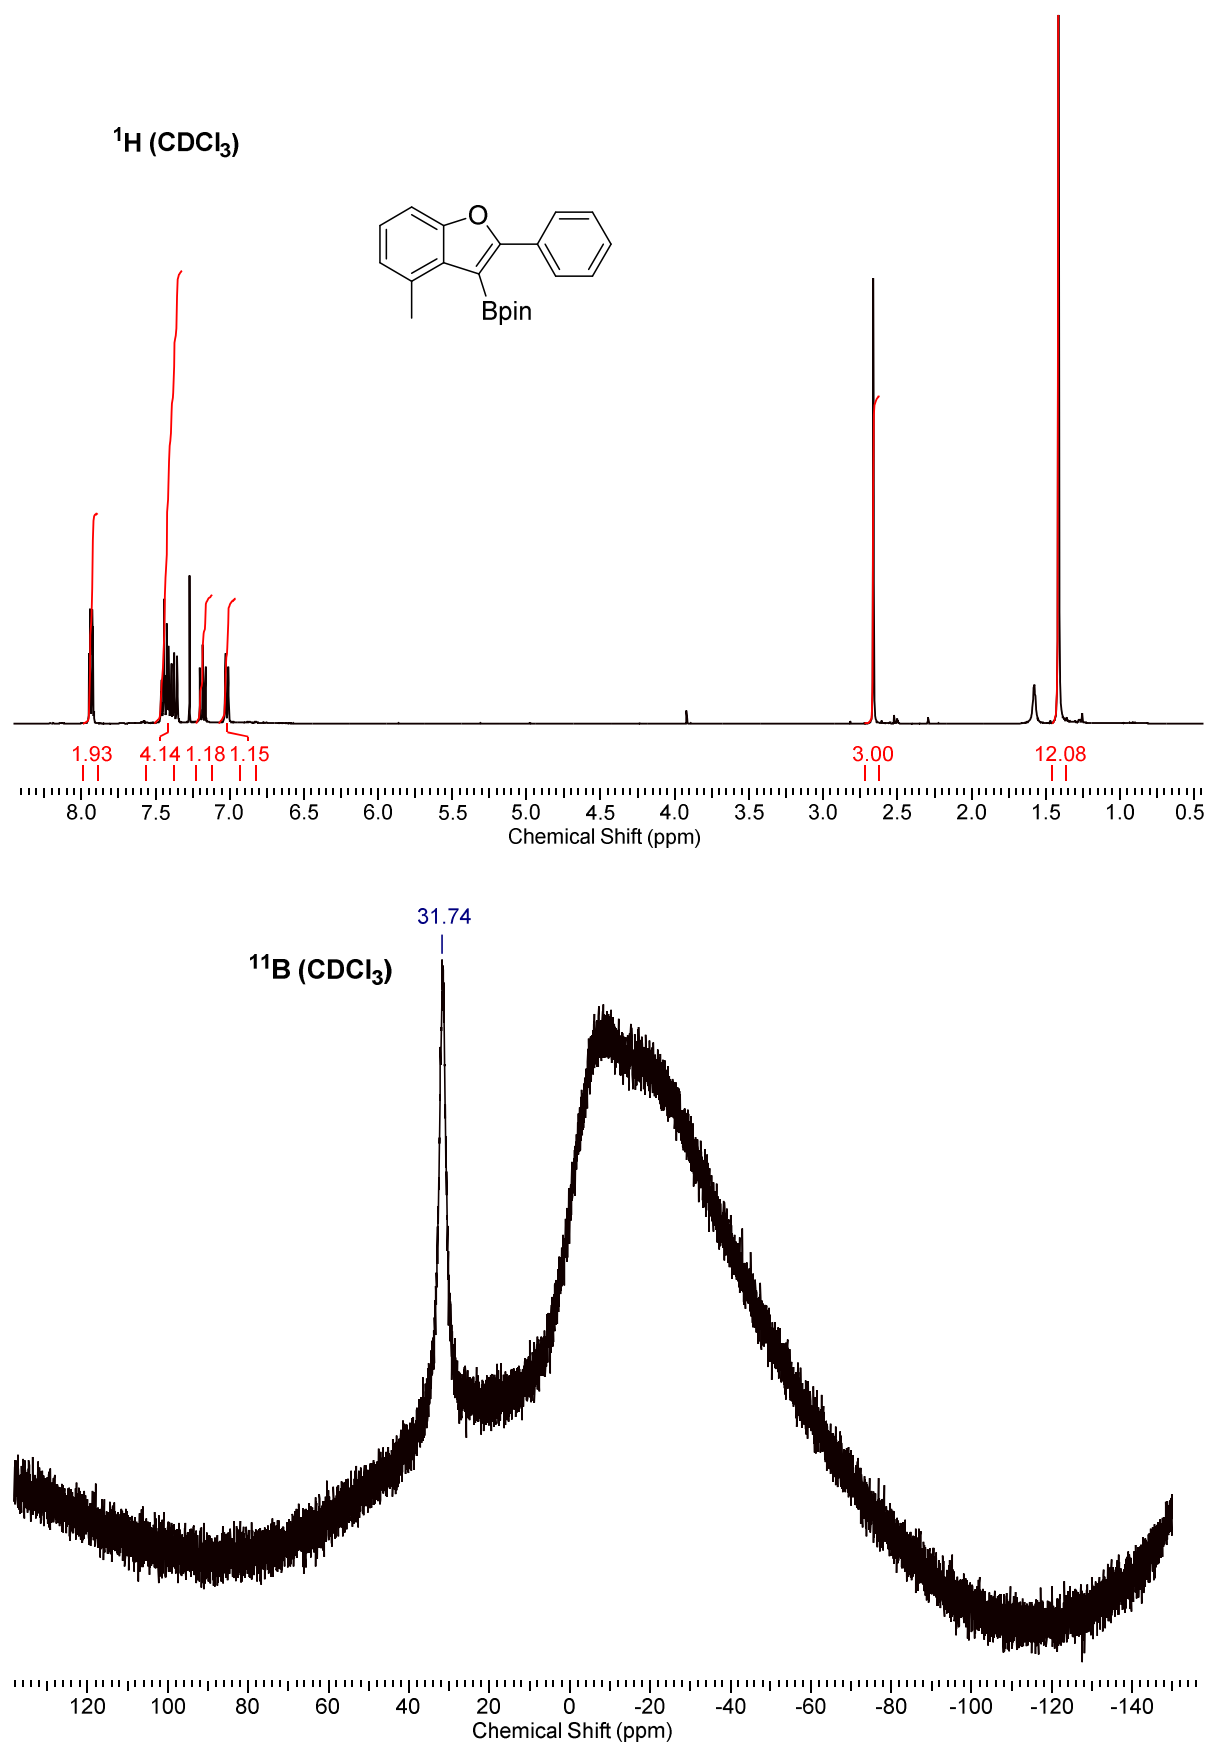

$^{13}\text{C}\{^1\text{H}\}$  ( $\text{CDCl}_3$ )

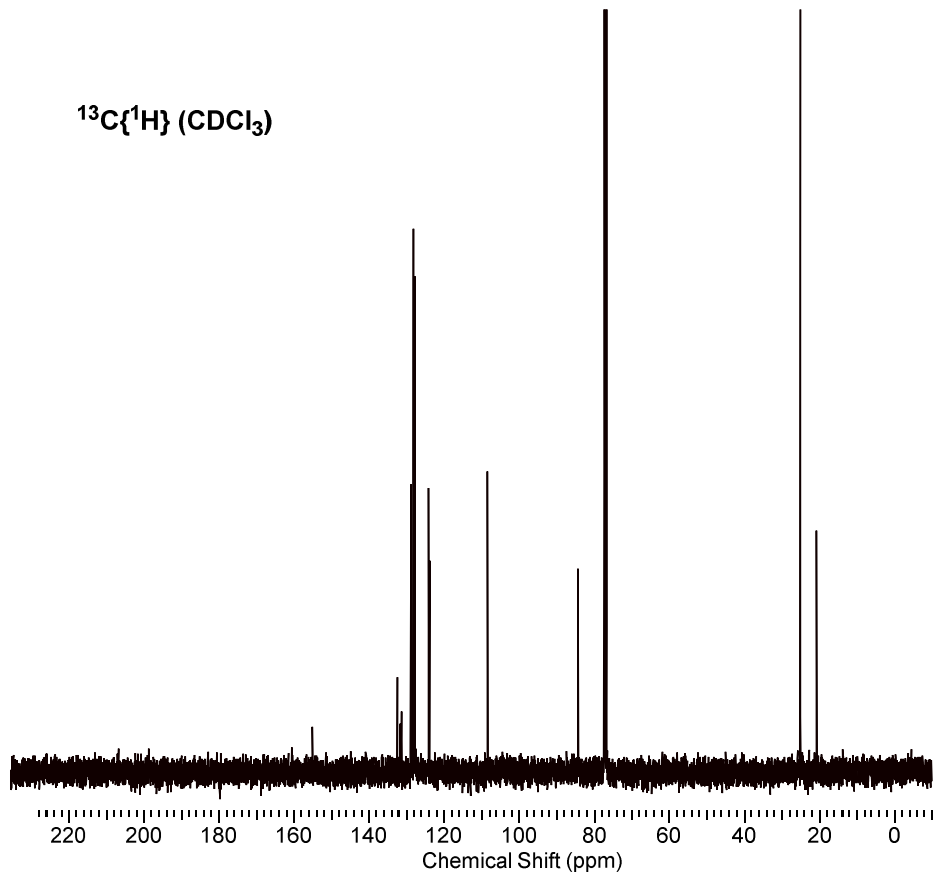

2-(2-benzylbenzofuran-3-yl)-4,4,5,5-tetramethyl-1,3,2-dioxaborolane (4f)

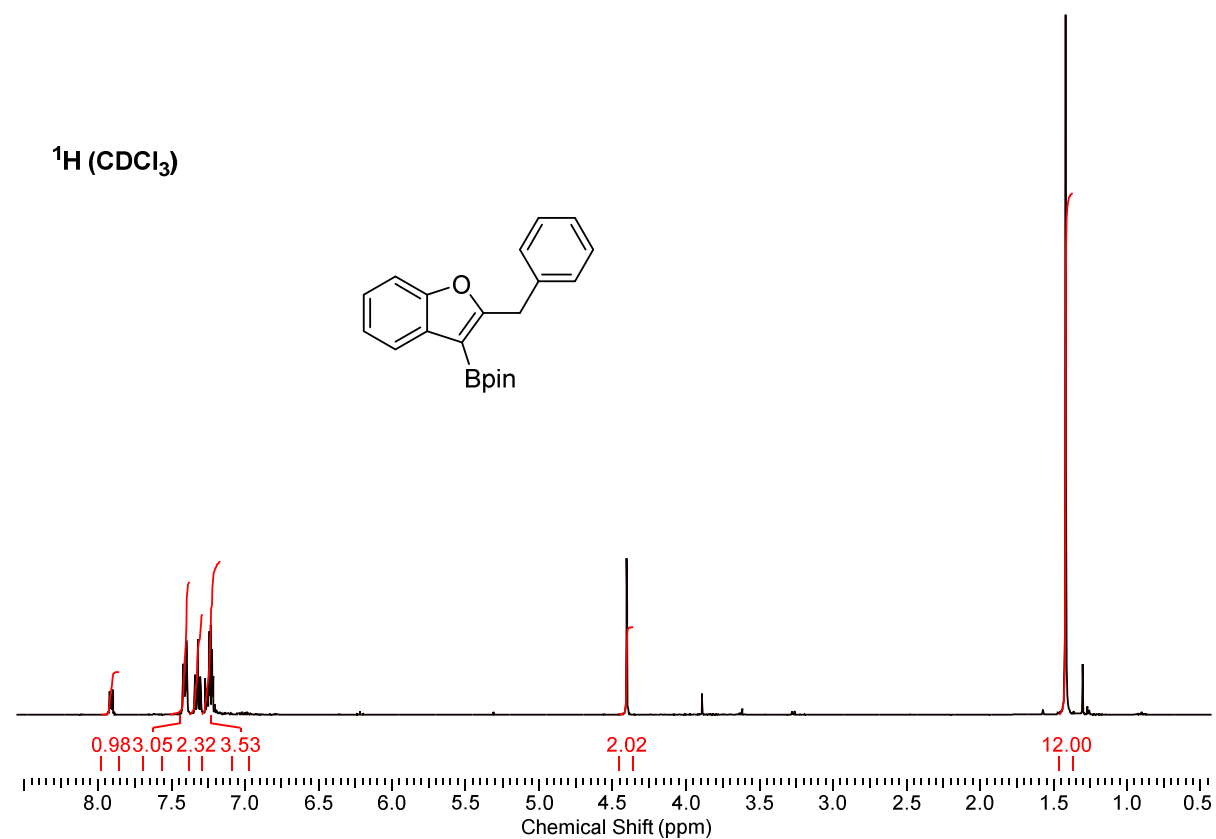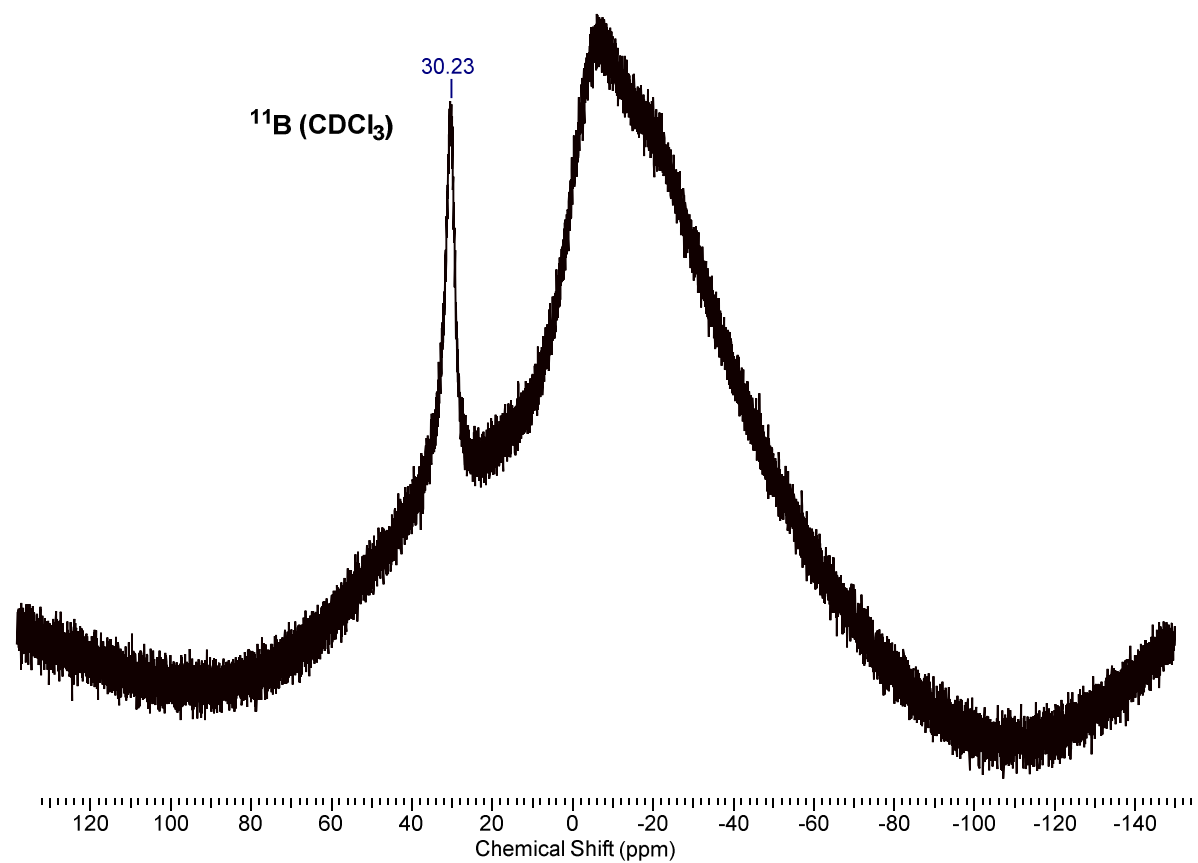

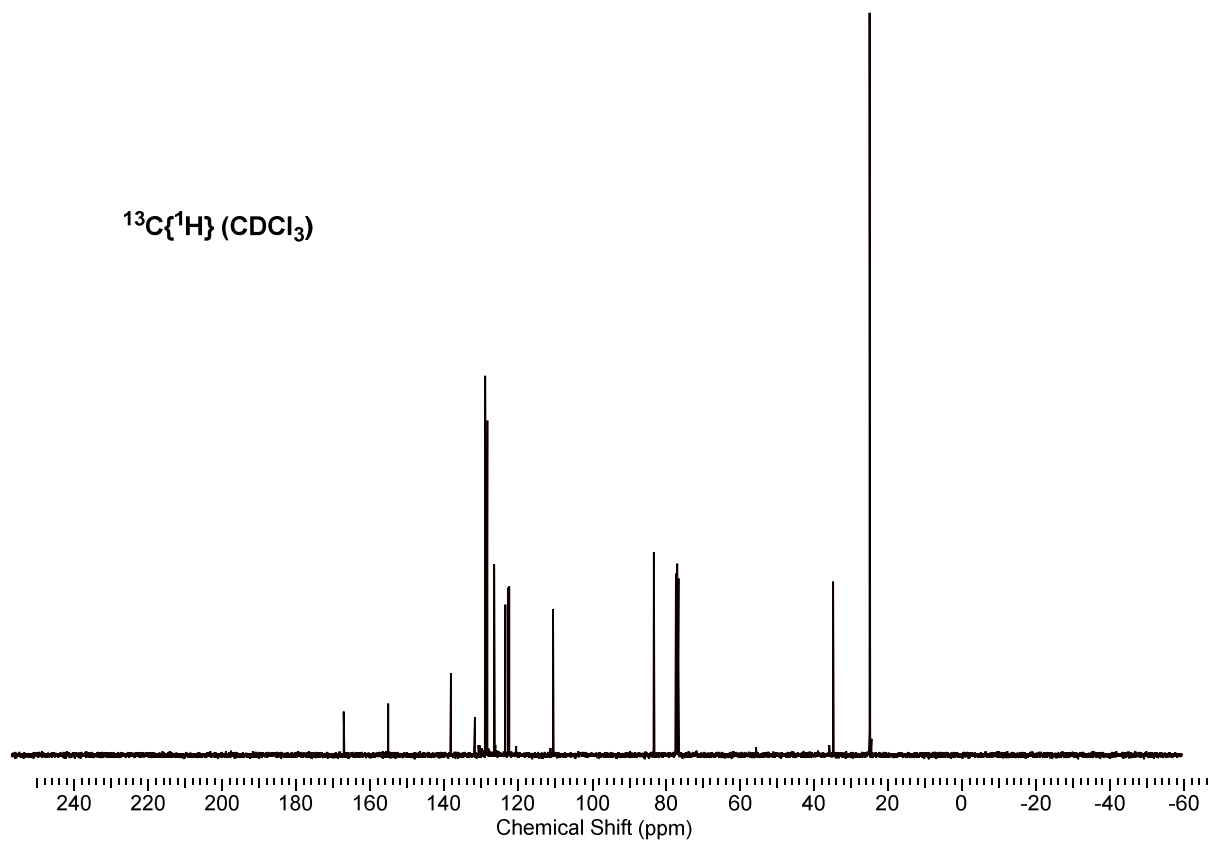

4,4,5,5-tetramethyl-2-(2-methylbenzofuran-3-yl)-1,3,2-dioxaborolane (4g)

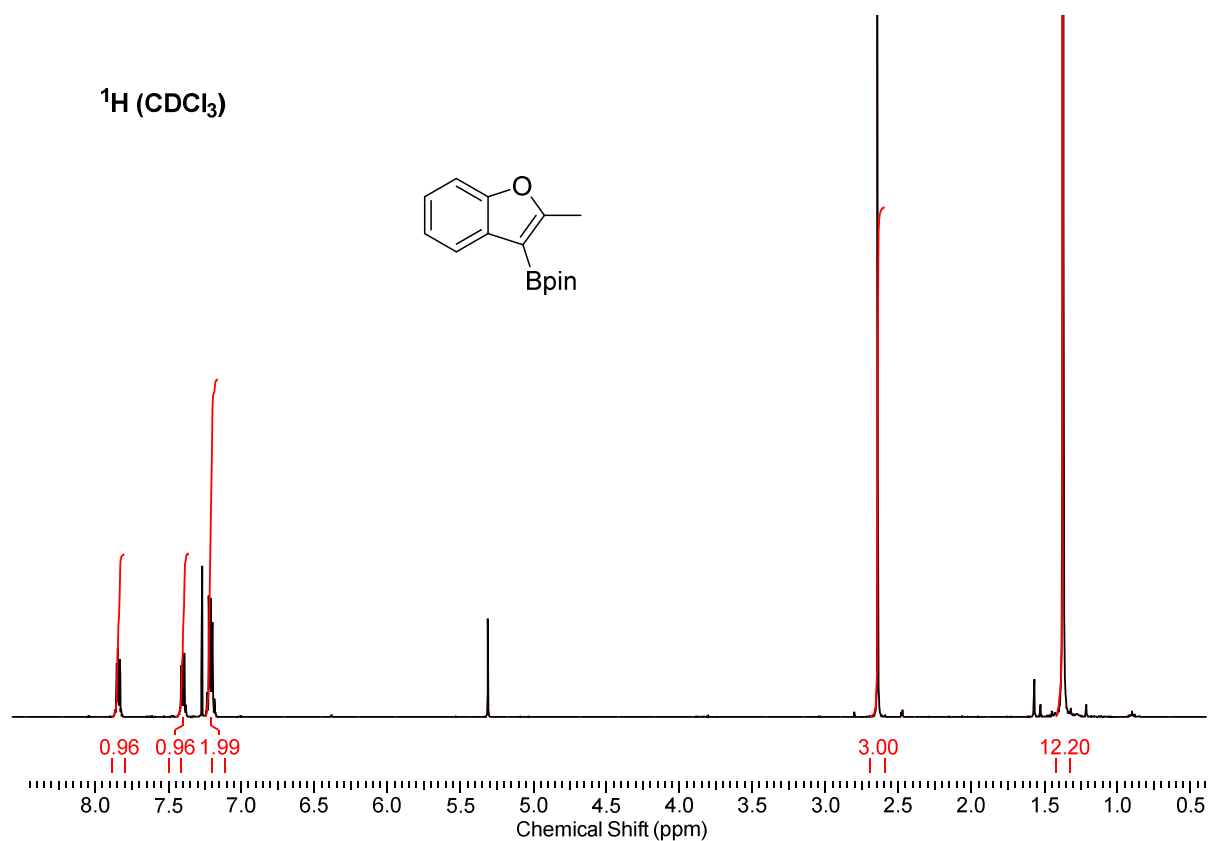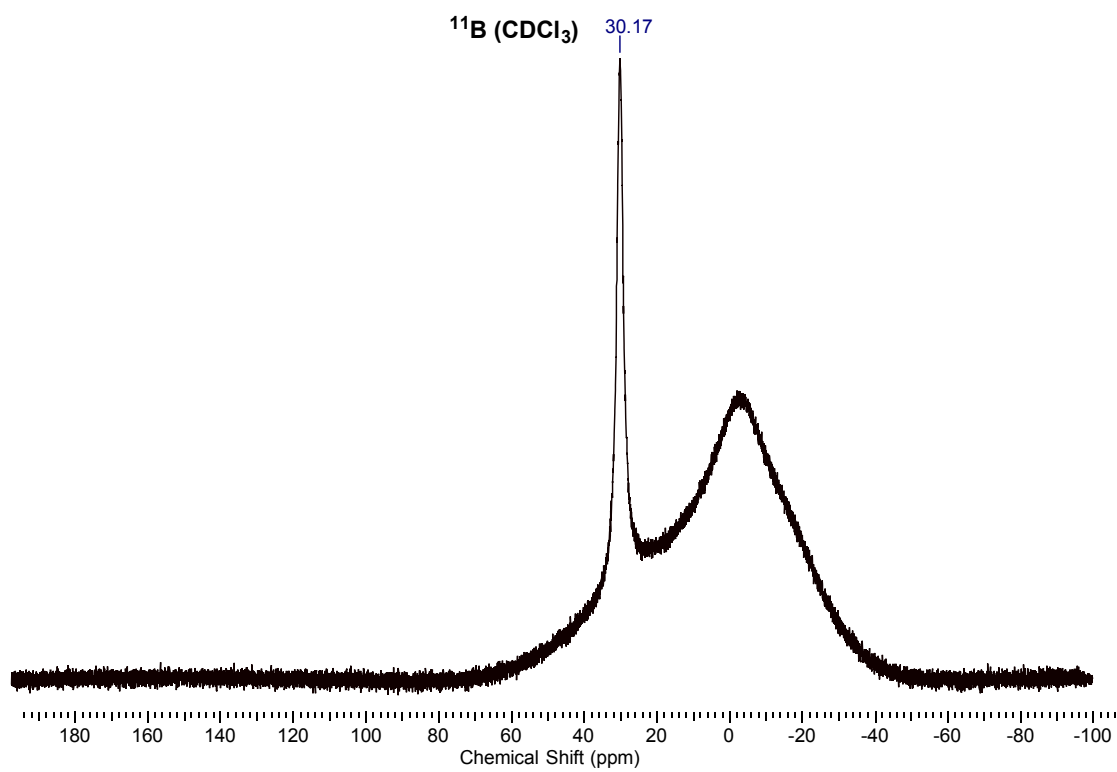

$^{13}\text{C}\{^1\text{H}\}$  ( $\text{CDCl}_3$ )

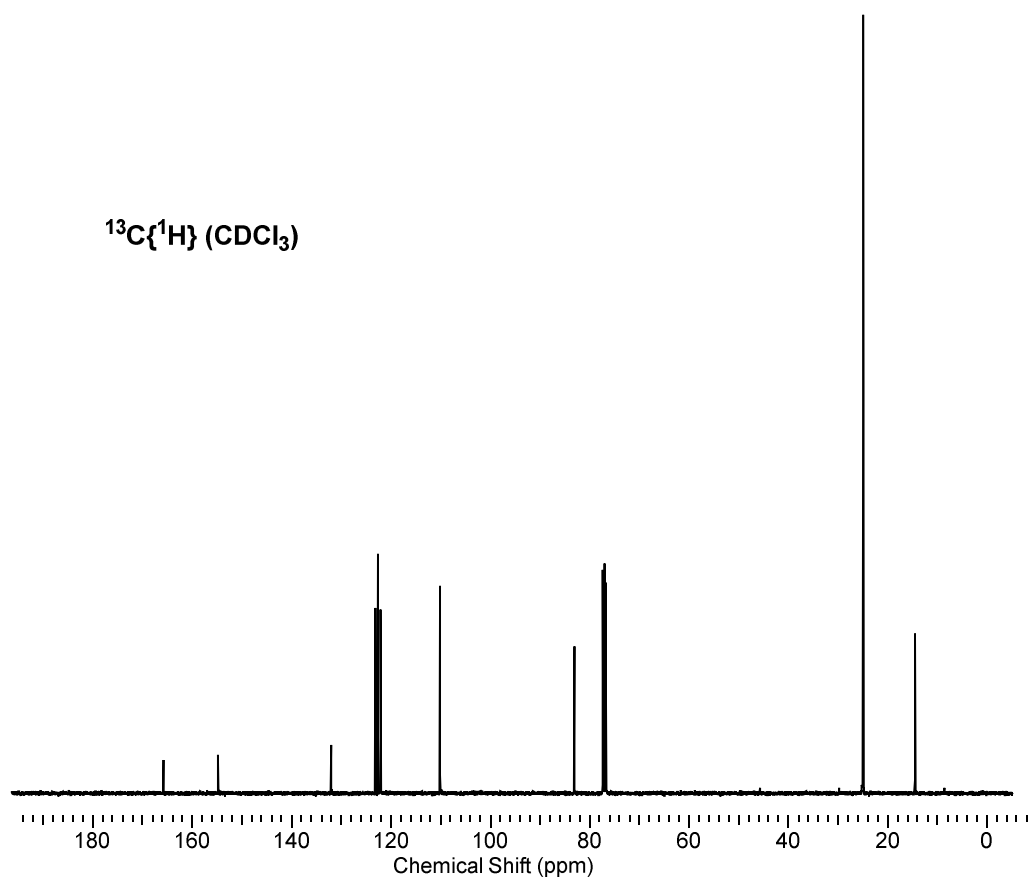



Ethyl 4-(3-(4,4,5,5-tetramethyl-1,3,2-dioxaborolan-2-yl)benzofuran-2-yl)benzoate (**4h**)

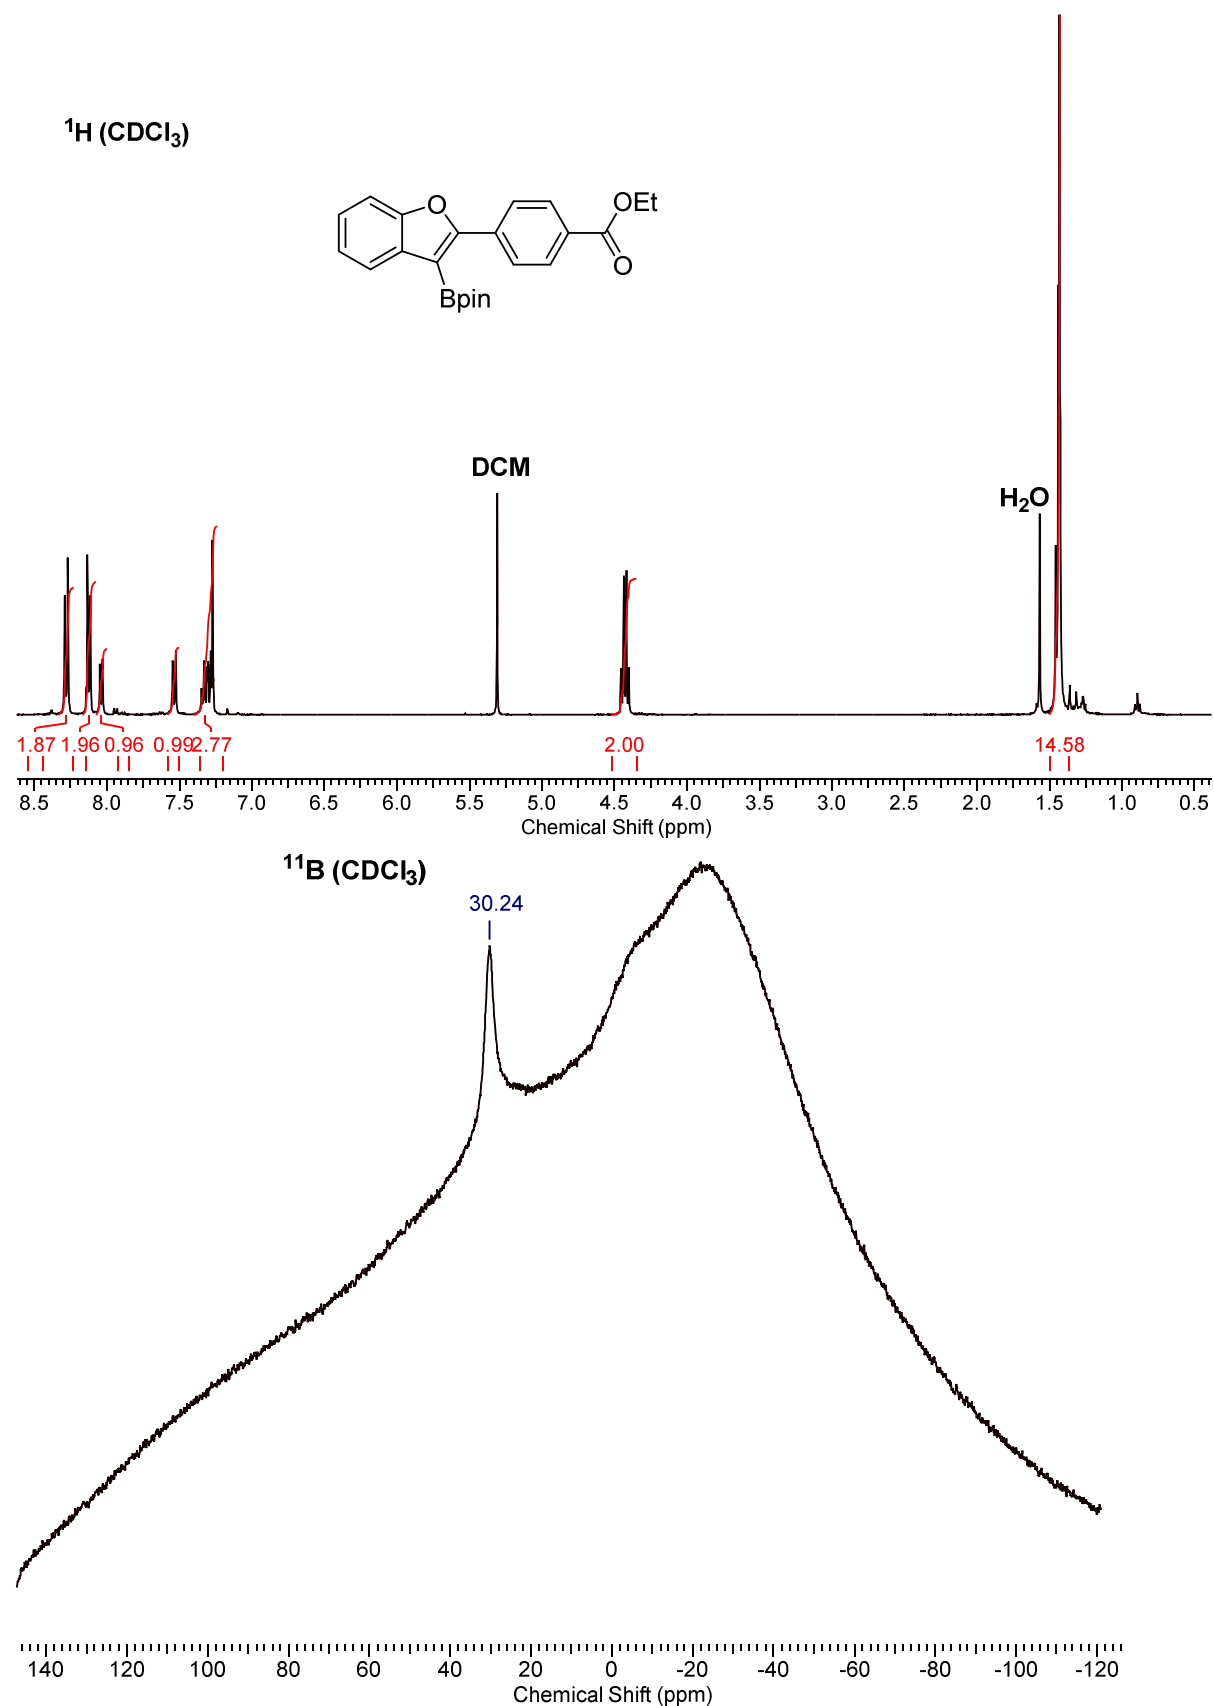

$^{13}\text{C}\{^1\text{H}\}$  ( $\text{CDCl}_3$ )

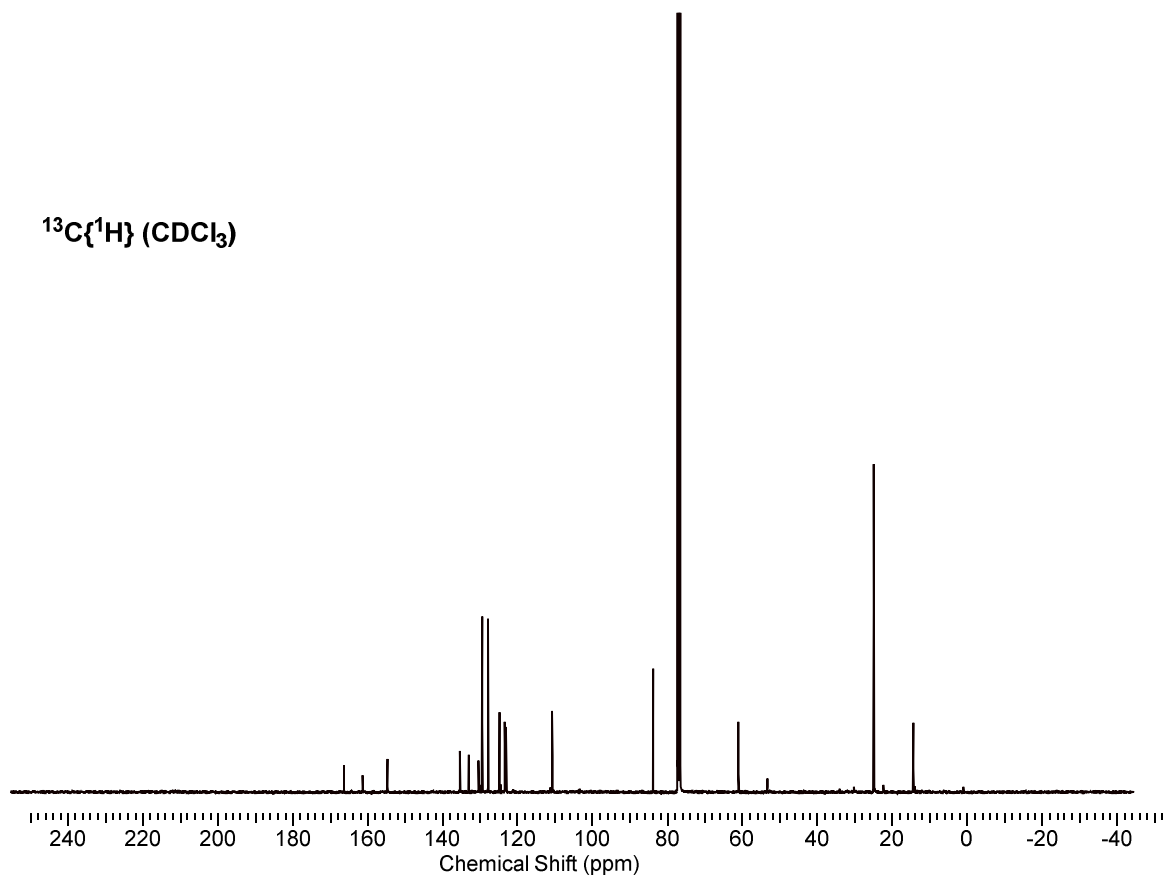

## Oxygen-directed *trans*-haloboration 5

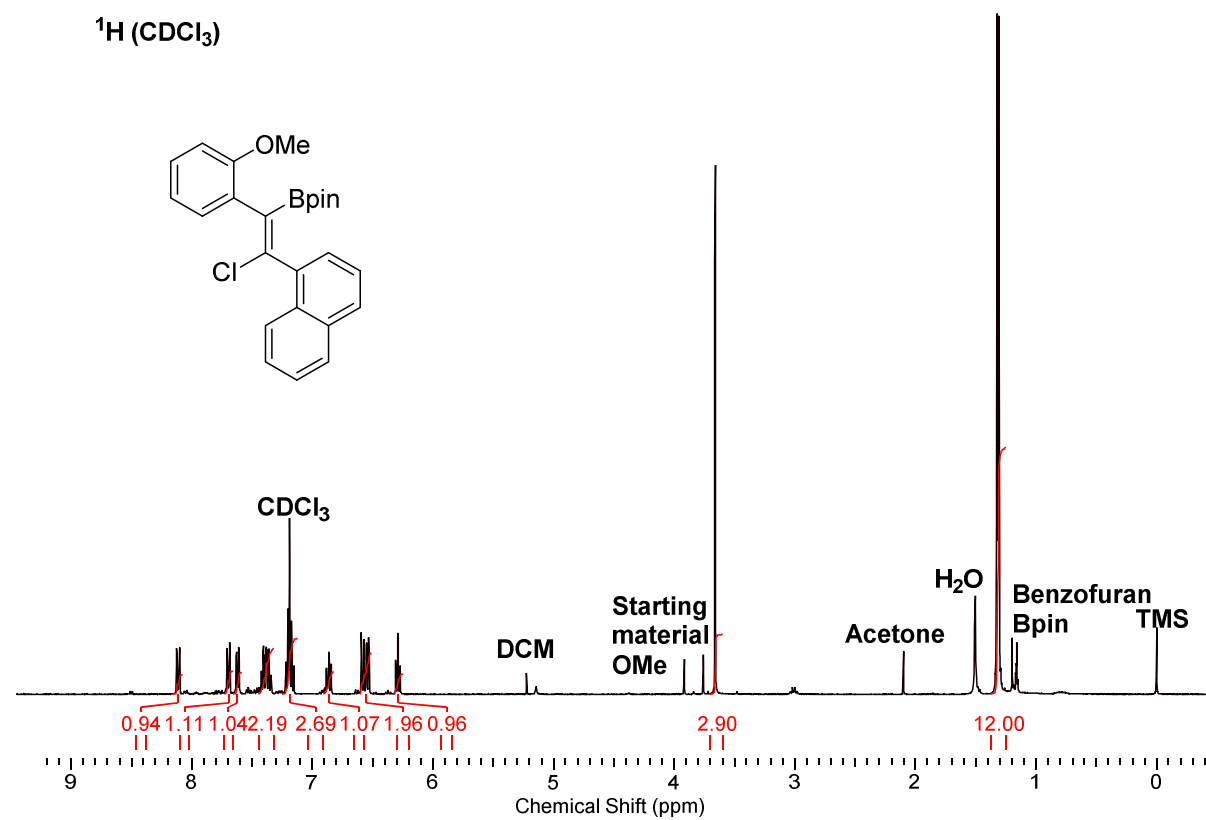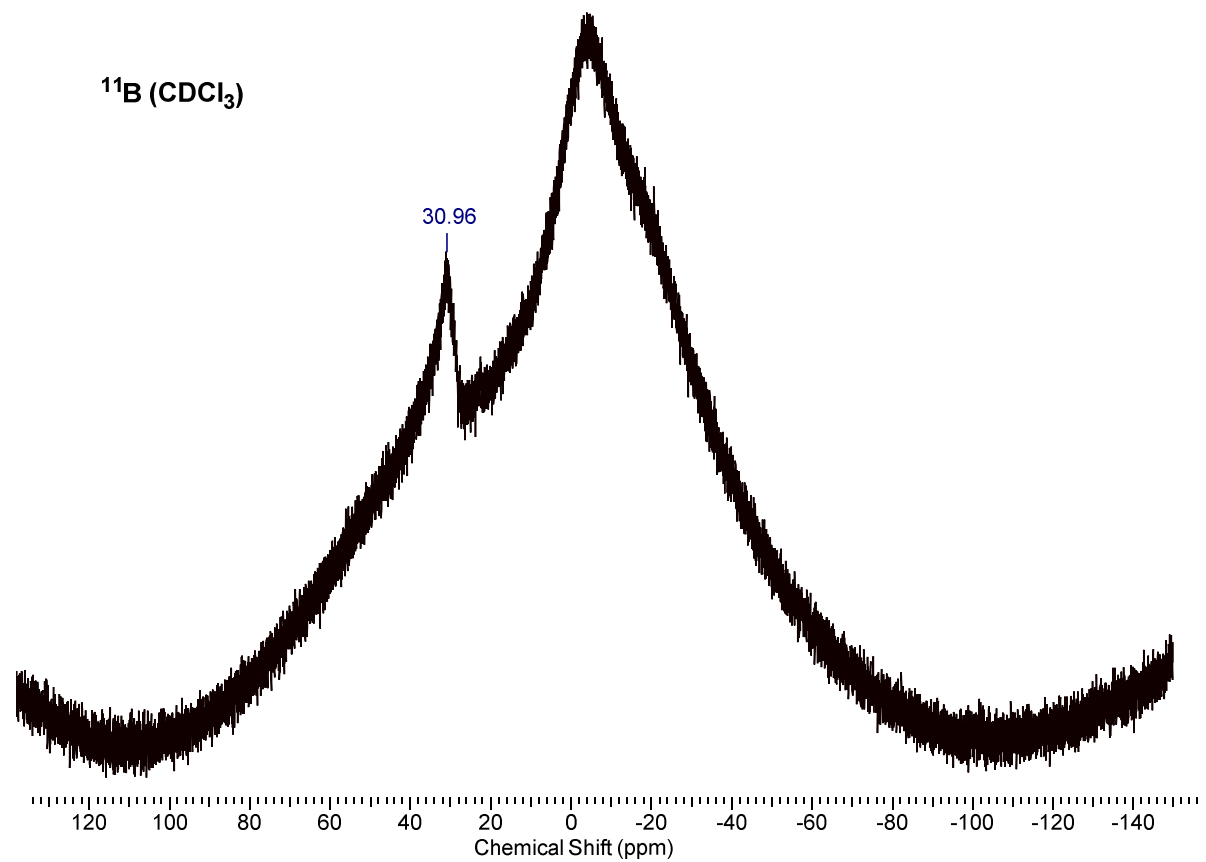

$^{13}\text{C}\{^1\text{H}\}$  ( $\text{CDCl}_3$ )

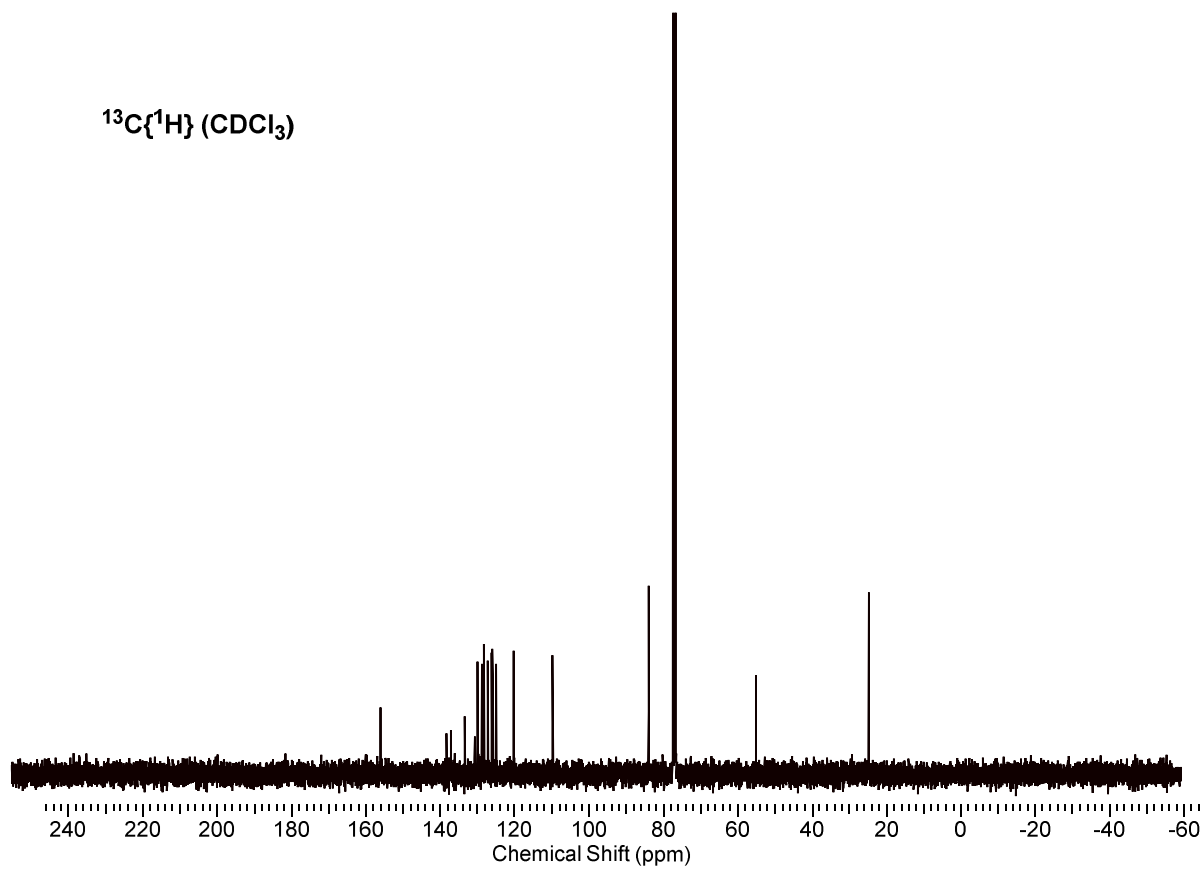

((2,5-dimethoxy-1,4-phenylene)bis(ethyne-2,1-diyl))dibenzene (6)

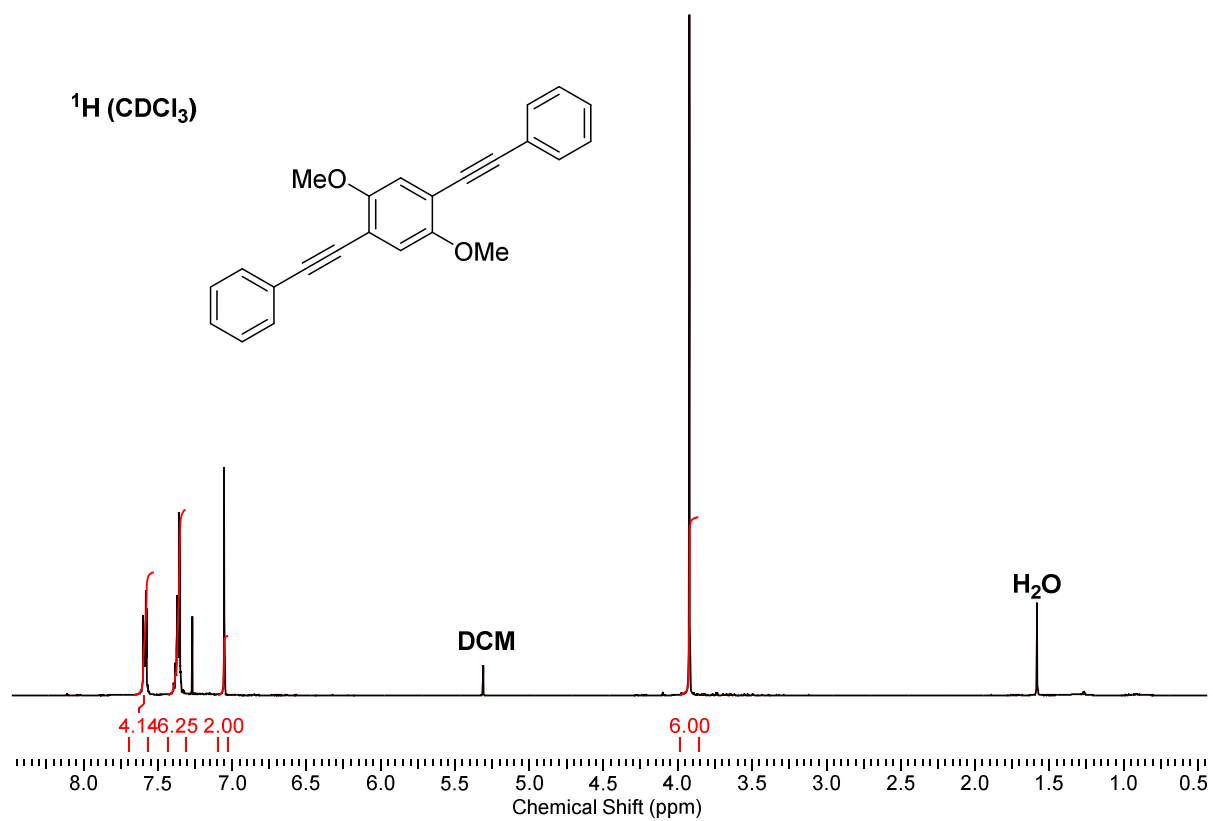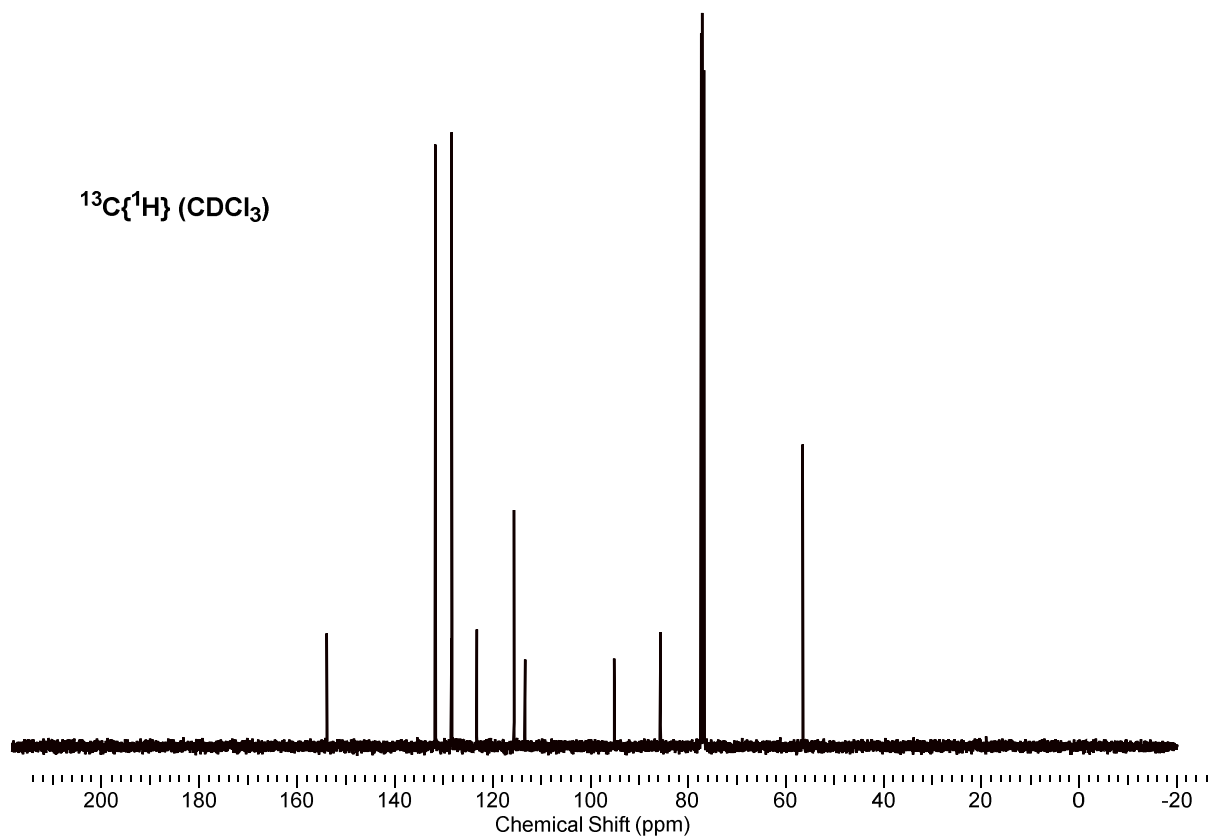

2,2'-(2,6-diphenylbenzo[1,2-b:4,5-b']difuran-3,7-diyl)bis(4,4,5,5-tetramethyl-1,3,2-dioxaborolane) (7)

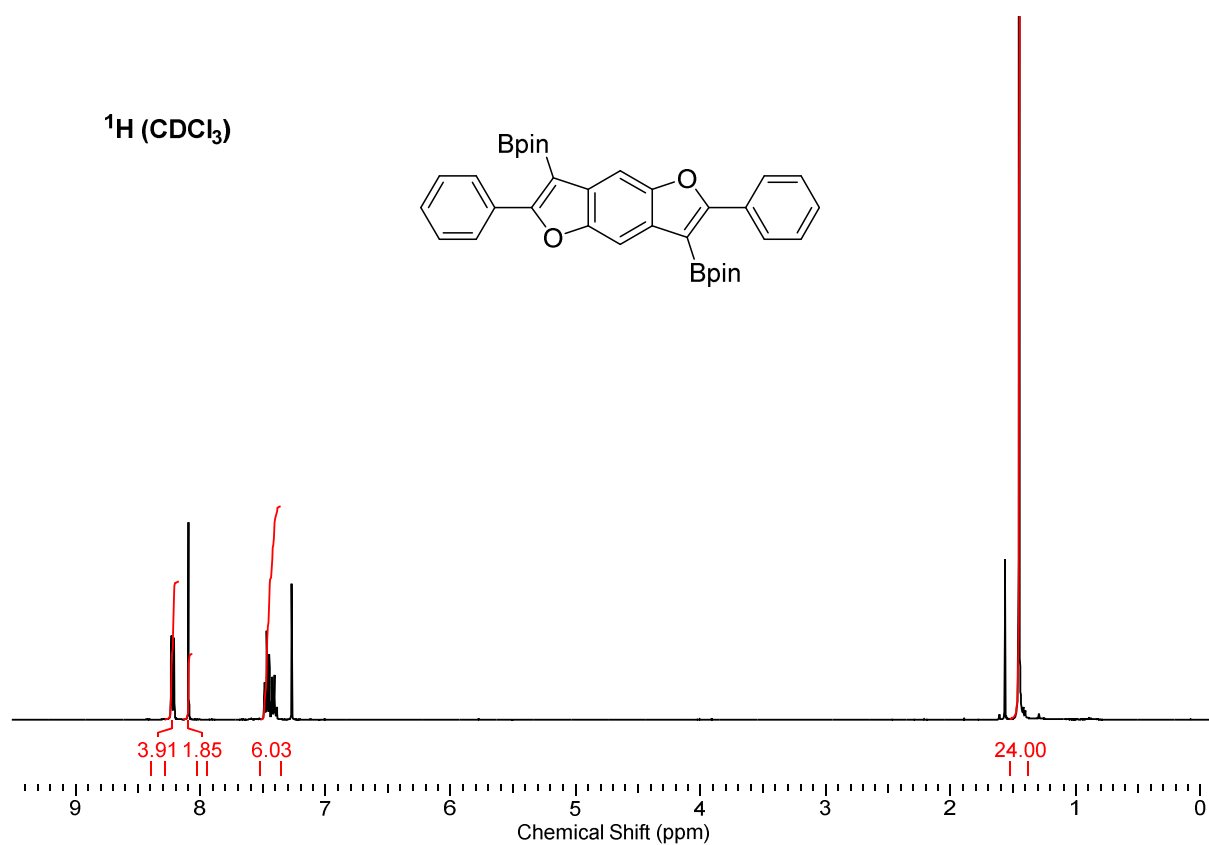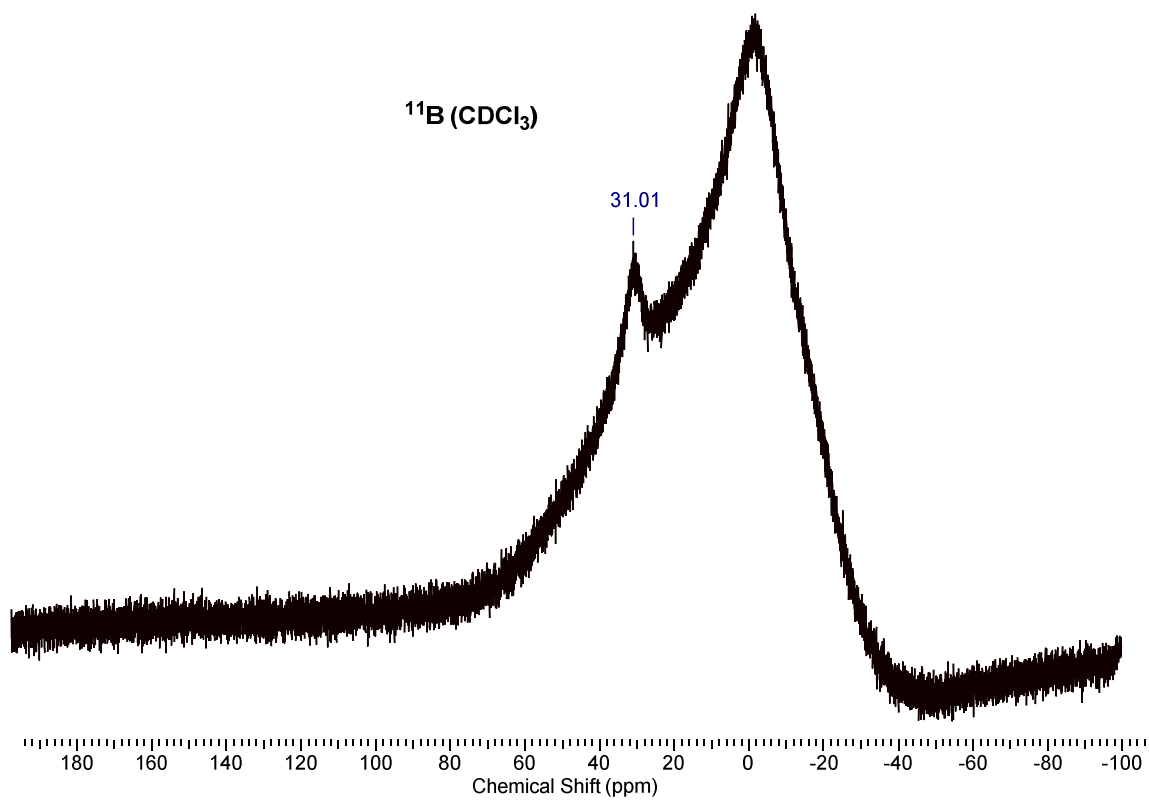

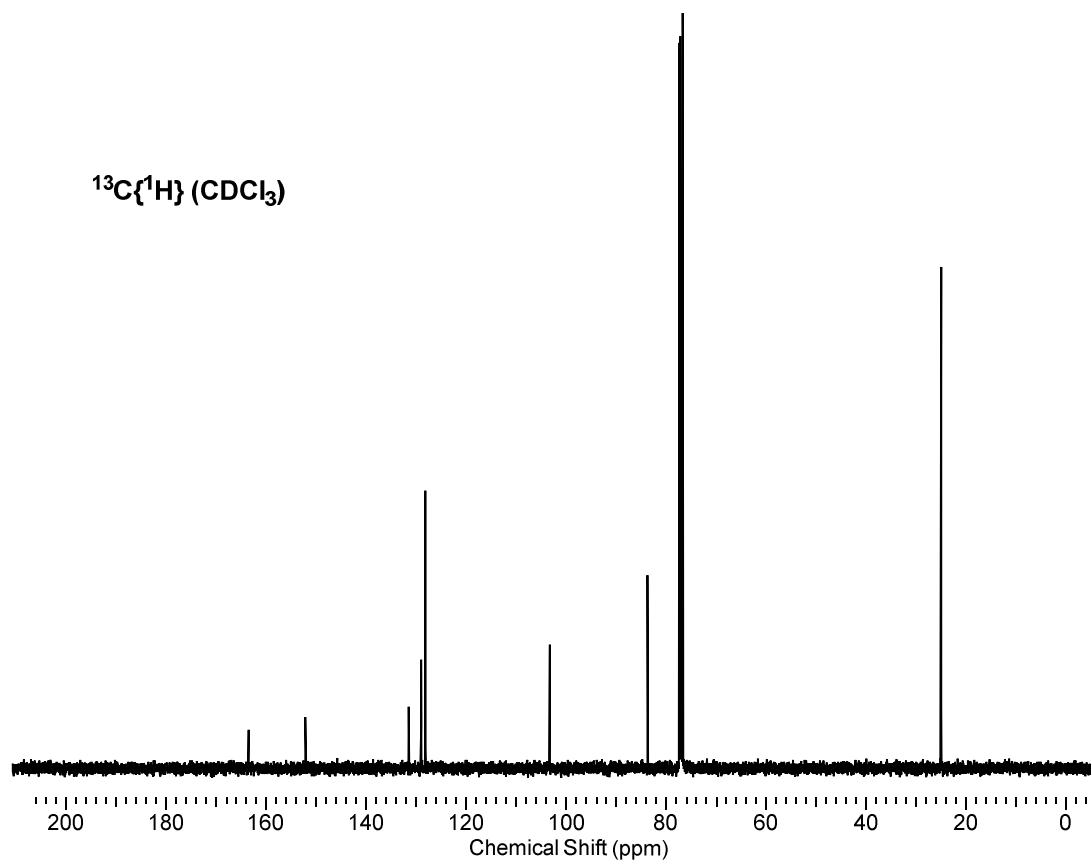

5-methyl-2-phenyl-3-(p-tolyl)benzofuran (**8**)

$^1\text{H}$  ( $\text{CDCl}_3$ )

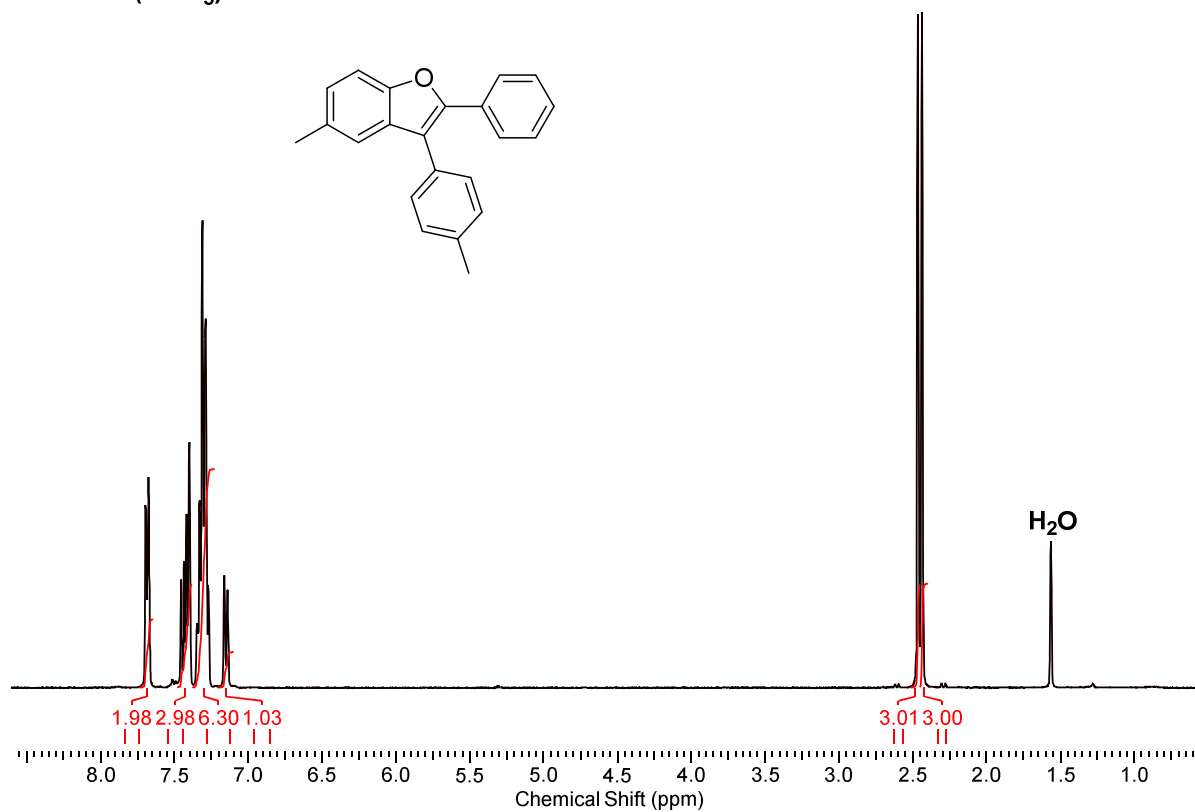

$^{13}\text{C}\{^1\text{H}\}$  ( $\text{CDCl}_3$ )

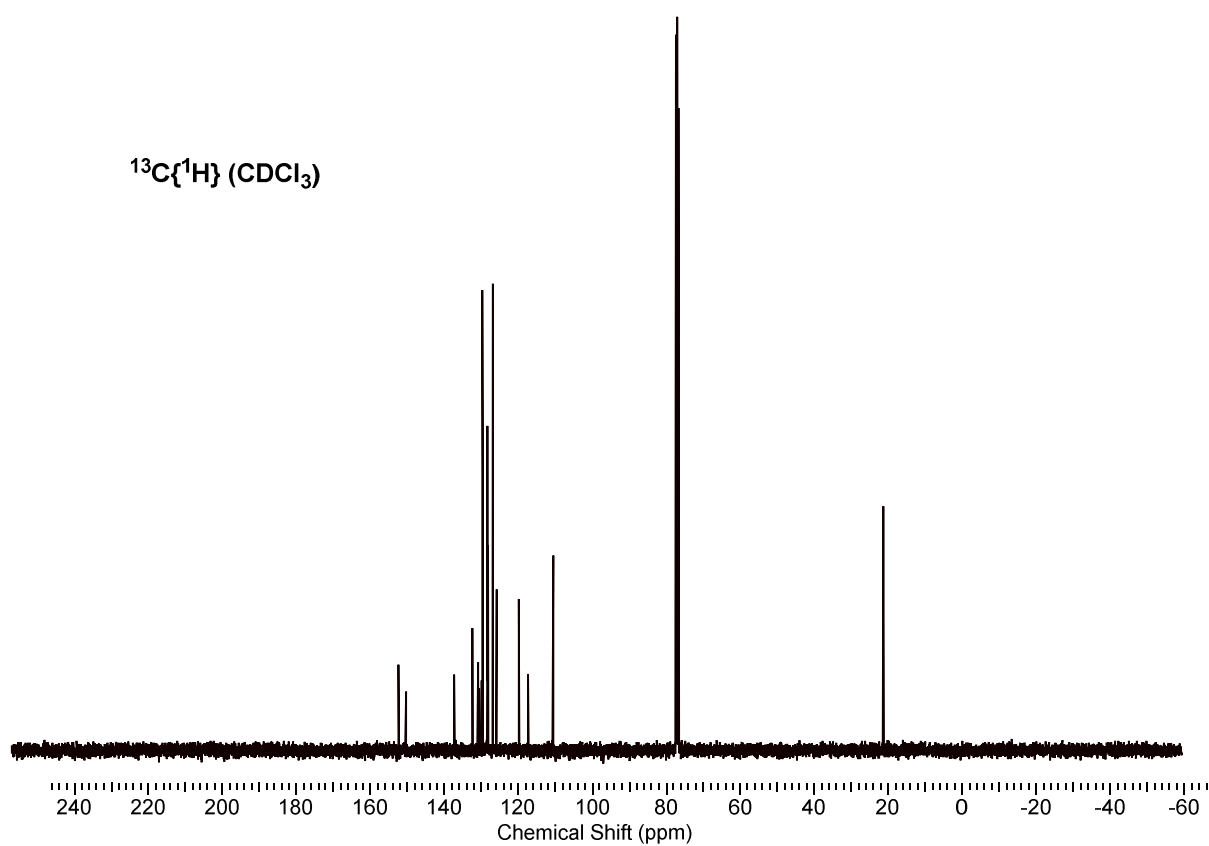



Cross coupling reaction to generate 2-methyl-3-(p-tolyl)benzofuran

$^1\text{H}$  ( $\text{CDCl}_3$ )

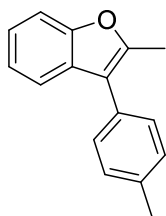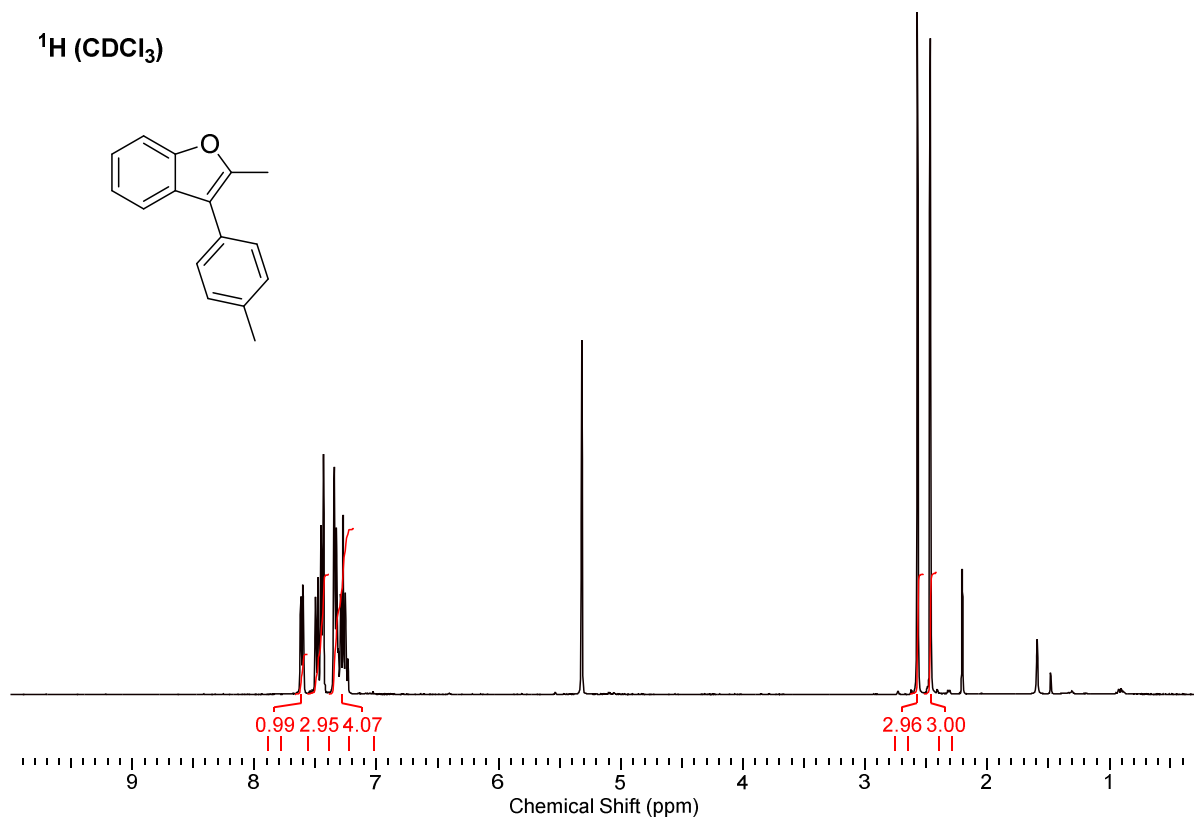

$^{13}\text{C}$   $\{^1\text{H}\}$  ( $\text{CDCl}_3$ )

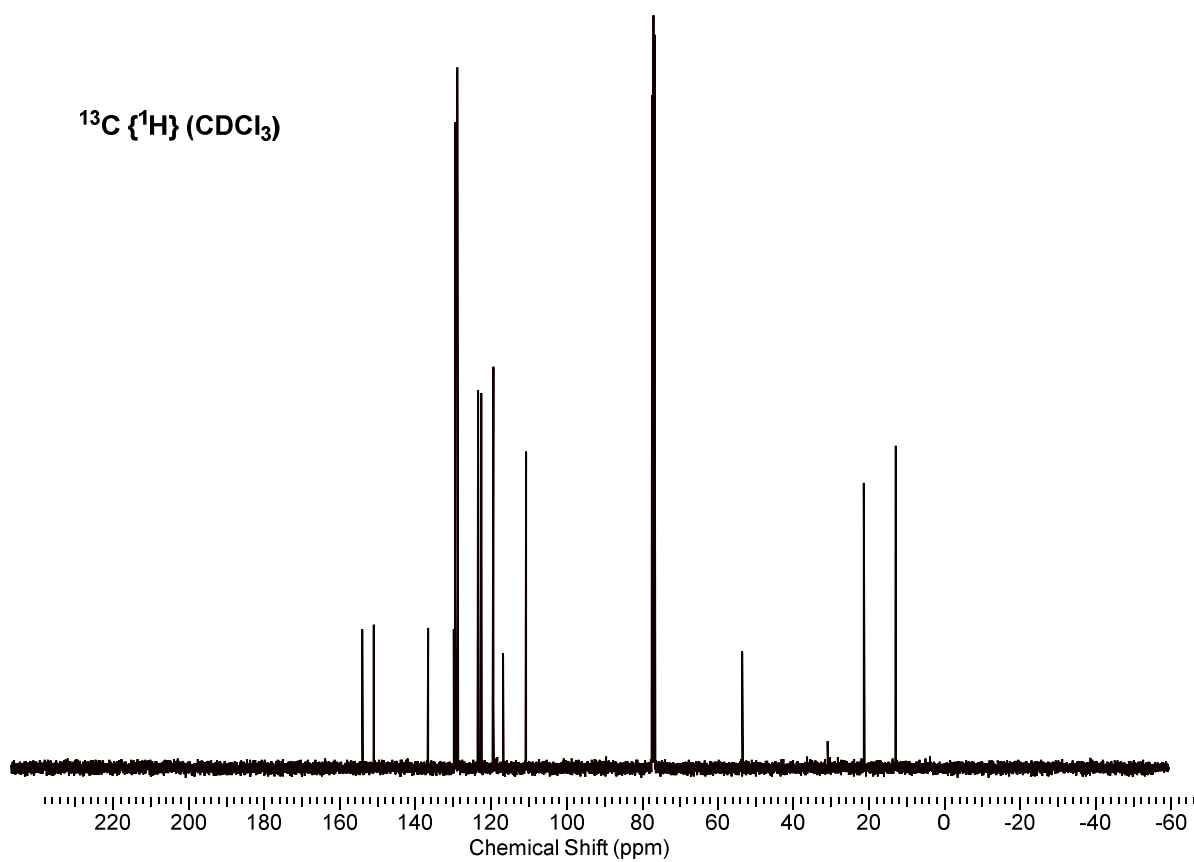

**4,4,5,5-tetramethyl-2-(2-phenylbenzo[b]thiophen-3-yl)-1,3,2-dioxaborolane (9a)**

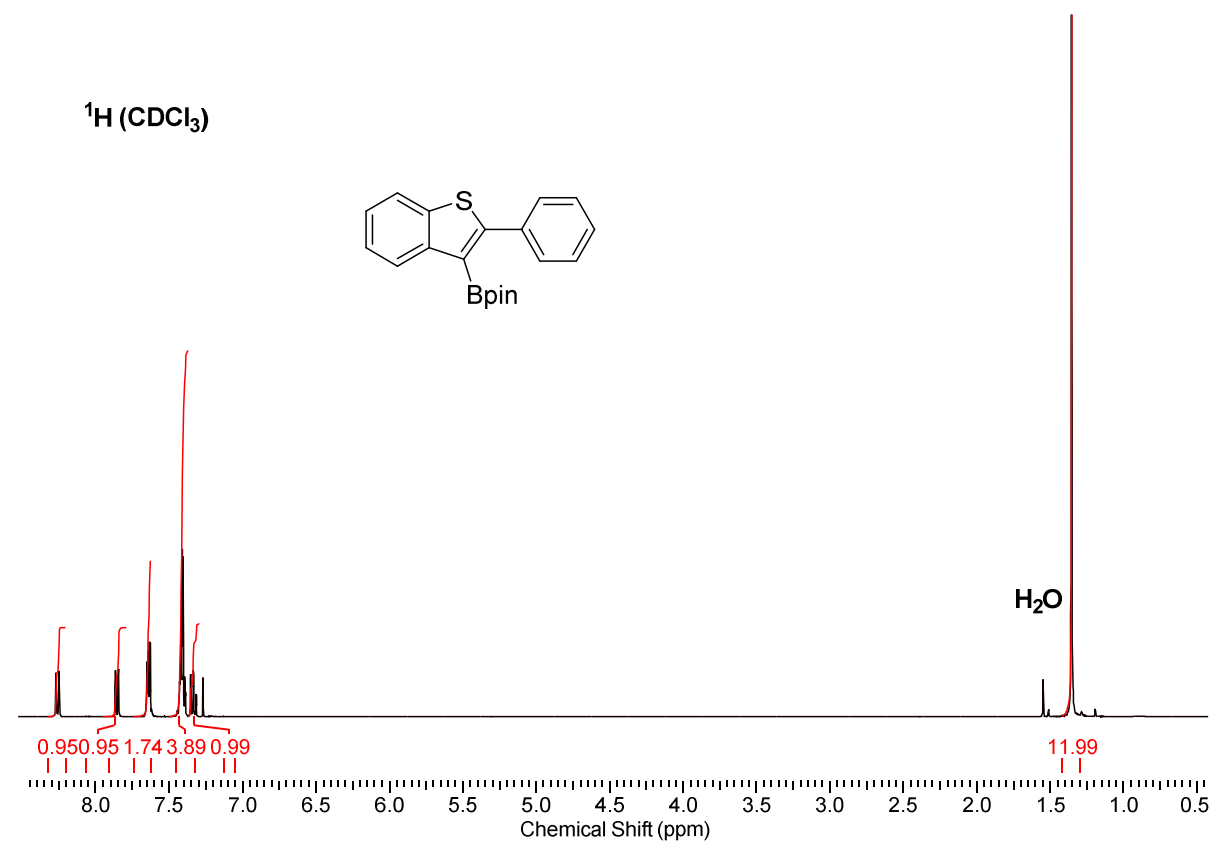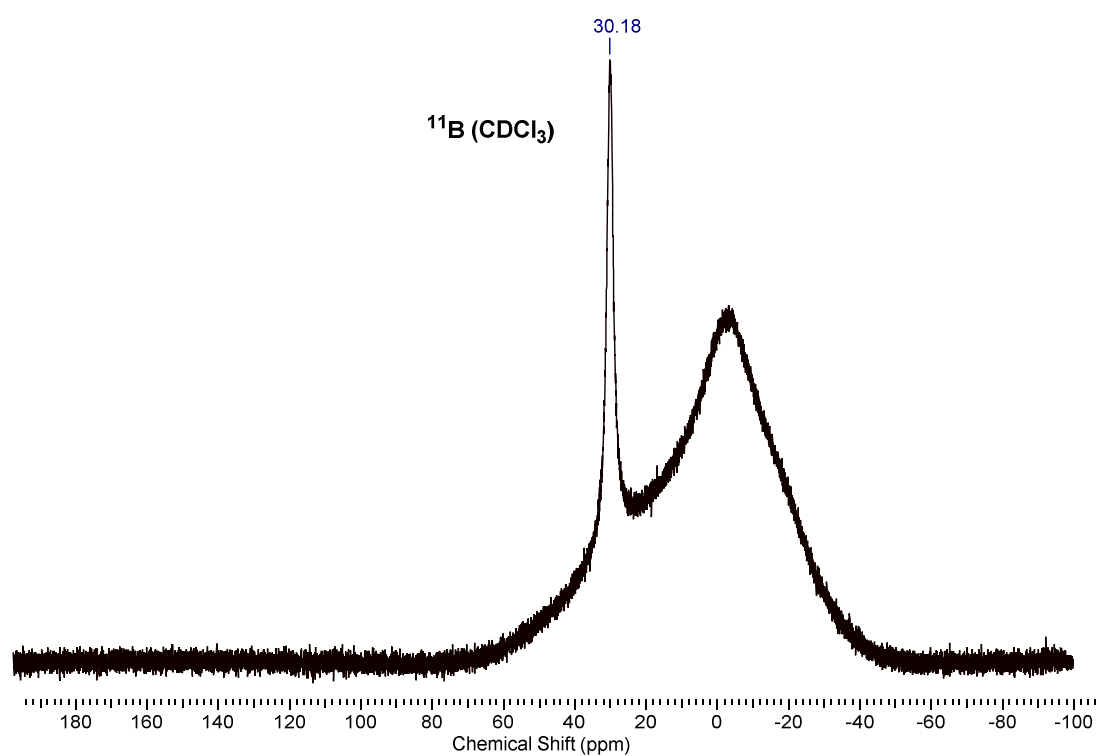

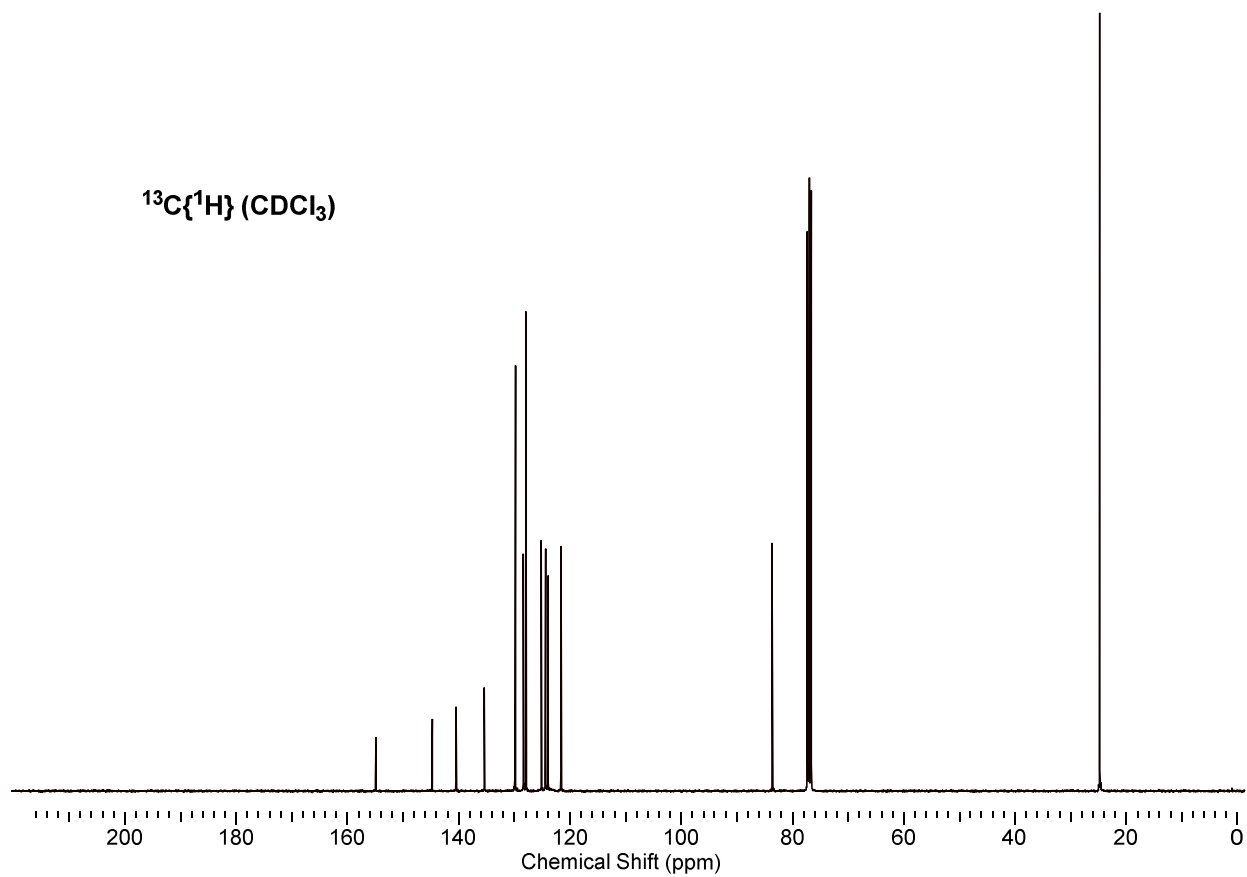

4,4,5,5-tetramethyl-2-(2-(naphthalen-1-yl)benzo[b]thiophen-3-yl)-1,3,2-dioxaborolane (9b)

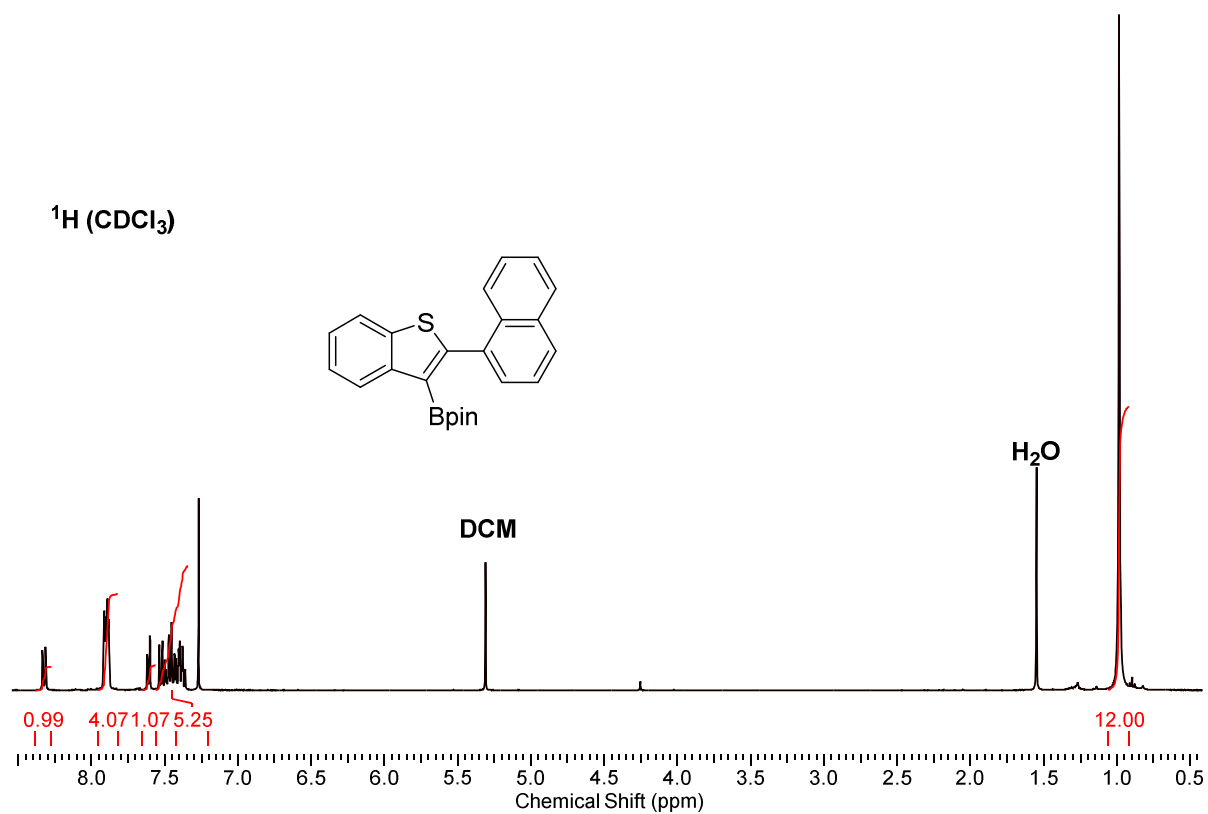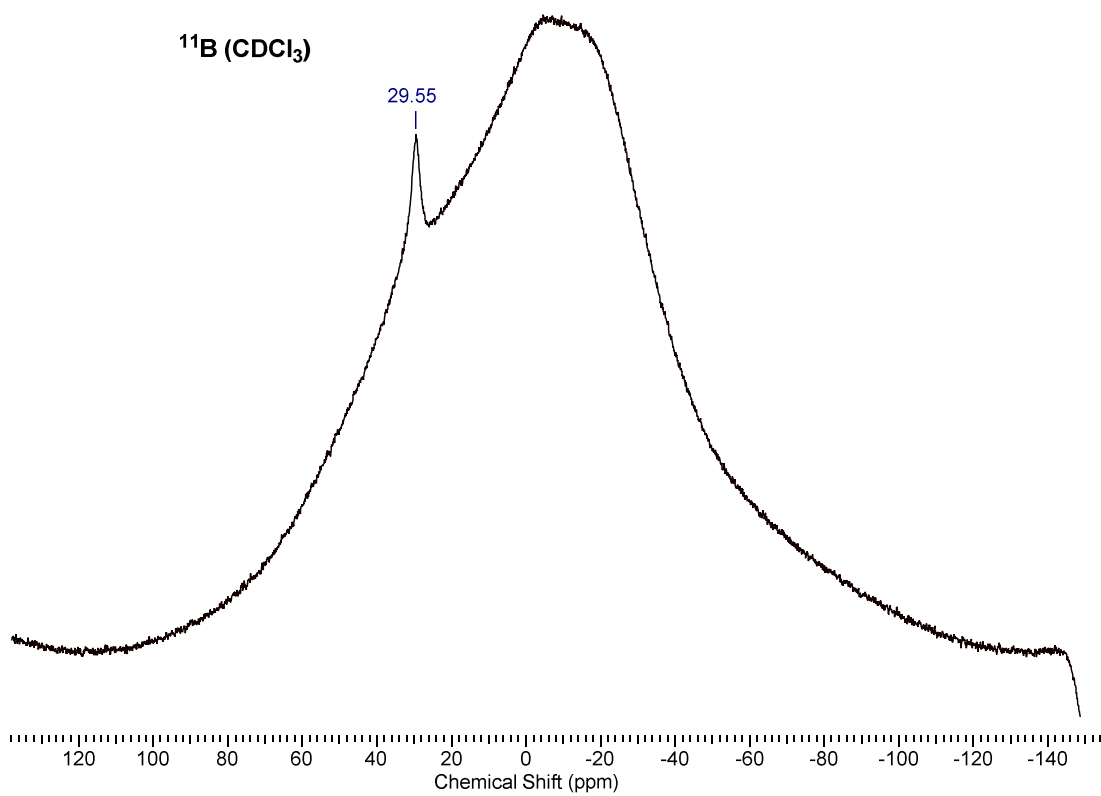

$^{13}\text{C}\{^1\text{H}\}$  ( $\text{CDCl}_3$ )

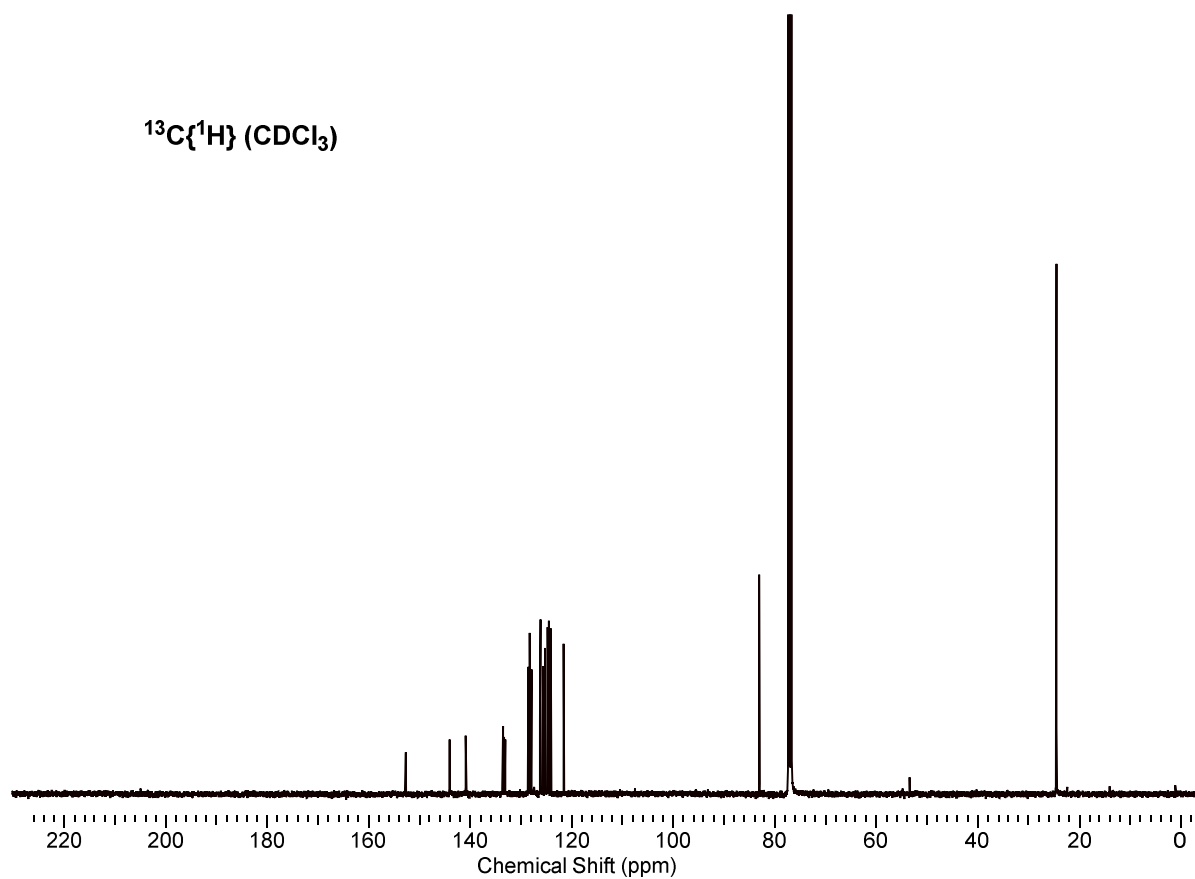

2-(2-mesitylbenzo[b]thiophen-3-yl)-4,4,5,5-tetramethyl-1,3,2-dioxaborolane (9c)

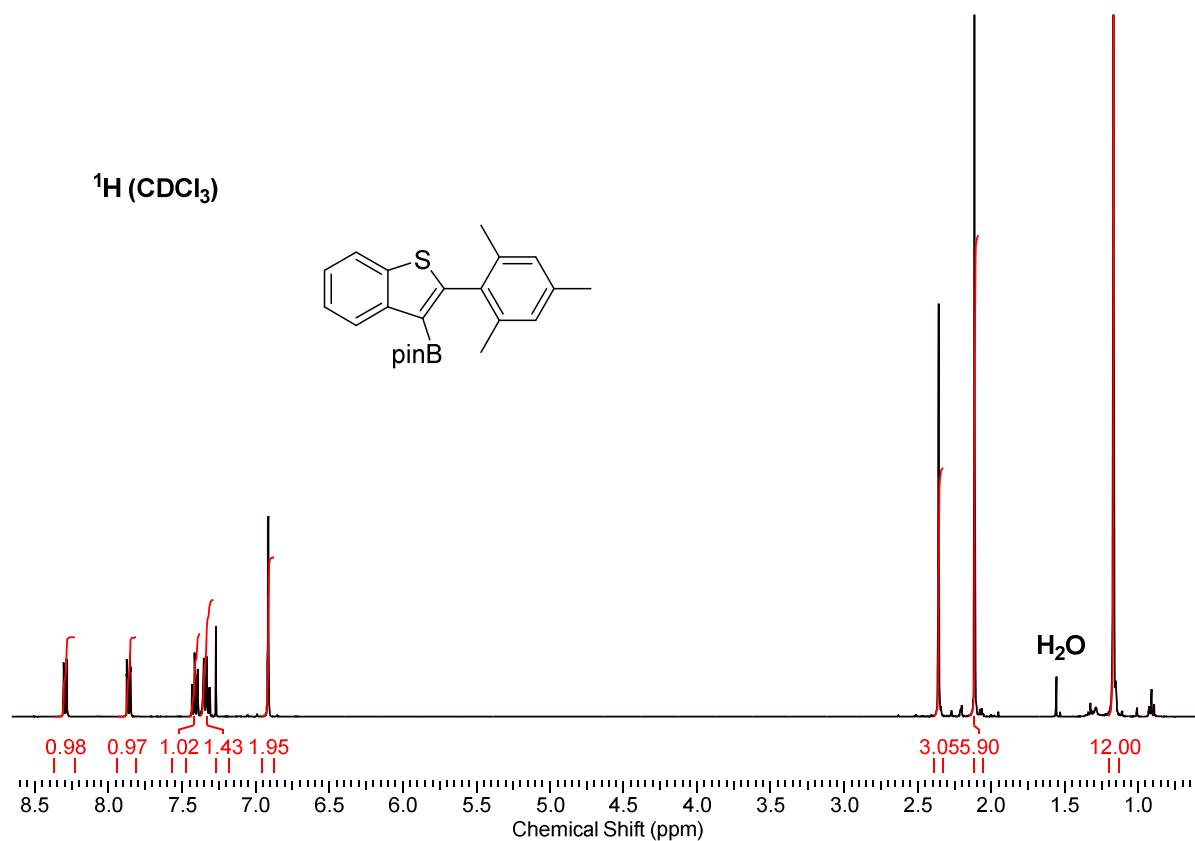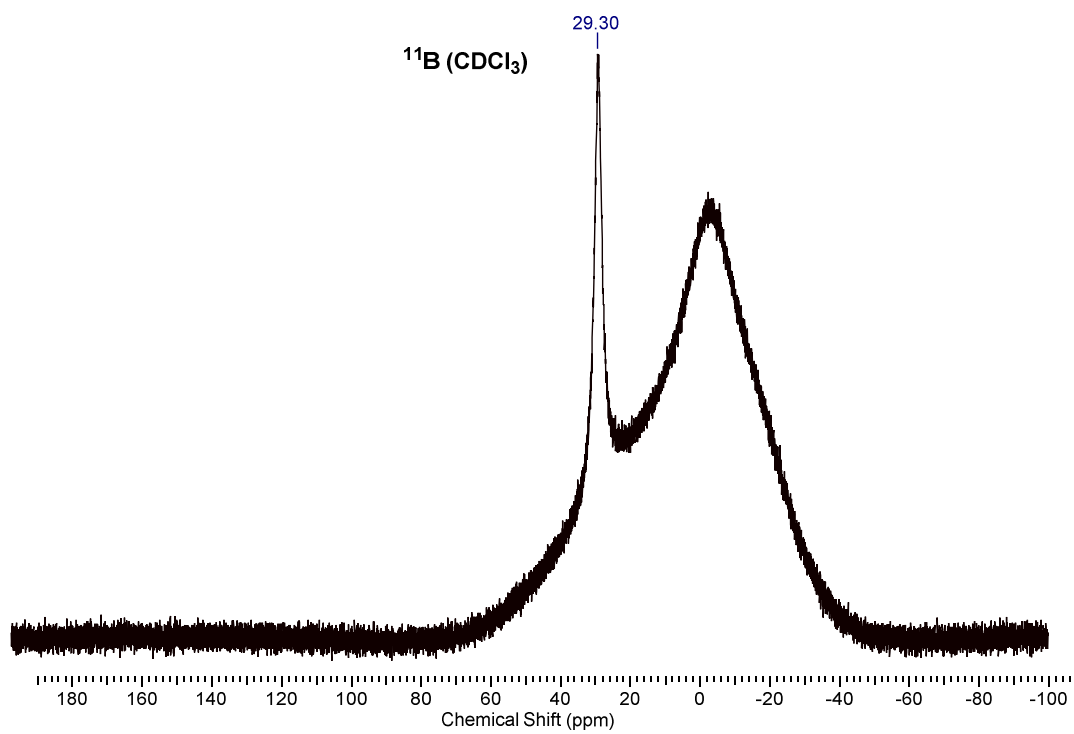



4,4,5,5-tetramethyl-2-(2-(thiophen-3-yl)benzo[b]thiophen-3-yl)-1,3,2-dioxaborolane (9d)

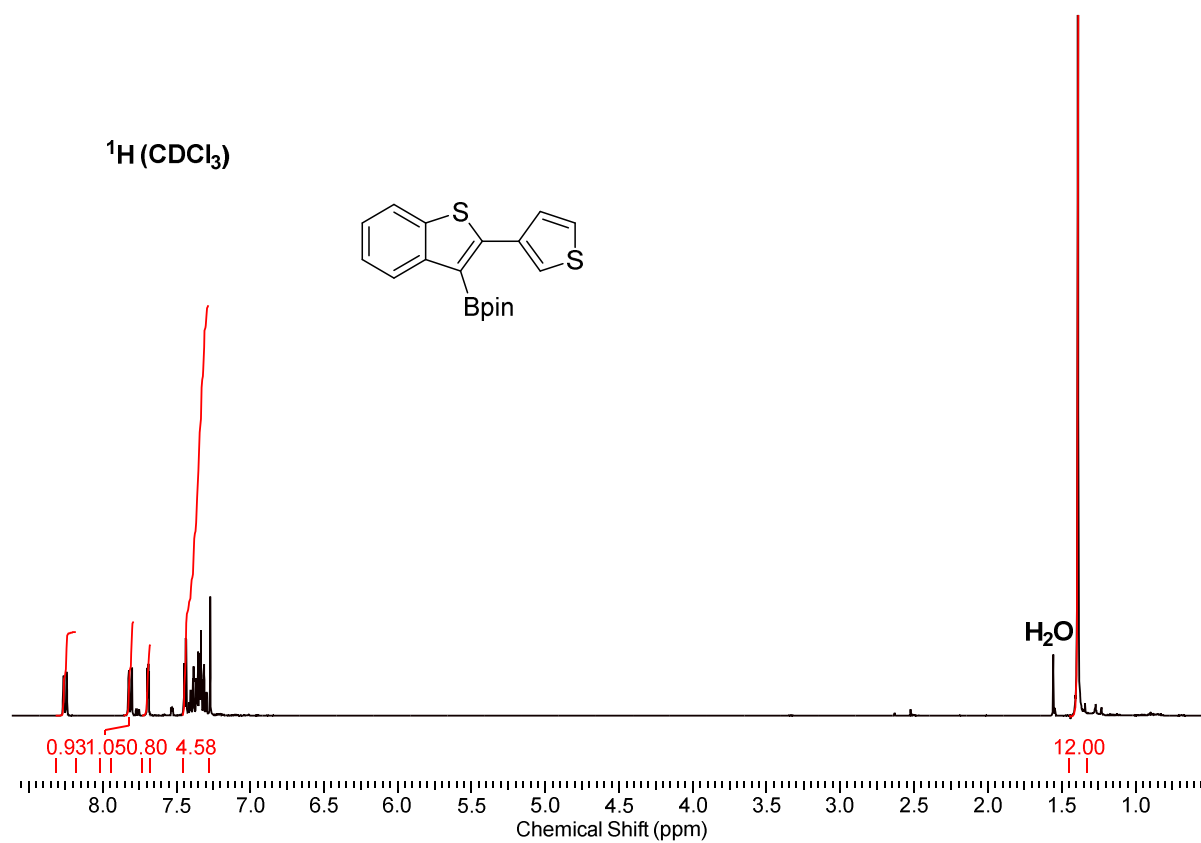



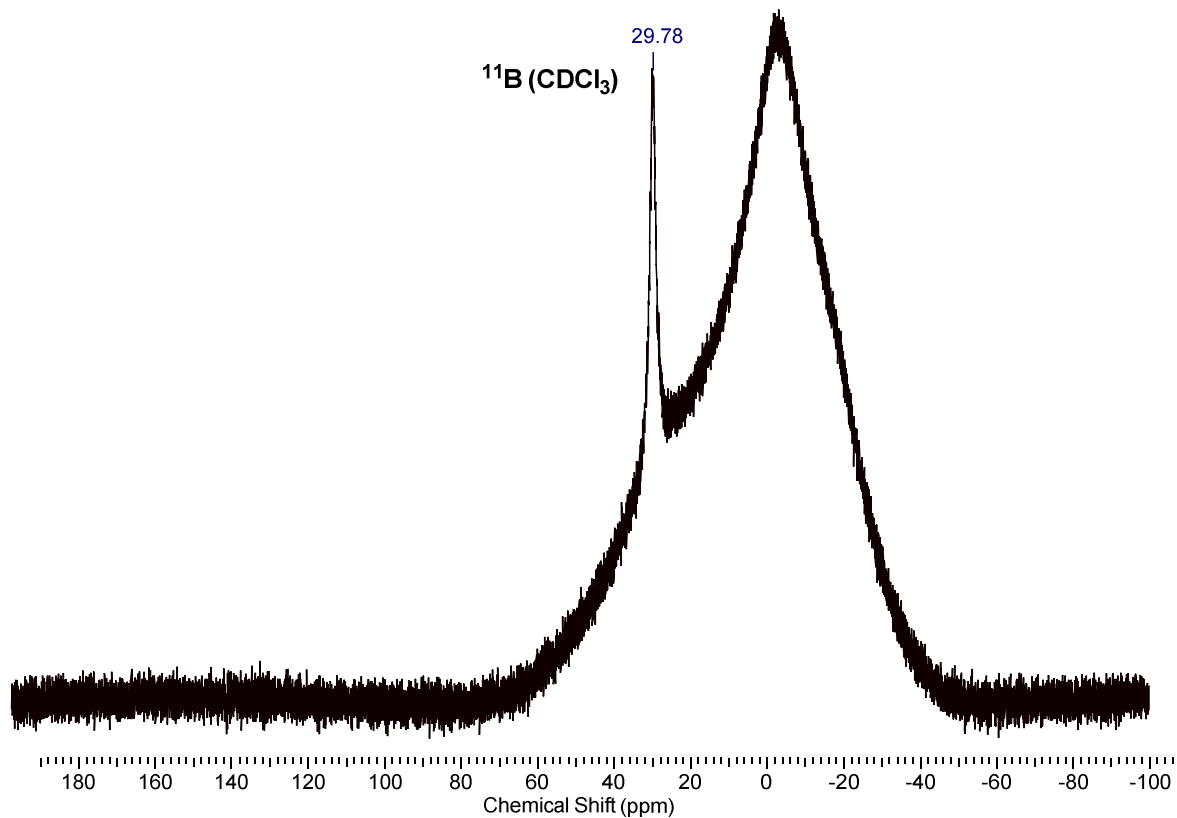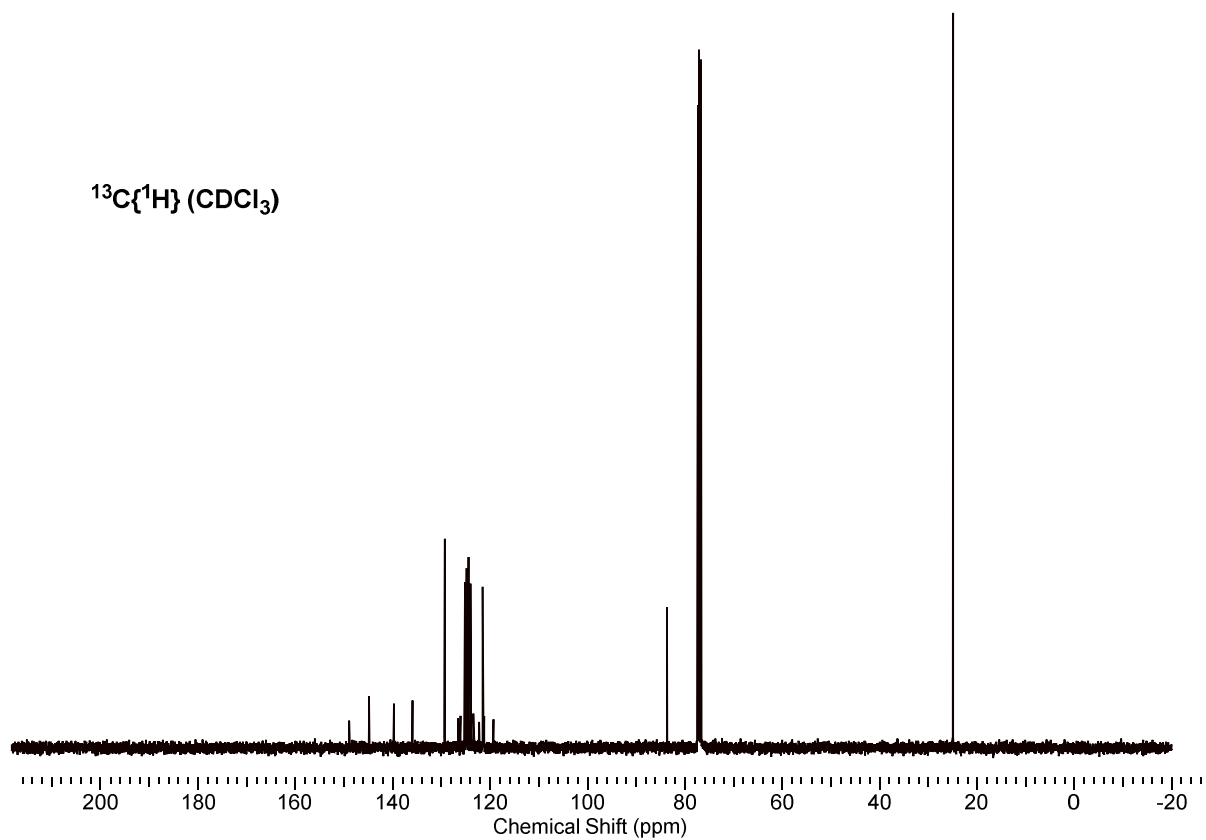

## 12. Crystal Data

Crystal structure of **2**, CCDC No: 1497854

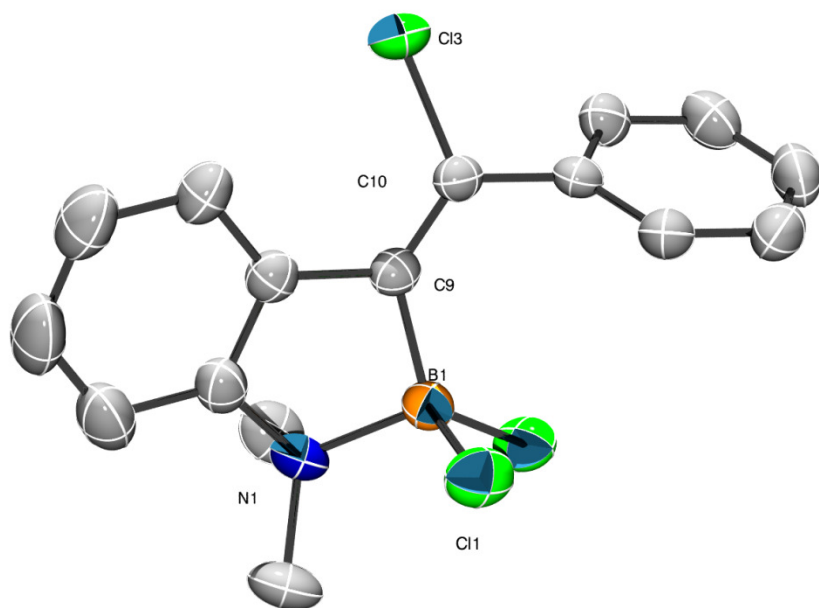

|                                                       |                                                    |
|-------------------------------------------------------|----------------------------------------------------|
| Empirical Formula                                     | C <sub>16</sub> H <sub>15</sub> BCl <sub>3</sub> N |
| FW g/mol                                              | 338.45                                             |
| Crystal System and Space Group                        | Monoclinic, P1 21/n 1                              |
| Temperature (K)                                       | 293                                                |
| a, b, c (Å)                                           | 8.9587(3), 18.6905(11), 9.9044(6)                  |
| α, β, γ (degrees)                                     | 90, 102.534(6), 90                                 |
| Volume (Å <sup>3</sup> )                              | 1618.89(7)                                         |
| Z                                                     | 4                                                  |
| Radiation                                             | Mo Kα, λ = 0.71703 Å                               |
| Absorption coefficient                                | 0.557                                              |
| F(000)                                                | 697.9662                                           |
| θ range (degrees)                                     | 29.32 – 3.46                                       |
| Number of reflections collected                       | 3687                                               |
| Number of unique reflections                          | 2382                                               |
| Number of data/ restraints/ parameters                | 3687/ 0/ 191                                       |
| R1 (data with [I <sup>2</sup> > 2σ(I <sup>2</sup> )]) | 0.0514                                             |
| wR2 (all data)                                        | 0.0886                                             |
| Goodness of fit                                       | 1.0452                                             |
| Δρ maximum and minimum (e. Å <sup>-3</sup> )          | 0.3896, -0.4563                                    |

Crystal structure of **4f**, CCDC No: 1497853

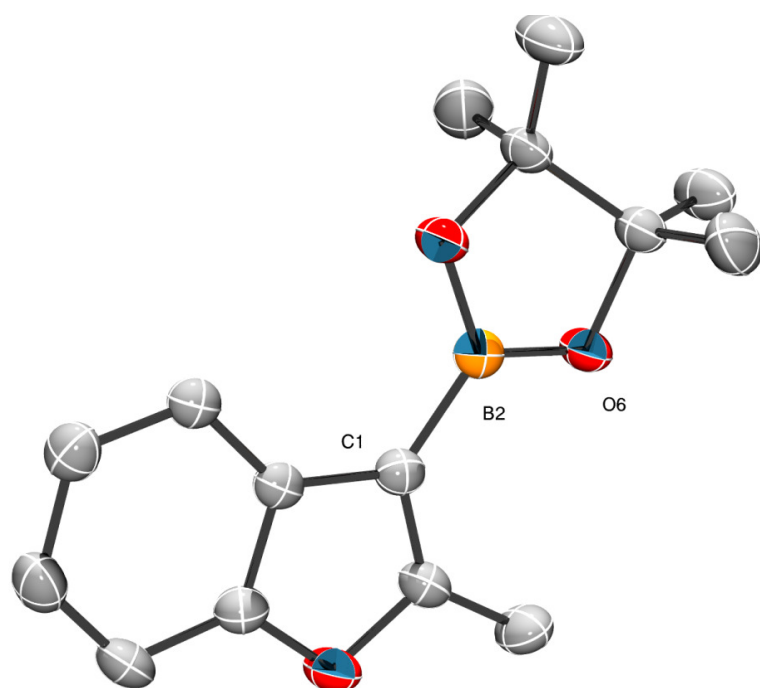

|                                                        |                                                 |
|--------------------------------------------------------|-------------------------------------------------|
| Empirical Formula                                      | C <sub>15</sub> H <sub>19</sub> BO <sub>3</sub> |
| FW g/mol                                               | 258.14                                          |
| Crystal System and Space Group                         | Triclinic, P-1                                  |
| Temperature (K)                                        | 150 K                                           |
| a, b, c (Å)                                            | 9.8070(6), 11.9834(8), 13.1747(10)              |
| α, β, γ (degrees)                                      | 110.781(6), 90.362(6), 101.733(18)              |
| Volume (Å <sup>3</sup> )                               | 1412.12(18)                                     |
| Z                                                      | 2                                               |
| Radiation                                              | Mo K $\alpha$ , $\lambda$ = 0.71703 Å           |
| Absorption coefficient                                 | 0.082                                           |
| F(000)                                                 | 552.2883                                        |
| $\Theta$ range (degrees)                               | 29.39 – 3.49                                    |
| Number of reflections collected                        | 6407                                            |
| Number of unique reflections                           | 3689                                            |
| Number of data/ restraints/ parameters                 | 6407/ 0/ 352                                    |
| R1 (data with [ $I^2 > 2\sigma(I^2)$ ])                | 0.0674                                          |
| wR2 (all data)                                         | 0.1300                                          |
| Goodness of fit                                        | 1.0252                                          |
| $\Delta\rho$ maximum and minimum (e. Å <sup>-3</sup> ) | 0.5223, -0.6167                                 |

### **13. References**

1. Walkinshaw, A. J.; Xu, W.; Suero, M. G.; Gaunt, M. J. *J. Am. Chem. Soc.* **2013**, *135*, 12532
2. Yamauchi, T.; Shibahara, F.; Murai, T. *Tetrahedron Lett.* **2016**, *57*, 2945-2948
3. Rubin, M.; Trofimov, A.; Gevorgyan, V. *J. Am. Chem. Soc.* **2005**, *127*, 10243 – 10249
4. Gay, R. M.; Manarin, F.; Schneider, C. C.; Barancelli, D. A.; Costa, M. D.; Zeni, G. *J. Org. Chem.* **2010**, *75*, 5701 – 5706
5. Cheng, C.; Isobe, M.; *Tetrahedron*, **2011**, *67*, 9957-9965
6. Maji, M. S.; Murarka, S.; Studer, A., *Org.Lett.* **2010**, *12*, 3878 – 3881
7. Yue, D.; Yao, T.; Larock, R. C. *J. Org. Chem.* **2005**, *70*, 25, 10292-10296
8. Jacubert, M.; Provot, O.; Peyrat, J.; Hamze, A.; Brion, J.; Alami, M., *Tetrahedron*, **2010**, *66*, 3375-3787
9. Thomas, R.; Varghese, S.; *Journal of Materials Chemistry*, **2009**, *19*, 4401 – 4406
10. Li, X.; Liu, X.; Chen, H.; Wu, W.; Qi, C.; Jiang, H. *Angew. Chem. Int. Ed.* **2014**, *53*, 14485-14489
11. Warner, A. J., Lawson, J. R., Fasano, V., Ingleson, M. J., *Angew. Chem. Int. Ed.*, **2015**, *127*, 11397-11401
12. Paraja, M.; Prez-Aguilar, C.; Valds, C.; *Chem. Comm.*, **2015**, *51*, 90, 16241-16243
